# Supplementary material for: Synthesis and cytotoxic activities of novel hybrid compounds of imidazole scaffold-based 2-substituted benzofurans
Source: Royal Society of Chemistry journal article supplement (doi:10.1039/c2ra20376f), 2012-01-01

## Electronic Supplementary Information (ESI)

### Synthesis and cytotoxic activities of novel hybrid compounds of imidazole scaffold-based 2-substituted benzofurans

Wen-Jian Song, Xiao-Dong Yang \*, Xiang-Hui Zeng, Xiao-Liang Xu,  
Gao-Lan Zhang, Hong-Bin Zhang \*

*Key Laboratory of Medicinal Chemistry for Natural Resource (Yunnan University),  
Ministry of Education, School of Chemical Science and Technology, Yunnan  
University, Kunming, 650091, P. R. China*

#### TABLE OF CONTENTS

|                                                                                      |     |
|--------------------------------------------------------------------------------------|-----|
| 1. General Experimental.....                                                         | S2  |
| 2. Analytical Data of Compound <b>4-24</b> .....                                     | S3  |
| 3. <sup>1</sup> H NMR and <sup>13</sup> C NMR Spectral of Compound <b>4-24</b> ..... | S12 |

---

\* Corresponding author. Tel.: +86-871-5031119; fax.: +86-871-5035538. E-mail: zhanghbyd@gmail.com, xdyang@ynu.edu.cn

## 1. General Experimental

Melting points were obtained on a XT-4 melting-point apparatus and were uncorrected. Proton nuclear magnetic resonance ( $^1\text{H-NMR}$ ) spectra were recorded on a Bruker Avance 300 spectrometer at 300 MHz. Carbon-13 nuclear magnetic resonance ( $^{13}\text{C-NMR}$ ) was recorded on Bruker Avance 300 spectrometer at 75 MHz. Chemical shifts are reported as  $\delta$  values in parts per million (ppm) relative to tetramethylsilane (TMS) for all recorded NMR spectra. Low-resolution Mass spectra were recorded on a VG Auto Spec-3000 magnetic sector MS spectrometer. High Resolution Mass spectra were taken on AB QSTAR Pulsar mass spectrometer. Element Analyses were taken on Vario EL III Elementar analyzer.

Silica gel (200–300 mesh) for column chromatography and silica GF<sub>254</sub> for TLC were produced by Qingdao Marine Chemical Company (China). All air- or moisture-sensitive reactions were conducted under an argon atmosphere. Starting materials and reagents used in reactions were obtained commercially from Acros, Aldrich, Fluka and were used without purification, unless otherwise indicated.

## 2. Analytical Data of Compound 4-24

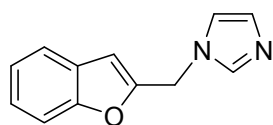

4

White powder, yield 76%, mp 71–73 °C (CHCl<sub>3</sub>). <sup>1</sup>H NMR (300 MHz, CDCl<sub>3</sub>) δ 7.62(1H, s), 7.54 (1H, dd, *J* = 7.3, 1.0 Hz), 7.44 (1H, d, *J* = 7.8 Hz), 7.32-7.23(2H, m), 7.23(1H, s), 7.02(1H, s), 6.63(1H, s), 5.21(2H, s). <sup>13</sup>C NMR (75 MHz, CDCl<sub>3</sub>) δ 155.29 (C), 151.72 (C), 137.40 (CH), 129.92 (CH), 127.81 (CH), 125.03 (CH), 123.28 (CH), 121.35 (CH), 119.30 (CH), 111.45 (CH), 105.58 (CH), 44.22 (CH<sub>2</sub>). HR-ESI-MS *m/z* Calcd for C<sub>12</sub>H<sub>10</sub>N<sub>2</sub>O 198.0793, Found 198.0757.

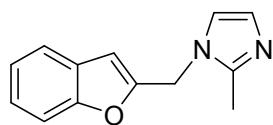

5

White powder, yield 72%, mp 76–78 °C (CHCl<sub>3</sub>). <sup>1</sup>H NMR (300 MHz, CDCl<sub>3</sub>) δ 7.53 (1H, dd, *J* = 7.2, 1.3 Hz), 7.44 (1H, d, *J* = 7.6 Hz), 7.29-7.22 (2H, m), 6.94 (2H, s), 6.52 (1H, s), 5.13 (2H, s), 2.47 (3H, s). <sup>13</sup>C NMR (75 MHz, CDCl<sub>3</sub>) δ 155.26 (C), 152.17 (C), 144.95 (C), 127.69 (CH), 124.88 (CH), 123.26 (CH), 121.27 (CH), 119.75 (CH), 111.43 (CH), 105.01 (CH), 43.58 (CH<sub>2</sub>), 13.14 (CH<sub>3</sub>). HR-ESI-MS *m/z* Calcd for C<sub>13</sub>H<sub>12</sub>N<sub>2</sub>O 212.0950, Found 212.0919.

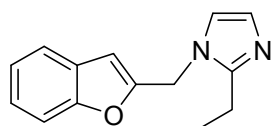

6

Yellow oil, yield 83%. <sup>1</sup>H NMR (300 MHz, CDCl<sub>3</sub>) δ 7.52 (1H, dd, *J* = 7.3, 1.1 Hz), 7.43 (1H, d, *J* = 7.6 Hz), 7.29-7.22 (2H, m), 6.98 (1H, s), 6.93 (1H, s), 6.52 (1H, s),

5.14 (2H, s), 2.78 (2H, q,  $J = 15.0$  Hz), 1.36 (3H, t,  $J = 7.5$  Hz).  $^{13}\text{C}$  NMR (75 MHz,  $\text{CDCl}_3$ )  $\delta$  155.13 (C), 152.21 (C), 149.43 (C), 127.61 (CH), 124.76 (CH), 123.15 (CH), 121.16 (CH), 119.57 (CH), 111.32 (CH), 104.90 (CH), 43.09 ( $\text{CH}_2$ ), 20.12 ( $\text{CH}_2$ ), 11.99 ( $\text{CH}_3$ ). HR-ESI-MS  $m/z$  Calcd for  $\text{C}_{14}\text{H}_{14}\text{N}_2\text{O}$  226.1106, Found 226.1075.

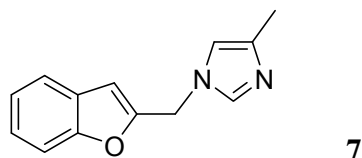

Brown oil, yield 54%.  $^1\text{H}$  NMR (300 MHz,  $\text{CDCl}_3$ )  $\delta$  7.46-7.33 (3H, m), 7.20-7.13 (2H, m), 6.70, 6.63 (1H, s), 6.63, 6.42 (1H, s), 5.03 (2H, s), 2.13 (3H, s).  $^{13}\text{C}$  NMR (75 MHz,  $\text{CDCl}_3$ )  $\delta$  155.19 (C), 151.96 (C), 138.85 (C), 136.46 (CH), 127.81 (CH), 124.88 (CH), 123.18 (CH), 121.25 (CH), 115.67 (CH), 111.38 (CH), 105.36 (CH), 44.06 ( $\text{CH}_2$ ), 13.71 ( $\text{CH}_3$ ). HR-ESI-MS  $m/z$  Calcd for  $\text{C}_{13}\text{H}_{12}\text{N}_2\text{O}$  212.0950, Found 212.0907.

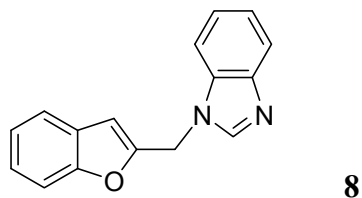

White powder, yield 78%, mp 128–130 °C ( $\text{CHCl}_3$ ).  $^1\text{H}$  NMR (300 MHz,  $\text{CDCl}_3$ )  $\delta$  7.96 (1H, s), 7.84-7.81 (1H, m), 7.47-7.37 (3H, m), 7.28-7.17 (4H, m), 6.56 (1H, s), 5.32 (2H, s).  $^{13}\text{C}$  NMR (75 MHz,  $\text{CDCl}_3$ )  $\delta$  155.08 (C), 151.07 (C), 143.82 (C), 143.02 (CH), 133.66 (C), 127.69 (C), 124.86 (CH), 123.24 (CH), 122.42 (CH), 121.20 (CH), 120.47 (CH), 111.32 (CH), 109.77 (CH), 105.51 (CH), 42.18 ( $\text{CH}_2$ ). HR-ESI-MS  $m/z$  Calcd for  $\text{C}_{16}\text{H}_{12}\text{N}_2\text{O}$  248.0950, Found 248.0944. Anal. Calcd for  $\text{C}_{16}\text{H}_{12}\text{N}_2\text{O}$ : C, 77.40; H, 4.87; N, 11.28. Found: C, 77.33; H, 4.86; N, 10.95.

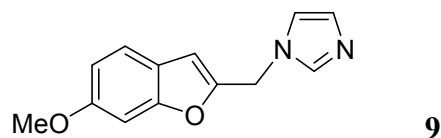

Yellow oil, yield 75%.  $^1\text{H}$  NMR (300 MHz,  $\text{CDCl}_3$ )  $\delta$  7.45(1H, s), 7.27 (1H, d,  $J = 8.6$  Hz), 6.95 (1H, s), 6.89 (1H, s), 6.84 (1H, d,  $J = 1.7$  Hz), 6.75 (1H, dd,  $J = 8.6, 2.2$  Hz), 6.45 (1H, s), 5.02 (2H, s), 3.69 (3H, s).  $^{13}\text{C}$  NMR (75 MHz,  $\text{CDCl}_3$ )  $\delta$  158.39 (C), 156.21 (C), 150.50 (C), 137.17 (CH), 129.47 (CH), 121.33 (CH), 120.86 (C), 119.18 (CH), 112.27 (CH), 105.47 (CH), 95.88 (CH), 55.65 ( $\text{CH}_3$ ), 44.00 ( $\text{CH}_2$ ). HR-ESI-MS  $m/z$  Calcd for  $\text{C}_{13}\text{H}_{12}\text{N}_2\text{O}_2$  228.0899, Found 228.0863.

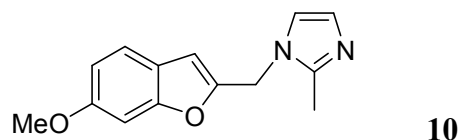

Brown oil, yield 71%.  $^1\text{H}$  NMR (300 MHz,  $\text{CDCl}_3$ )  $\delta$  7.29 (1H, d,  $J = 8.5$  Hz), 6.88 (1H, d,  $J = 2.0$  Hz), 6.85-6.83 (2H, m), 6.78 (1H, dd,  $J = 8.5, 2.0$  Hz), 6.40 (1H, s), 4.99 (2H, s), 3.74(3H, s), 2.38(3H, s).  $^{13}\text{C}$  NMR (75 MHz,  $\text{CDCl}_3$ )  $\delta$  158.34 (C), 156.18 (C), 150.88 (C), 144.74 (C), 127.35 (CH), 121.21 (CH), 120.92 (C), 119.54 (CH), 112.21 (CH), 104.85 (CH), 95.95 (CH), 55.70 ( $\text{CH}_3$ ), 43.39 ( $\text{CH}_2$ ), 12.96 ( $\text{CH}_3$ ). HR-ESI-MS  $m/z$  Calcd for  $\text{C}_{14}\text{H}_{14}\text{N}_2\text{O}_2$  242.1055, Found 242.1019

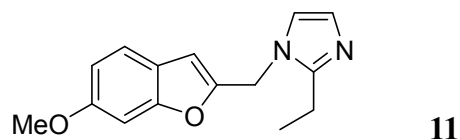

Brown oil, yield 80%.  $^1\text{H}$  NMR (300 MHz,  $\text{CDCl}_3$ )  $\delta$  7.28 (1H, d,  $J = 8.5$  Hz), 6.87 (2H, s), 6.82 (1H, d,  $J = 1.2$  Hz), 6.77 (1H, dd,  $J = 8.5, 1.2$  Hz), 6.39 (1H, s), 5.00 (2H, s), 3.73 (3H, s), 2.69 (2H, q,  $J = 15.0$  Hz), 1.27 (3H, t,  $J = 7.5$  Hz).  $^{13}\text{C}$  NMR (75 MHz,  $\text{CDCl}_3$ )  $\delta$  158.30 (C), 156.15 (C), 151.01 (C), 149.33 (C), 127.35 (CH), 121.20 (CH), 120.93 (C), 119.46 (CH), 112.19 (CH), 104.86 (CH), 95.93 (CH), 55.69 ( $\text{CH}_3$ ),

43.00 (CH<sub>2</sub>), 20.06 (CH<sub>2</sub>), 11.97 (CH<sub>3</sub>). HR-ESI-MS *m/z* Calcd for C<sub>15</sub>H<sub>16</sub>N<sub>2</sub>O<sub>2</sub> 256.1212, Found 256.1178.

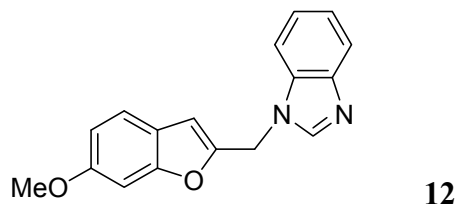

Brown oil, yield 70%. <sup>1</sup>H NMR (300 MHz, CDCl<sub>3</sub>) δ 8.03 (1H, s), 7.76-7.73 (1H, m), 7.43-7.40 (1H, m), 7.30 (1H, d, *J* = 8.6 Hz), 7.26-7.21 (2H, m), 7.19 (1H, s), 6.87 (1H, d, *J* = 1.8 Hz), 6.78 (1H, dd, *J* = 8.6, 2.1 Hz), 6.54 (1H, s), 5.42 (2H, s), 3.83 (3H, s). <sup>13</sup>C NMR (75 MHz, CDCl<sub>3</sub>) δ 158.43 (C), 156.22 (C), 149.88 (C), 143.76 (C), 142.94 (CH), 123.25 (CH), 122.44 (CH), 121.29 (CH), 120.87 (C), 120.47 (CH), 112.35 (CH), 109.76 (CH), 105.59 (CH), 95.93 (CH), 55.70 (CH<sub>3</sub>), 42.33 (CH<sub>2</sub>). HR-ESI-MS *m/z* Calcd for C<sub>17</sub>H<sub>14</sub>N<sub>2</sub>O<sub>2</sub> 278.1055, Found 278.1018.

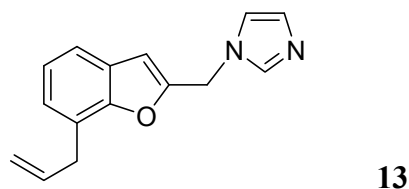

Brown oil, yield 80%. <sup>1</sup>H NMR (300 MHz, CDCl<sub>3</sub>) δ 7.55 (1H, s), 7.31 (1H, d, *J* = 7.5 Hz), 7.13-7.02 (3H, m), 6.96 (1H, s), 6.55 (1H, s), 6.00-5.89 (1H, m), 5.16 (2H, s), 5.09-5.01 (2H, m), 3.55 (2H, d, *J* = 6.6 Hz). <sup>13</sup>C NMR (75 MHz, CDCl<sub>3</sub>) δ 153.73 (C), 151.38 (C), 137.29 (CH), 135.62 (CH), 129.80 (CH), 127.50 (C), 124.95 (CH), 123.85 (CH), 123.39 (C), 119.22 (CH), 116.35 (CH<sub>2</sub>), 105.71 (CH), 44.19 (CH<sub>2</sub>), 33.77 (CH<sub>2</sub>). HR-ESI-MS *m/z* Calcd for C<sub>15</sub>H<sub>14</sub>N<sub>2</sub>O 238.1106, Found 238.1084.

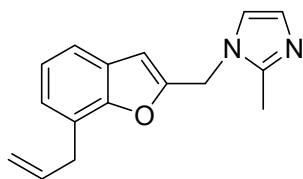

**14**

Brown oil, yield 73%.  $^1\text{H}$  NMR (300 MHz,  $\text{CDCl}_3$ )  $\delta$  7.29 (1H, d,  $J = 7.5$  Hz), 7.10-7.00 (2H, m), 6.84 (2H, s), 5.99-5.90 (1H, m), 5.08-4.99 (2H, m), 5.03 (2H, s), 3.53 (2H, d,  $J = 6.2$  Hz), 2.39 (3H, s).  $^{13}\text{C}$  NMR (75 MHz,  $\text{CDCl}_3$ )  $\delta$  153.65 (C), 151.77 (C), 144.83 (C), 135.63 (CH), 127.54 (C), 127.34 (CH), 124.79 (CH), 123.77 (C), 123.36 (CH), 119.63 (CH), 119.15 (CH), 116.36 ( $\text{CH}_2$ ), 105.13 (CH), 43.48 ( $\text{CH}_2$ ), 33.81 ( $\text{CH}_2$ ), 12.92 ( $\text{CH}_3$ ). HR-ESI-MS  $m/z$  Calcd for  $\text{C}_{16}\text{H}_{16}\text{N}_2\text{O}$  252.1263, Found 252.1221.

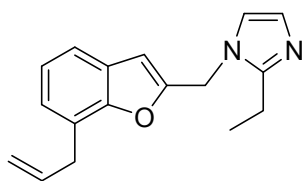

**15**

Brown oil, yield 78%.  $^1\text{H}$  NMR (300 MHz,  $\text{CDCl}_3$ )  $\delta$  7.37 (1H, d,  $J = 7.3$  Hz), 7.23-7.09 (2H, m), 6.96-6.93 (3H, m), 6.52 (1H, s), 6.09-5.96 (2H, m), 5.16-5.08 (2H, m), 5.14 (2H, s), 3.62 (2H, d,  $J = 6.2$  Hz), 2.78 (3H, t,  $J = 7.5$  Hz).  $^{13}\text{C}$  NMR (75 MHz,  $\text{CDCl}_3$ )  $\delta$  153.64 (C), 151.82 (C), 149.42 (C), 135.62 (CH), 127.53 (C), 127.27 (CH), 124.80 (CH), 123.77 (C), 123.37 (CH), 121.16 (CH), 119.62 (CH), 119.15 (CH), 116.34 (CH), 105.19 ( $\text{CH}_2$ ), 43.13 ( $\text{CH}_2$ ), 33.80 ( $\text{CH}_2$ ), 21.74 ( $\text{CH}_2$ ), 12.07 ( $\text{CH}_3$ ). HR-ESI-MS  $m/z$  Calcd for  $\text{C}_{17}\text{H}_{18}\text{N}_2\text{O}$  266.1419, 266.1395.

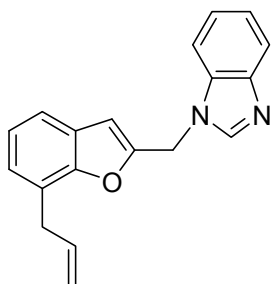

**16**

Yellow powder, yield 70%, mp 48–50 °C.  $^1\text{H}$  NMR (300 MHz,  $\text{CDCl}_3$ )  $\delta$  7.92(1H, s), 7.76–7.73 (1H, m), 7.41–7.39 (1H, m), 7.28–7.20 (3H, m), 7.06–6.99 (2H, m), 6.52 (1H, s), 5.96–5.85 (1H, m), 5.34 (2H, s), 5.05–4.97(2H, dd,  $J = 15.3, 8.4$  Hz), 3.51 (2H, d,  $J = 6.3$  Hz).  $^{13}\text{C}$  NMR (75 MHz,  $\text{CDCl}_3$ )  $\delta$  153.69 (C), 150.86 (C), 143.85 (C), 142.96 (CH), 135.60 (CH), 133.74 (C), 127.51 (C), 124.93 (CH), 123.85 (C), 123.41 (CH), 123.25 (CH), 122.44 (CH), 120.52 (CH), 119.21 (CH), 116.38 (CH<sub>2</sub>), 109.82 (CH), 105.81 (CH), 42.35 (CH<sub>2</sub>), 33.81 (CH<sub>2</sub>). HR-ESI-MS  $m/z$  Calcd for  $\text{C}_{19}\text{H}_{16}\text{N}_2\text{O}$  288.1263, Found 288.1259.

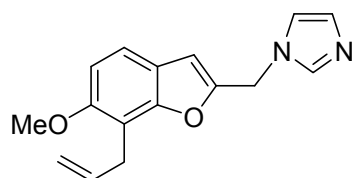

17

Brown oil, yield 74%.  $^1\text{H}$  NMR (300 MHz,  $\text{CDCl}_3$ )  $\delta$  7.59 (1H, s), 7.30 (1H, d,  $J = 8.6$  Hz), 7.05 (1H, s), 6.99 (1H, s), 6.85 (1H, d,  $J = 8.6$  Hz), 6.52 (1H, s), 6.05–5.96 (1H, m), 5.13 (2H, s), 5.06 (1H, d,  $J = 1.3$  Hz), 4.98 (1H, d,  $J = 10.3$  Hz), 3.84 (3H, s), 3.58 (2H, d,  $J = 6.2$  Hz).  $^{13}\text{C}$  NMR (75 MHz,  $\text{CDCl}_3$ )  $\delta$  155.44 (C), 154.80 (C), 150.80 (C), 137.15 (CH), 135.67 (CH), 129.31 (CH), 121.28 (C), 119.26 (CH), 118.71 (CH), 115.07 (CH<sub>2</sub>), 112.08 (C), 108.19 (CH), 105.55 (CH), 56.66 (CH<sub>3</sub>), 44.12 (CH<sub>2</sub>), 27.86 (CH<sub>2</sub>). HR-ESI-MS  $m/z$  Calcd for  $\text{C}_{16}\text{H}_{16}\text{N}_2\text{O}_2$  268.1212, Found 268.1991.

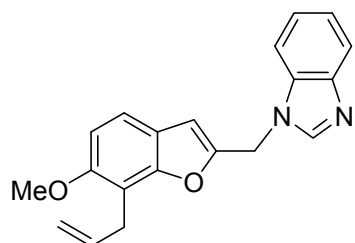

18

White powder, yield 68%, mp 118–120 °C ( $\text{CHCl}_3$ ).  $^1\text{H}$  NMR (300 MHz,  $\text{CDCl}_3$ )  $\delta$  7.99 (1H, s), 7.83–7.80 (1H, m), 7.50–7.47 (1H, m), 7.30 (2H, s), 7.29–7.26 (1H, m),



6.85-6.82 (1H, d,  $J = 8.6$  Hz), 6.52 (1H, s), 6.03-5.94 (1H, m), 5.37 (2H, m), 5.05-4.94 (2H, m), 3.83 (3H, s), 3.58 (2H, d,  $J = 6.2$  Hz).  $^{13}\text{C}$  NMR (75 MHz,  $\text{CDCl}_3$ )  $\delta$  155.44 (C), 154.78 (C), 150.35 (C), 143.80 (C), 142.94 (CH), 135.66 (CH), 133.75 (C), 123.19 (CH), 122.39 (CH), 121.30 (C), 120.43 (CH), 118.65 (CH), 115.10 ( $\text{CH}_2$ ), 112.15 (C), 109.89 (CH), 108.18 (CH), 105.58 (CH), 56.69 ( $\text{CH}_3$ ), 42.35 ( $\text{CH}_2$ ), 27.93 ( $\text{CH}_2$ ). HR-ESI-MS  $m/z$  Calcd for  $\text{C}_{20}\text{H}_{18}\text{N}_2\text{O}_2$  318.1368, Found 318.1353.

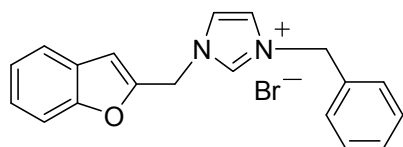

White powder, yield 90%, mp 176–178 °C (MeOH).  $^1\text{H}$  NMR (300 MHz, MeOD)  $\delta$  9.42 (1H, s), 7.77 (1H, s), 7.48-7.41 (6H, m), 7.33-7.25 (2H, m), 7.13 (1H, s), 5.72 (2H, s), 5.48 (2H, s).  $^{13}\text{C}$  NMR (75 MHz, MeOD)  $\delta$  156.88 (C), 150.55 (C), 137.76 (CH), 135.12 (C), 130.49 (CH), 129.89 (CH), 129.03 (C), 126.72 (CH), 124.60 (CH), 124.27 (CH), 122.92 (CH), 112.36 (CH), 109.23 (CH), 54.40 ( $\text{CH}_2$ ), 47.38 ( $\text{CH}_2$ ). HR-ESI-MS  $m/z$  Calcd for  $\text{C}_{19}\text{H}_{17}\text{N}_2\text{O}$   $[\text{M}-\text{Br}]^+$  289.1335, Found 289.1325.

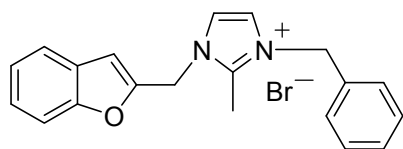

White powder, yield 92%, mp 175–177 °C (MeOH).  $^1\text{H}$  NMR (300 MHz, MeOD)  $\delta$  6.38 (1H, s), 6.30-6.24 (2H, m), 6.14-5.91 (8H, m), 5.78 (1H, s), 4.35(2H, s), 4.13(2H, s), 1.49(3H, s).  $^{13}\text{C}$  NMR (75 MHz, MeOD)  $\delta$  155.41 (C), 149.31 (C), 145.12 (C), 133.53 (C), 129.08 (CH), 128.75 (CH), 127.80 (CH), 127.62 (C), 125.23 (CH), 123.20 (CH), 121.89 (CH), 121.46 (CH), 110.92 (CH), 107.37 (CH), 51.71 ( $\text{CH}_2$ ), 44.97 ( $\text{CH}_2$ ), 9.35 ( $\text{CH}_3$ ). HR-ESI-MS  $m/z$  Calcd for  $\text{C}_{20}\text{H}_{19}\text{N}_2\text{O}$  303.1492, Found 303.1486.

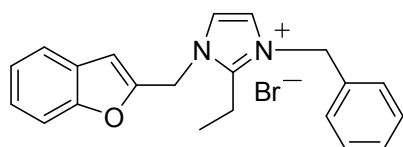

21

White powder, yield 88%, mp 179–181 °C (MeOH).  $^1\text{H}$  NMR (300 MHz, MeOD)  $\delta$  7.59 (1H, d,  $J = 2.2$  Hz), 7.53 (1H, d,  $J = 8.6$  Hz), 7.46 (1H, d,  $J = 2.2$  Hz), 7.35-7.31 (4H, m), 7.25-7.23 (3H, m), 7.14 (1H, s), 6.99 (1H, s), 5.57 (2H, s), 5.37 (2H, s), 3.21 (2H, q,  $J = 15.0$  Hz), 1.05 (3H, t,  $J = 7.5$  Hz).  $^{13}\text{C}$  NMR (75 MHz, MeOD)  $\delta$  155.37 (C), 149.32 (C), 148.78 (C), 133.85 (C), 129.08 (CH), 128.77 (CH), 127.75 (CH), 125.29 (CH), 123.24 (CH), 122.23 (CH), 121.92 (CH), 121.48 (CH), 110.90 (CH), 107.59 (CH), 51.58 (CH<sub>2</sub>), 44.83 (CH<sub>2</sub>), 16.89 (CH<sub>2</sub>), 10.33 (CH<sub>3</sub>). HR-ESI-MS  $m/z$  Calcd for C<sub>21</sub>H<sub>21</sub>N<sub>2</sub>O [M-Br]<sup>+</sup> 317.1648, Found 310.1641.

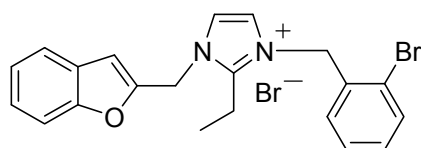

22

White powder, yield 85%, mp 219–221 °C (MeOH).  $^1\text{H}$  NMR (300 MHz, MeOD)  $\delta$  7.76 (1H, d,  $J = 2.2$  Hz), 7.66-7.60 (2H, m), 7.49-7.46 (2H, m), 7.39-7.29 (4H, m), 7.23-7.20 (1H, m), 7.18 (1H, s), 5.77 (2H, s), 5.55 (2H, s), 3.33 (2H, q,  $J = 15.0$  Hz), 1.23 (3H, t,  $J = 7.5$  Hz).  $^{13}\text{C}$  NMR (75 MHz, MeOD)  $\delta$  156.77 (C), 150.76 (C), 150.41 (C), 134.85 (CH), 133.95 (C), 132.52 (CH), 132.29 (CH), 130.96 (CH), 129.91 (CH), 129.04 (C), 126.77 (CH), 124.73 (C), 123.53 (CH), 123.27 (CH), 122.98 (CH), 112.37 (CH), 109.07 (CH), 53.23 (CH<sub>2</sub>), 46.43 (CH<sub>2</sub>), 18.61 (CH<sub>2</sub>), 11.86 (CH<sub>3</sub>). HR-ESI-MS  $m/z$  Calcd for C<sub>21</sub>H<sub>20</sub>BrN<sub>2</sub>O [M-Br]<sup>+</sup> 395.0754, Found 395.0742.

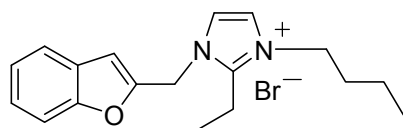

23

White powder, yield 75%, mp 145–147 °C (MeOH).  $^1\text{H}$  NMR (300 MHz, MeOD)  $\delta$

7.69-7.64 (3H, m), 7.48 (1H, d,  $J = 8.3$  Hz), 7.36-7.28 (2H, m), 7.12 (1H, s), 5.68 (2H, s), 4.22 (2H, q,  $J = 15.0$  Hz), 1.93-1.83 (2H, m), 1.51-1.38 (2H, m), 1.33 (3H, t,  $J = 7.5$  Hz), 1.01 (3H, t,  $J = 7.5$  Hz).  $^{13}\text{C}$  NMR (75 MHz, MeOD)  $\delta$  156.80 (C), 150.76 (C), 149.68 (C), 128.99 (C), 126.64 (CH), 124.61 (CH), 123.24 (CH), 122.91 (CH), 122.80 (CH), 112.22 (CH), 108.77 (CH), 48.75 (CH<sub>2</sub>), 33.11 (CH<sub>2</sub>), 20.66 (CH<sub>2</sub>), 17.95 (CH<sub>2</sub>), 13.89 (CH<sub>3</sub>), 12.02 (CH<sub>3</sub>). HR-ESI-MS  $m/z$  Calcd for C<sub>18</sub>H<sub>23</sub>N<sub>2</sub>O [M-Br]<sup>+</sup> 283.1805, Found 283.1794.

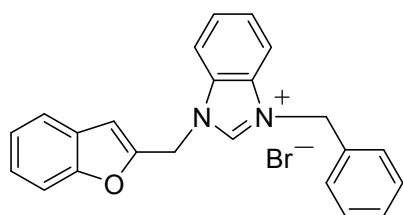

24

White powder, yield 89%, mp 218–220 °C (MeOH).  $^1\text{H}$  NMR (300 MHz, MeOD)  $\delta$  8.39 (1H, s), 6.60 (1H, d,  $J = 7.6$  Hz), 6.37 (1H, d,  $J = 7.6$  Hz), 6.19-6.10 (3H, m), 6.01-5.91 (6H, m), 5.80-5.73 (2H, m), 5.70 (s, 1H), 4.52 (s, 2H), 4.27 (s, 2H).  $^{13}\text{C}$  NMR (75 MHz, MeOD)  $\delta$  148.74 (C), 142.01 (C), 133.02 (C), 131.42 (C), 129.04 (CH), 128.91 (CH), 128.04 (CH), 127.57 (C), 127.20 (CH), 127.09 (CH), 125.19 (CH), 123.12 (CH), 121.37 (CH), 113.67 (CH), 113.48 (CH), 110.81 (CH), 107.80 (CH), 50.77 (CH<sub>2</sub>), 43.86 (CH<sub>2</sub>). HR-ESI-MS  $m/z$  Calcd for C<sub>23</sub>H<sub>19</sub>N<sub>2</sub>O [M-Br]<sup>+</sup> 339.1492, Found 339.1483. Anal. Calcd for C<sub>23</sub>H<sub>19</sub>BrN<sub>2</sub>O: C, 65.88; H, 4.57; N, 6.68. Found: C, 66.29; H, 4.57; N, 6.31.

Compound 8  $^1\text{H}$  NMR (300 MHz) and  $^{13}\text{C}$  NMR (75 MHz)

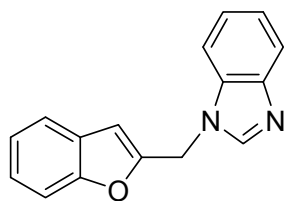

Current data Parameters  
Name: 48  
EXPNO: 1  
PROCNO: 1

F2 - Acquisition Parameters  
Date\_ : 20081229  
Time : 10.06  
INSTRUM : av300  
PROBHD : 5 mm QNP 1H/13  
TD : 65536  
SOLVENT : CDCl3  
AQ : 8  
RG : 1  
SWH : 4789.272 Hz  
FIDRES : 0.073078 Hz  
AQRES : 6.8420046 sec  
RG : 90.5  
DM : 104.400 usec  
DE : 6.00 usec  
TE : 295.2 K  
SI : 1.00000000 sec  
SCANS : 0.00000000 sec  
SFO1 : 300.1321009 MHz  
NUC1 :  $^1\text{H}$   
P1 : 8.00 usec  
PL1 : -2.00 dB  
SFO2 : 300.1321009 MHz

F2 - Processing parameters  
SI : 32768  
SF : 300.1300217 MHz  
WDW : EM  
SSB : 0  
LB : 0.30 Hz  
GB : 0  
PC : 1.00

1D 1H NMR parameters  
CX : 23.00 cm  
CY : 12.50 cm  
Z1 : 8.014 cm  
Z2 : 2675.23 Hz  
Z3 : 1.066 cm  
Z4 : 228.30 cm  
Z5 : 1.250 cm  
Z6 : 2.250 cm

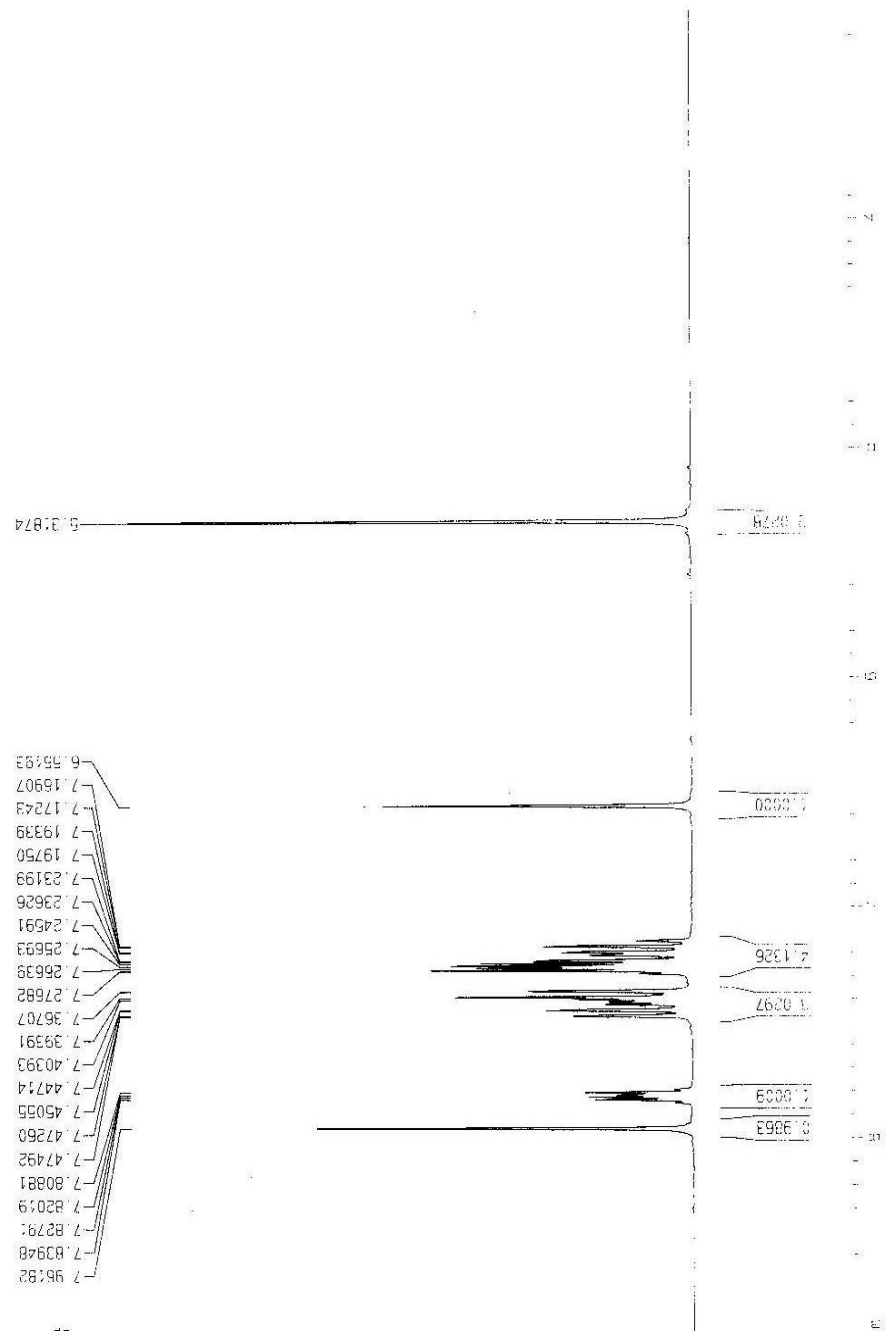

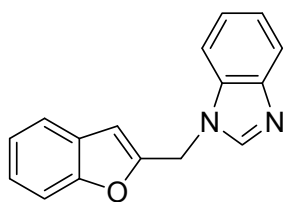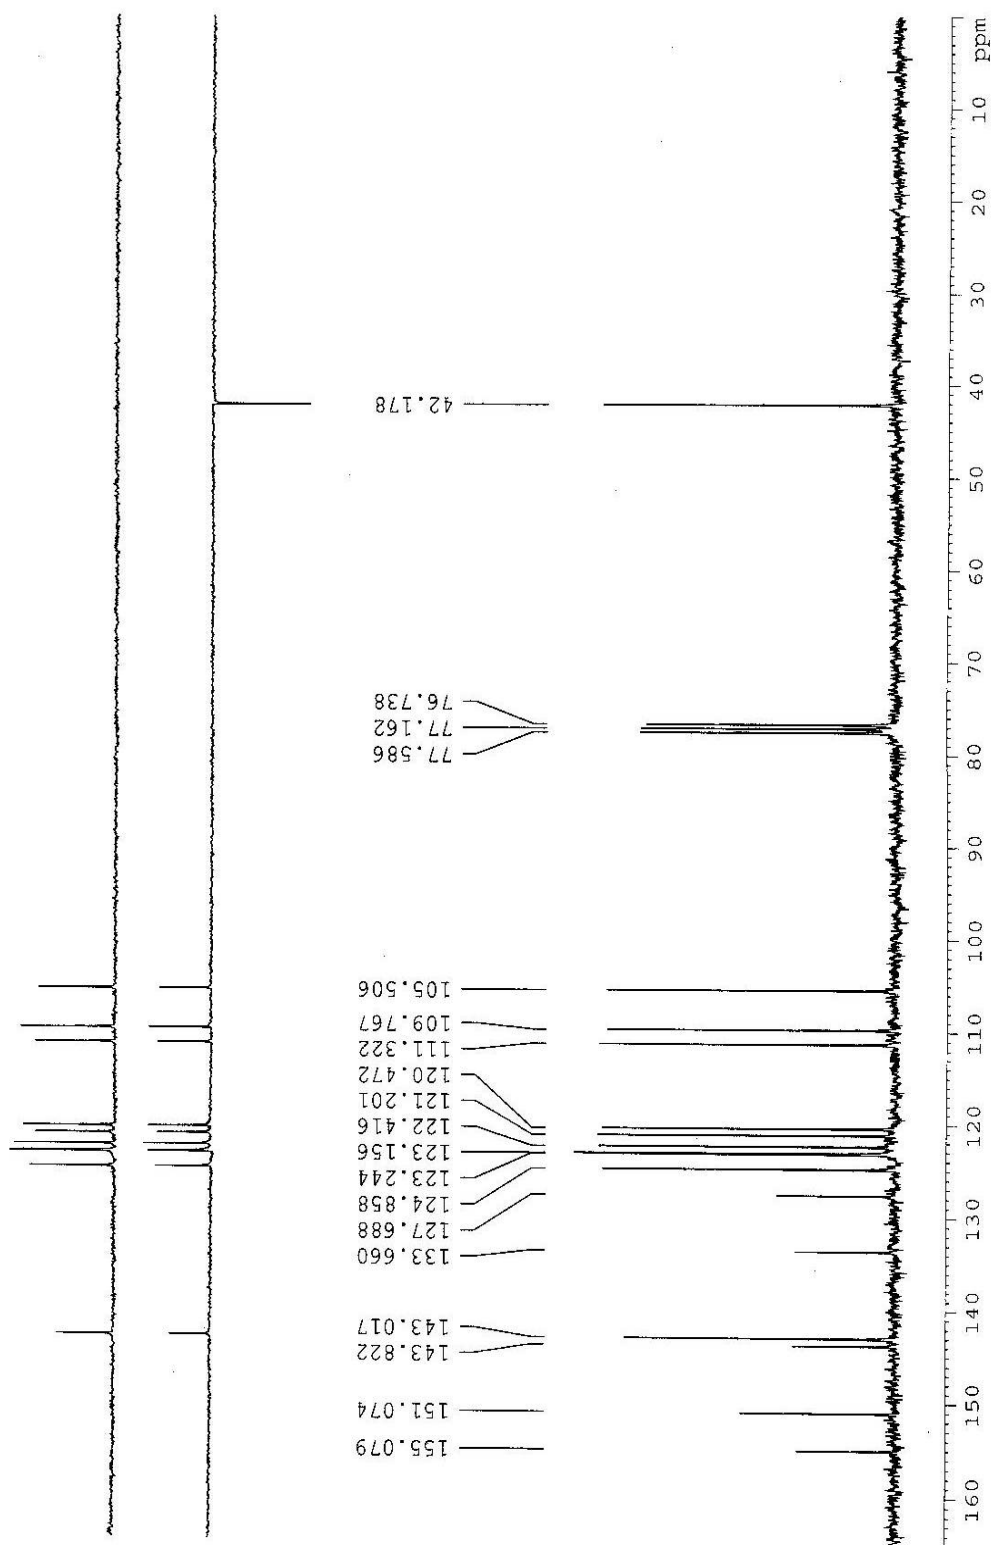

Compound 24  $^1\text{H}$  NMR (300 MHz) and  $^{13}\text{C}$  NMR (75 MHz)

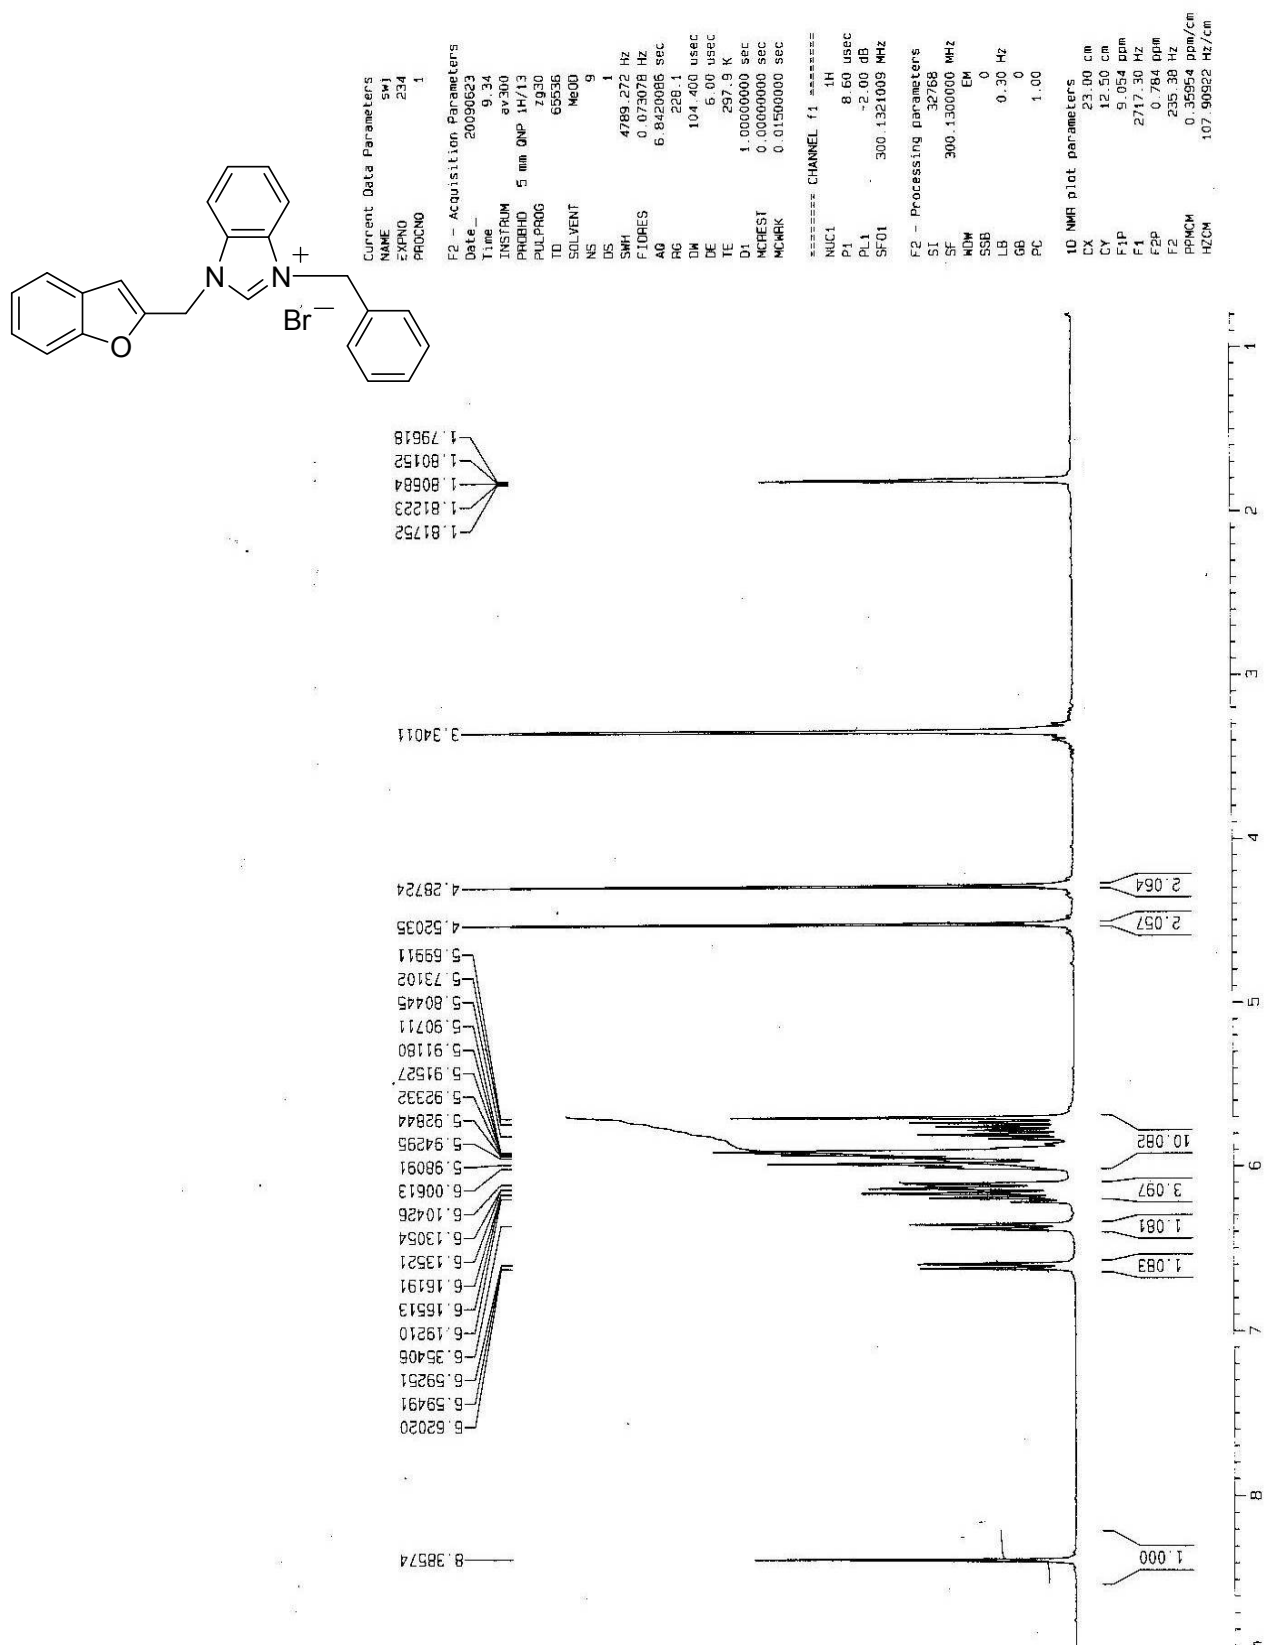

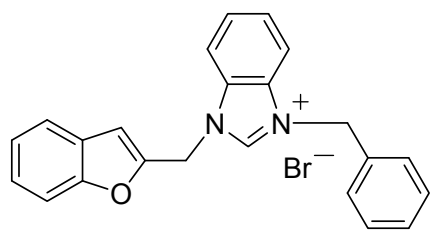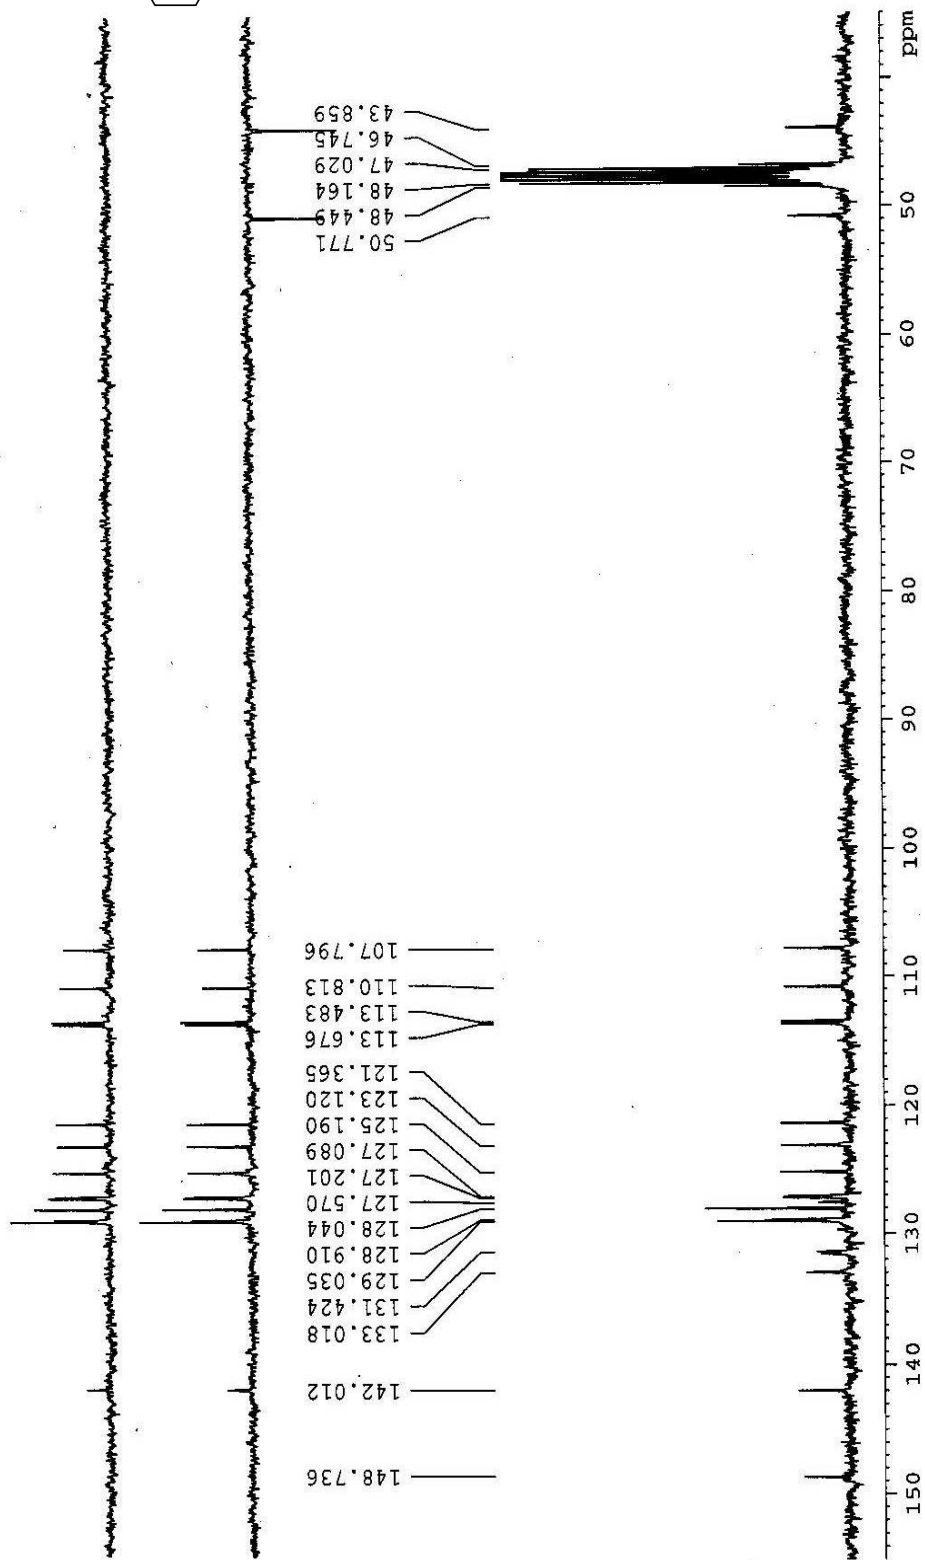

Compound 4 <sup>1</sup>H NMR (300 MHz) and <sup>13</sup>C NMR (75 MHz)

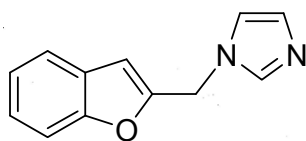

Current Data Parameters  
NAME swj  
EXPNO 52  
PROCNO 1

F2 - Acquisition Parameters  
Date\_ 20081229  
Time 10.25  
INSTRUM av300  
PROBHD 5 mm QNP 1H/13  
PULPROG zg30  
TD 65536  
SOLVENT CDCl3  
NS 10  
DS 1  
SWH 4789.272 Hz  
FIDRES 0.073078 Hz  
AQ 6.842086 sec  
RG 256  
DM 104.400 usec  
DE 6.00 usec  
TE 295.7 K  
D1 1.00000000 sec  
MCREST 0.00000000 sec  
MCMRK 0.01500000 sec

\*\*\*\*\* CHANNEL f1 \*\*\*\*\*  
NUC1 1H  
P1 8.60 usec  
PL1 -2.00 dB  
SFO1 300.1321009 MHz

F2 - Processing parameters  
SI 32768  
SF 300.1300116 MHz  
WDW EM  
SSB 0  
LB 0.30 Hz  
GB 0  
PC 1.00

1D NMR plot parameters  
CX 23.00 cm  
CY 12.50 cm  
FIP 8.743 ppm  
F1 2624.06 Hz  
F2P 1.442 ppm  
F2 432.85 Hz  
APPCM 0.31743 ppm/cm  
-32CM 95.26992 Hz/cm

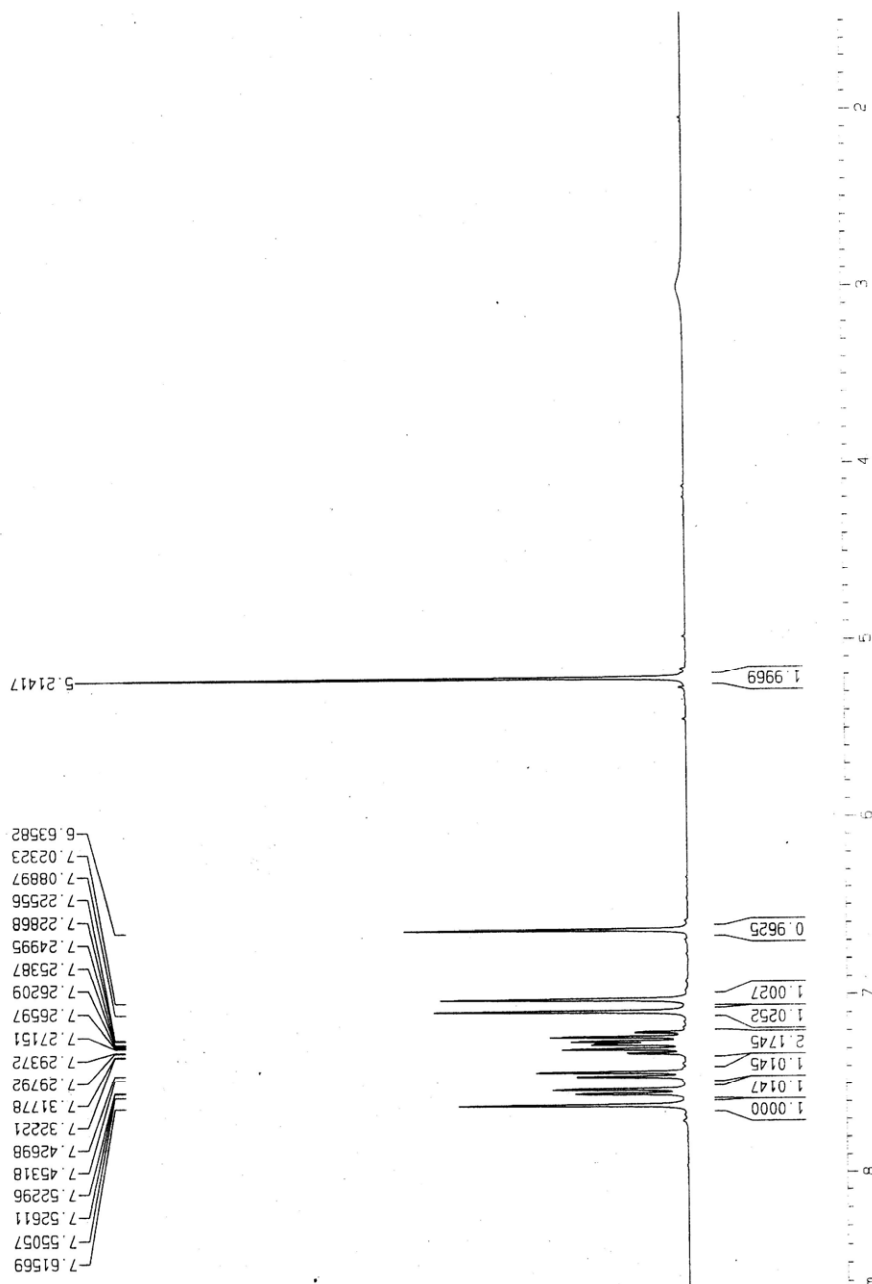



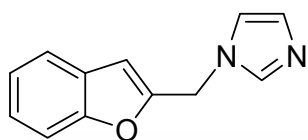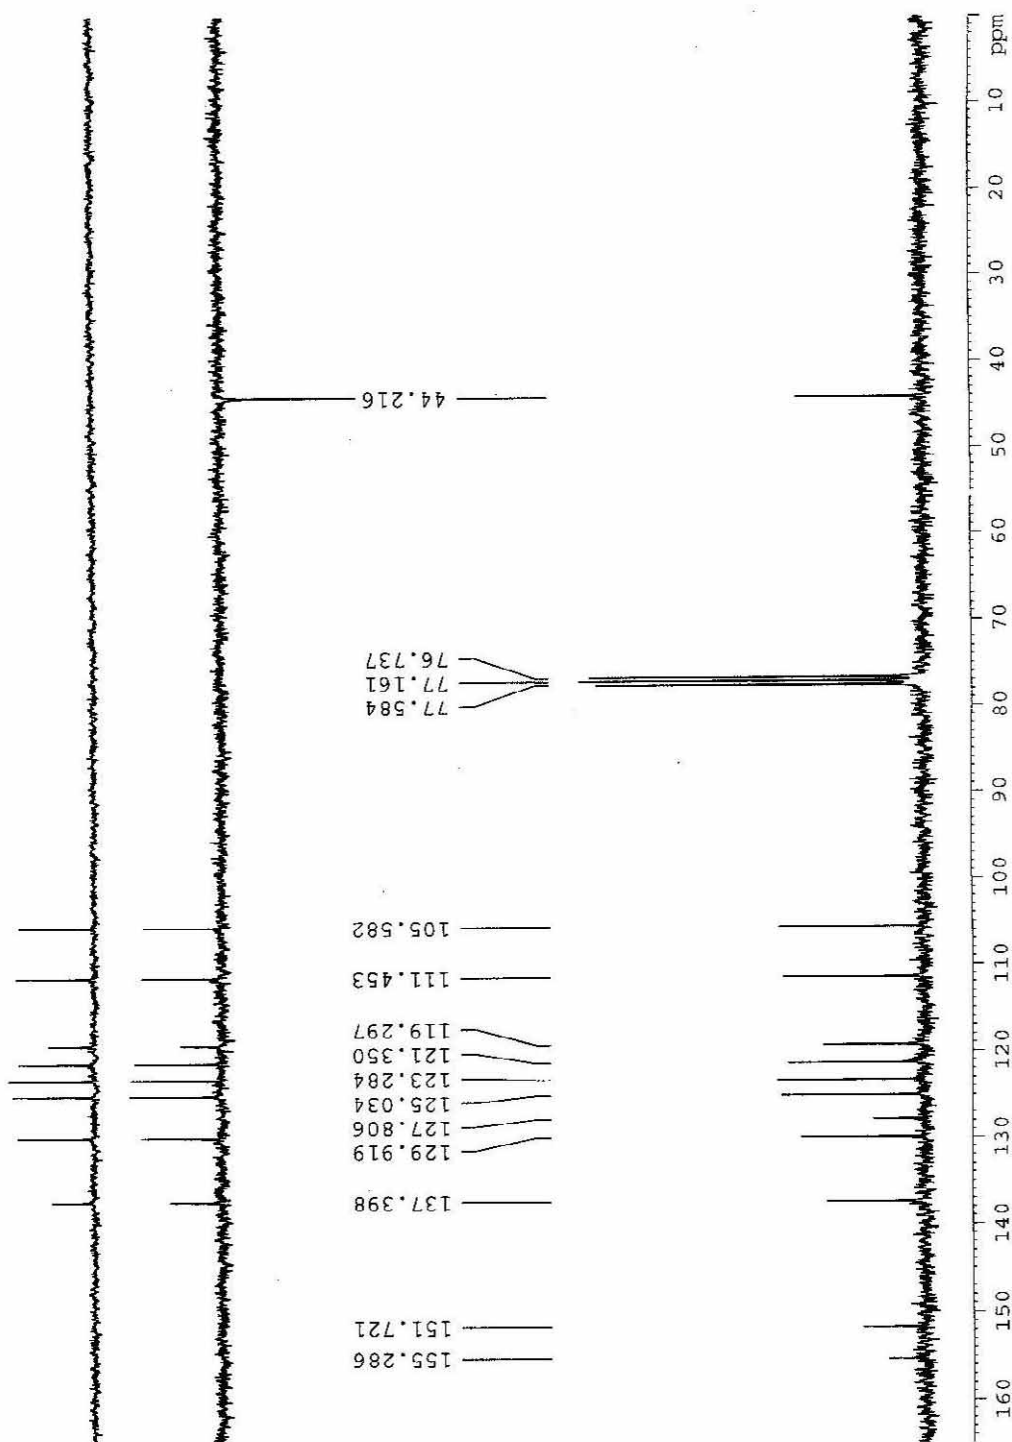

Compound 5  $^1\text{H}$  NMR (300 MHz) and  $^{13}\text{C}$  NMR (75 MHz)

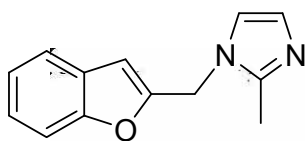

Current Data Parameters  
 NAME SW1  
 EXPRO 60  
 PROCG 1

F2 - Acquisition Parameters  
 Date\_ 20081230  
 Time\_ 12.38  
 INSTRM av300  
 PROBHD 5 mm QNP 1H/13  
 PULPROG zg30  
 TO ES336  
 SOLVENT CDCl3  
 NS 16  
 DS 1  
 SS 4785.272 Hz  
 SMH 0.073078 Hz  
 FIDRES 6.8440086 sec  
 AQ 287.4  
 DM 104.400 usec  
 DE 6.00 usec  
 TE 298.2 K  
 D1 1.0000000 sec  
 ACQRES 0.0000000 sec  
 MCURK 0.0100000 sec

===== CHANNEL f1 =====  
 NUC1 1H  
 P1 6.50 usec  
 PL1 -2.00 dB  
 SFO 300.1321005 MHz

F2 - Processing parameters  
 SI 32768  
 SF 300.1300115 MHz  
 EQ EM  
 SSB 0  
 LB 0.30 Hz  
 GB 0  
 PC 1.00

ID NMR plot parameters  
 CX 23.00 cm  
 CY 12.50 cm  
 FID 8.542 ppm  
 F1 2593.63 Hz  
 F2 4.586 ppm  
 GZ 482.23 Hz  
 HZ 300.1300115 MHz  
 PC 23.00 cm

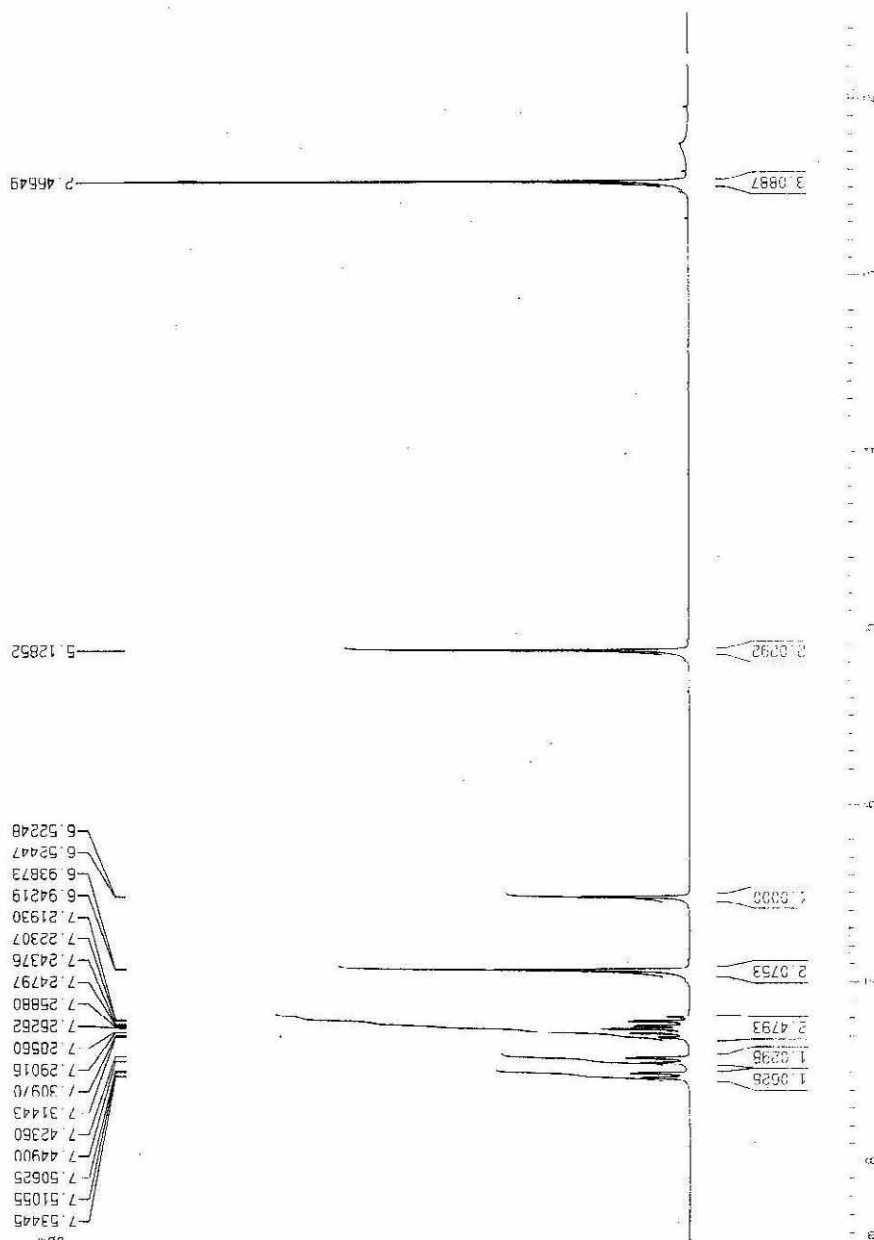

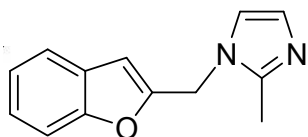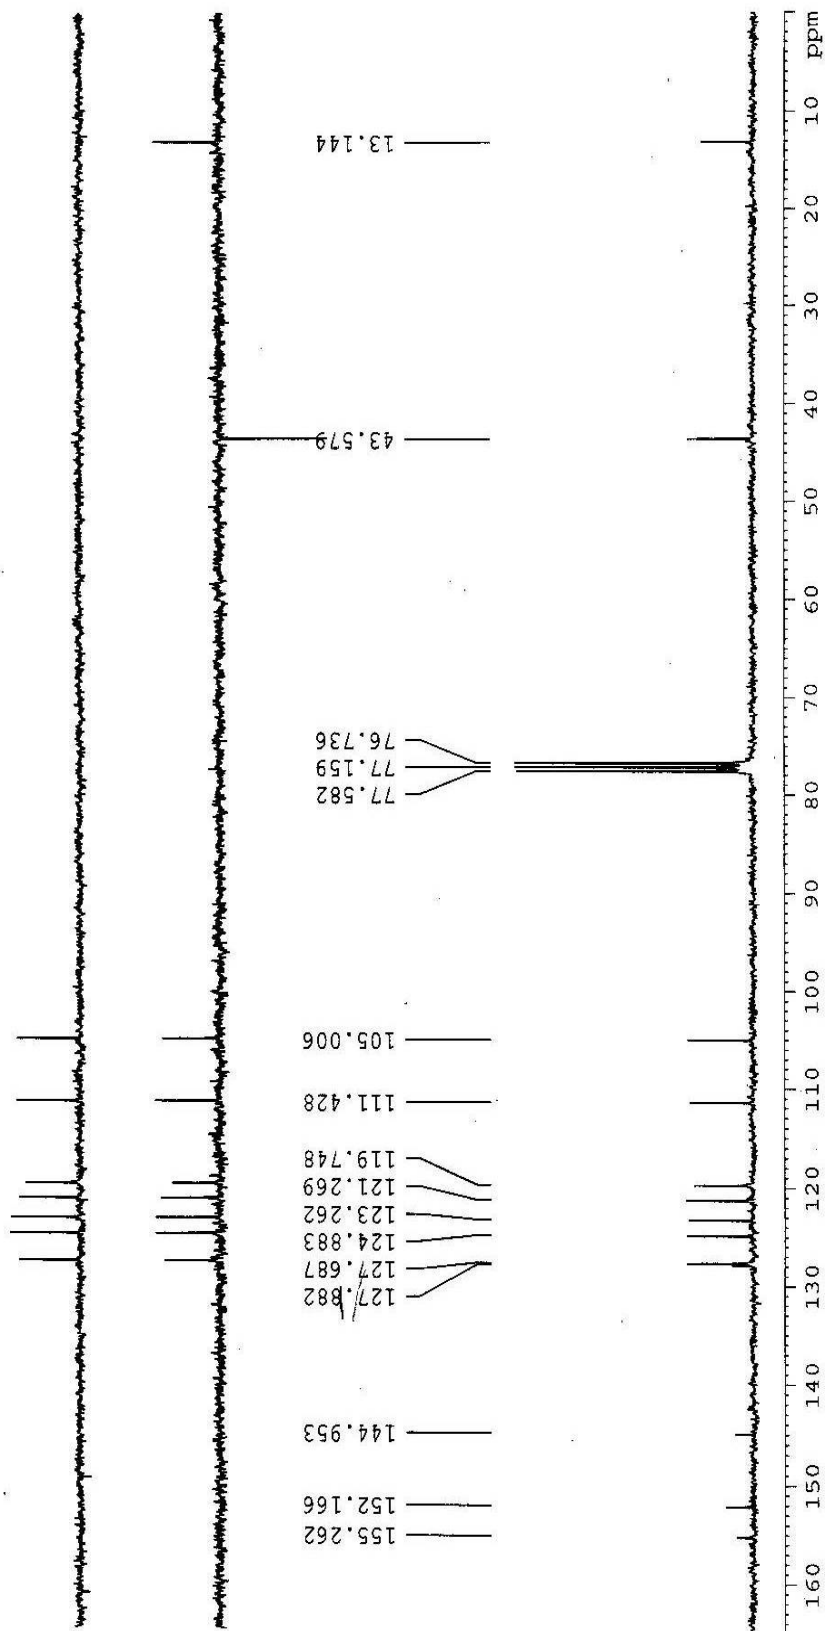

Compound 6 <sup>1</sup>H NMR (300 MHz) and <sup>13</sup>C NMR (75 MHz)

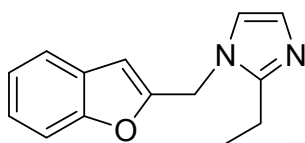

```

Current Data Parameters
NAME          SW1      5W1
EXPNO        56
PROCNO       1

F2 - Acquisition Parameters
Date_         20081230
Time          10.03
INSTRUM      SPC300
PROBHD       5 mm QNP 1H/13
PULPROG      zgpg30
TD           65536
SOLVENT      CDCl3
NS           16
DS           1
SFO          4789.272 Hz
SHH          0.073078 Hz
FIDRES      6.8420086 sec
AQ          287.4
RG          104.400 usec
DE          5.00 usec
TE          298.2 K
JE          1.00000000 sec
JT          0.00000000 sec
MCHEST
MCNMRK      0.01500000 sec

===== CHANNEL f1 =====
NUC1        1H
P1          8.60 usec
PL1         -2.00 dB
SFO1       300.1321009 MHz

F2 - Processing parameters
SI          32768
SF         300.1300113 MHz
WDW         EM
SSB         0
LB         0.30 Hz
GB         0
BB         1.00
-FC

1D NMR plot parameters
CX         23.00 cm
CY         12.50 cm
F1F        8.008 ppm
F1         2401.04 Hz
ZG         0.000 ppm
ZC         0.06 Hz
=====
NAME          0.34165 ppm
PROCNO       104
=====
    
```

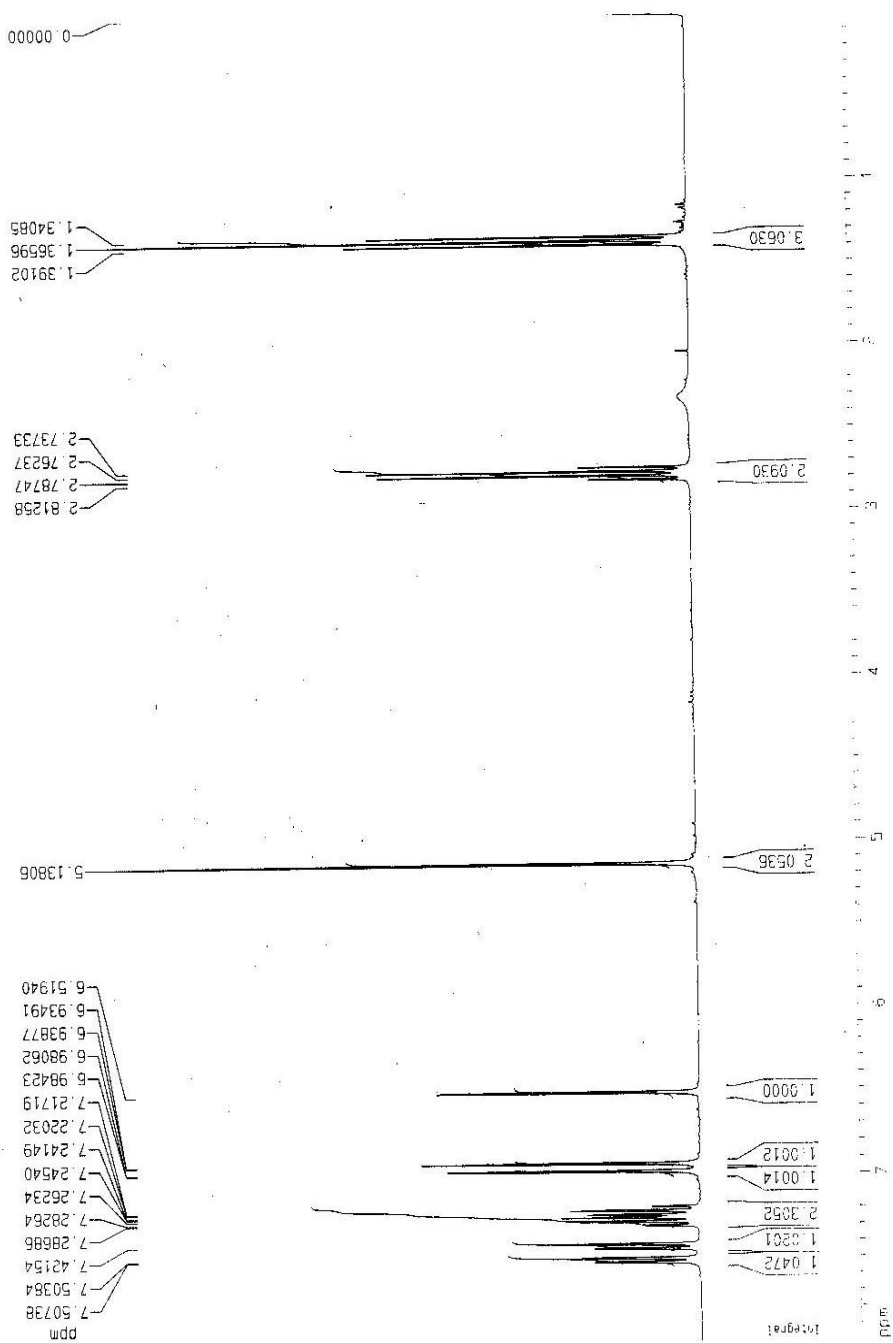

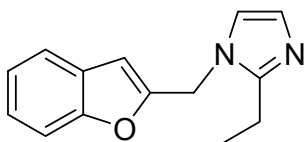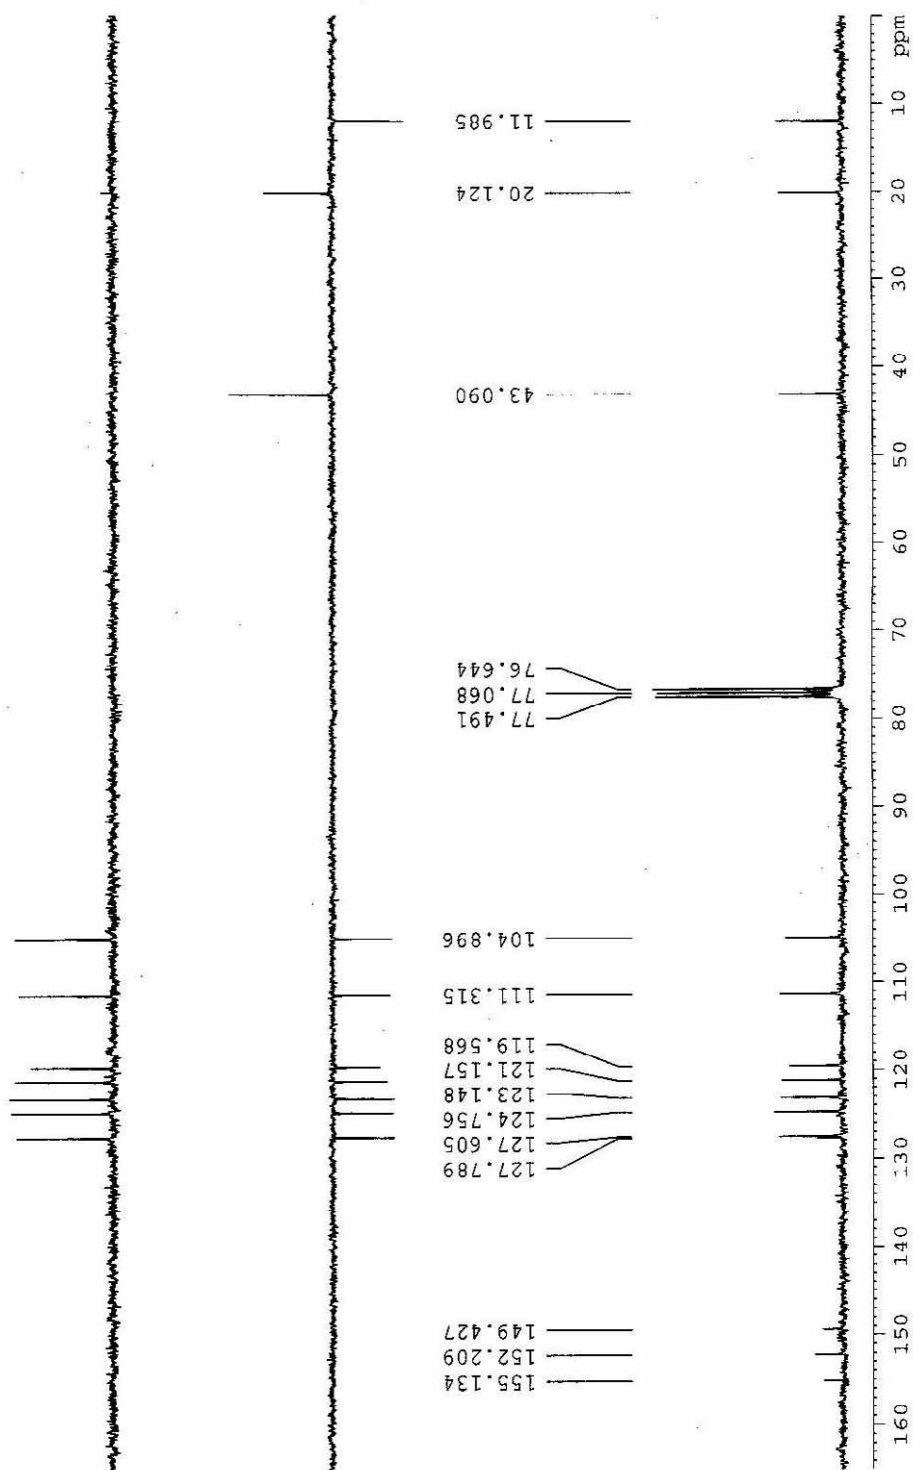

Compound 7  $^1\text{H}$  NMR (300 MHz) and  $^{13}\text{C}$  NMR (75 MHz)

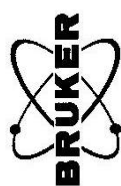

Current Data Parameters  
EXPNO 2  
PROCNO 1  
F2 - Acquisition Parameters  
Date\_ 20090723  
Time 0.39  
INSTRUM mv300  
PROBHD 5 mm QNP 1H/13  
PULPROG zgpg30  
TD 65536  
AQ 0.5516  
RG 327.5  
AS 16  
US 4798.272 Hz  
FS 0.021078 Hz  
AQ 6.8420048 sec  
RG 327.5  
DM 104.900 usec  
DE 255.0 K  
TE 300.2 K  
D1 1.0000000 sec  
DELTA 0.0000000 sec  
PC 0.0150000 sec  
MCORR1 0.0150000 sec  
----- CHANNEL f1 -----  
NUC1 13C  
P1 8.00 usec  
PL1 0.00 dB  
SFO1 300.1320000 MHz  
F2 - Processing parameters  
SI 32768  
SF 300.1320000 MHz  
WDW EM  
SSB 0  
GB 0  
PC 1.00

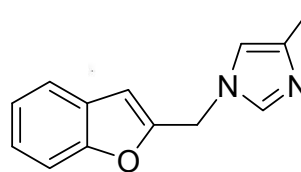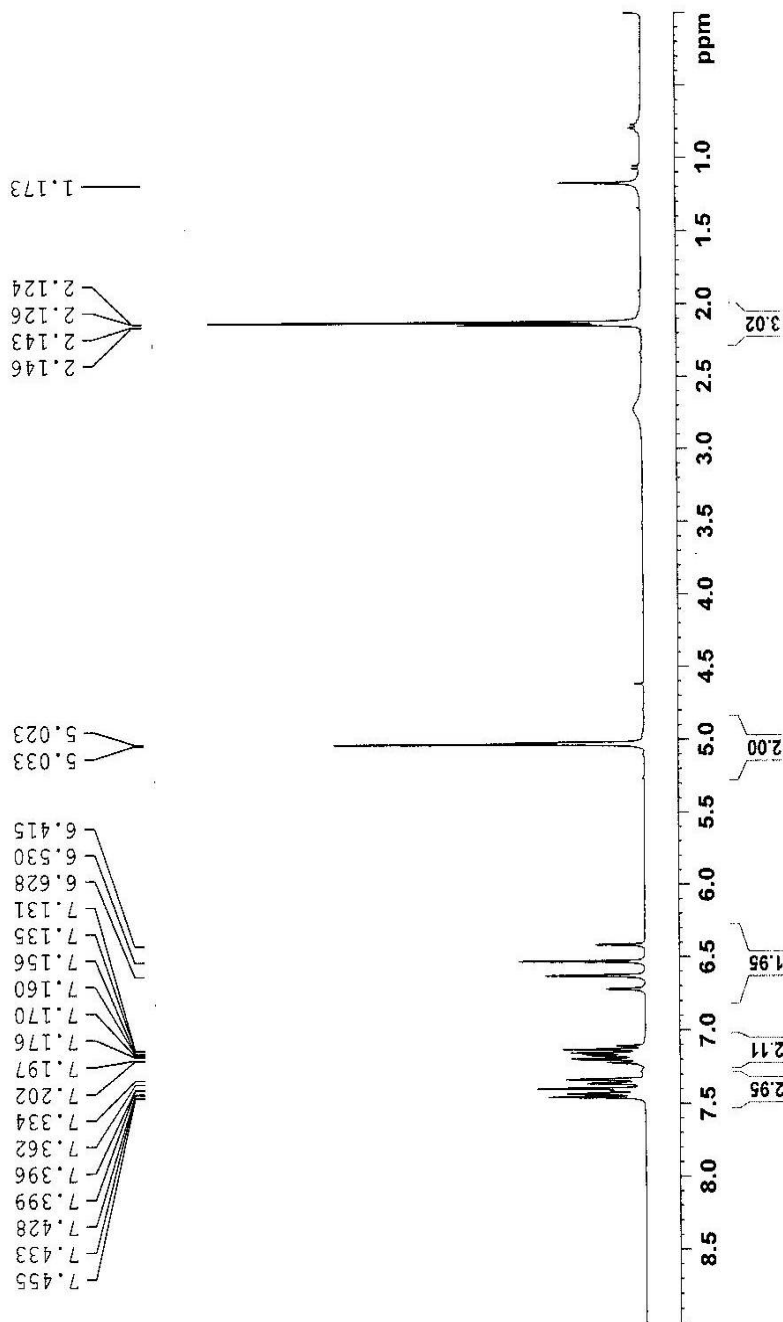

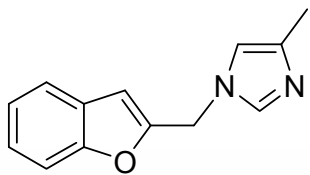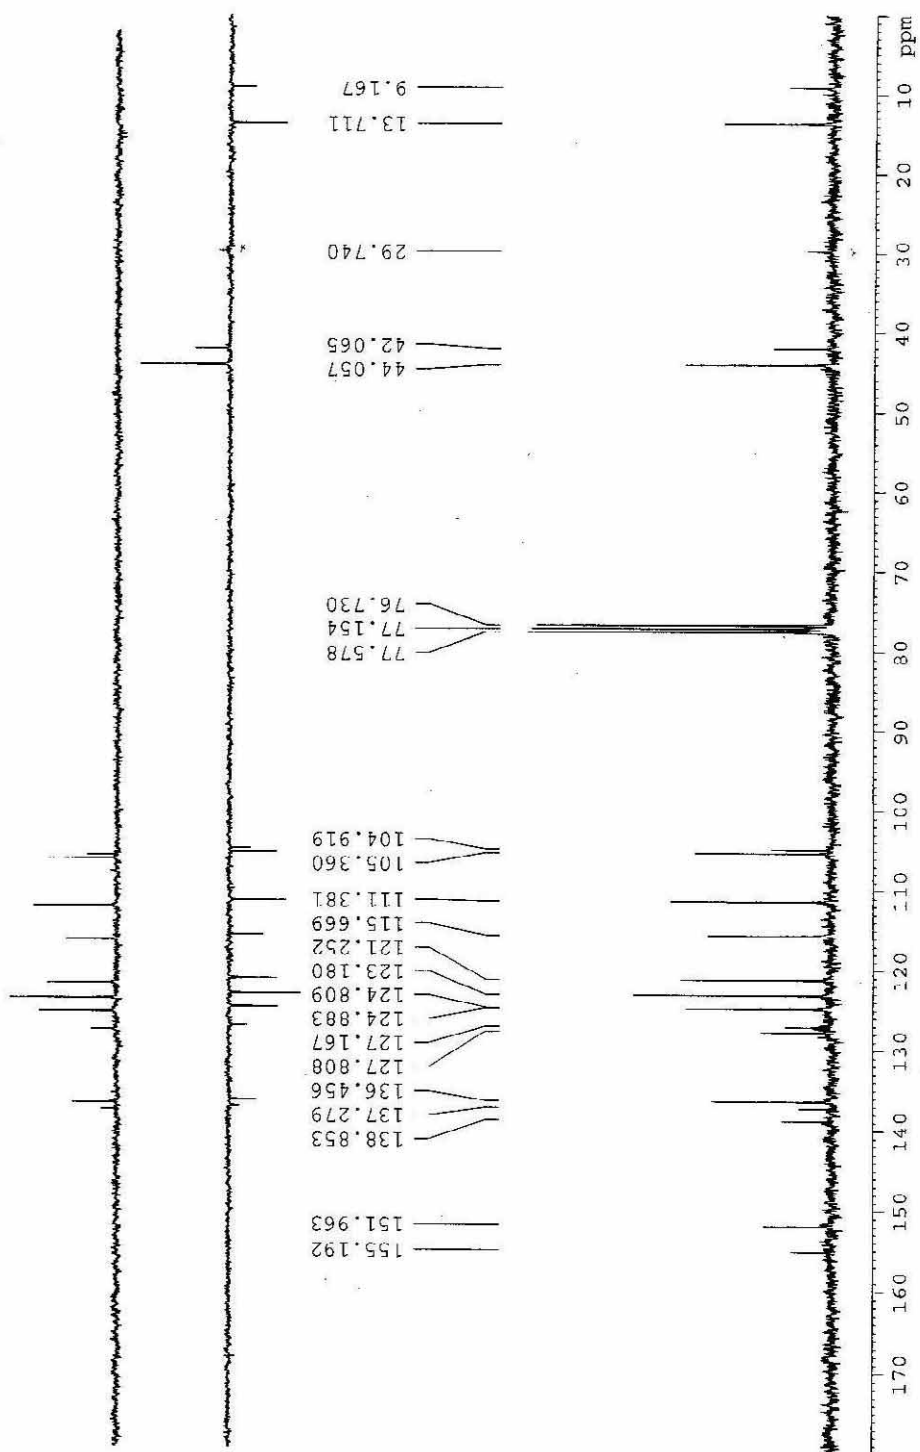

Compound 9 <sup>1</sup>H NMR (300 MHz) and <sup>13</sup>C NMR (75 MHz)

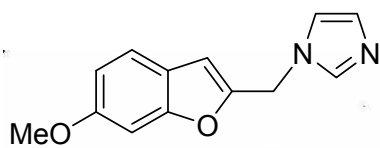

Current Data Parameters  
 NAME SW 170  
 EXPNO 1  
 PROCNO 1

F2 - Acquisition Parameters  
 Date\_ 20090609  
 Time 8.59  
 INSTRUM av300  
 PROBHD 5 mm QNP 1H/13  
 PULPROG zgpg30  
 TD 65536  
 SOLVENT DMS-D3  
 NS 16  
 DS 1  
 SWH 4785.272 Hz  
 FIDRES 0.073078 Hz  
 AQ 6.6420086 sec  
 RG 64  
 DM 104.400 usec  
 DE 5.00 usec  
 TE 296.0 K  
 D1 1.0000000 sec  
 MCREST 0.0000000 sec  
 MCPRK 0.0150000 sec

===== CHANNEL f1 =====  
 NUC1 1H  
 P1 9.60 usec  
 PL1 -2.00 dB  
 SFO1 300.1321019 MHz

F2 - Processing parameters  
 SI 32766  
 SF 300.1302270 MHz  
 WDW EM  
 SSB 0  
 LB 0.30 Hz  
 GB 0  
 PC 1.00

1D NMR plot parameters  
 CX 23.00 CF  
 CY 12.50 CF  
 F1P 61.737 ppm  
 F1 2622.24 Hz  
 F2P 2.007 ppm  
 F2 602.46 Hz  
 PPMCK 0.29259 ppm/cm  
 HZCK 87.81630 Hz/cm

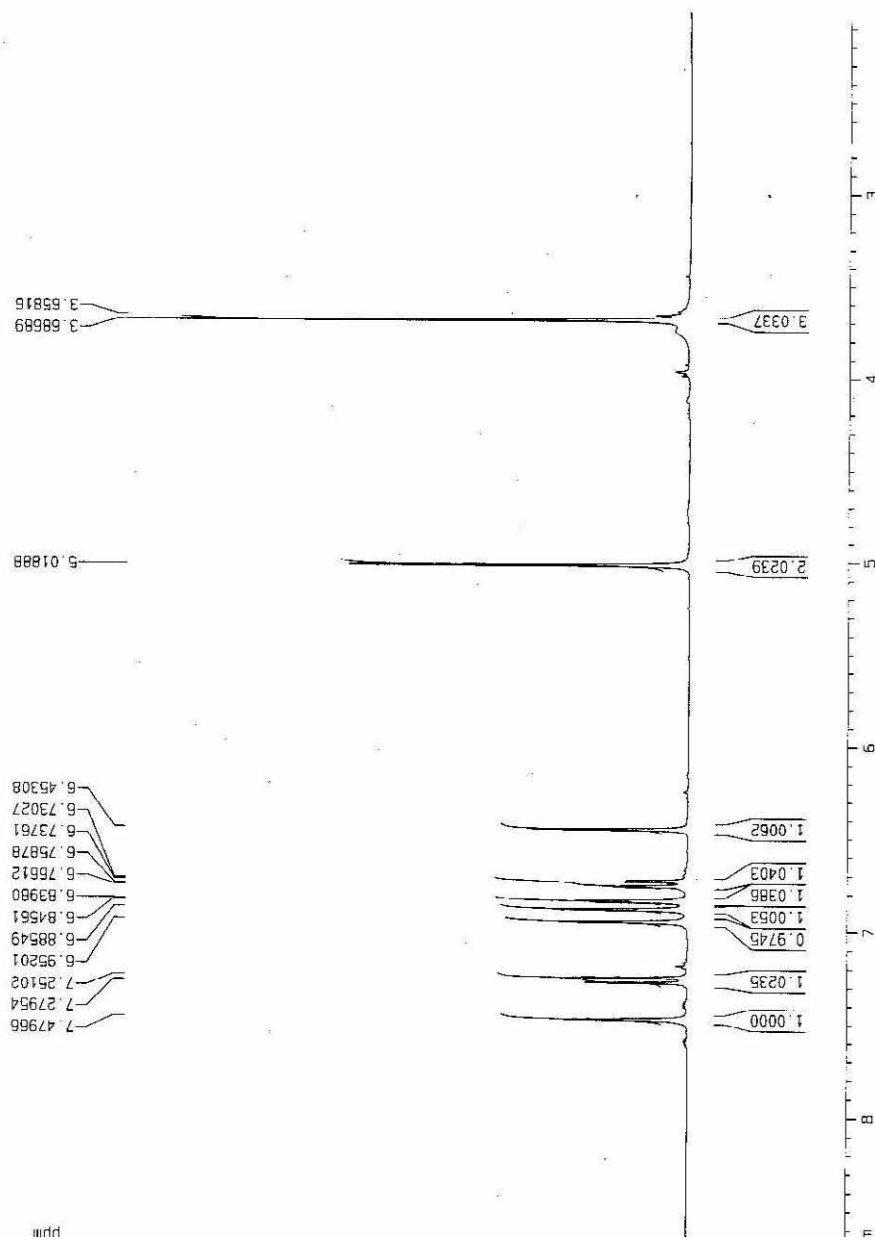



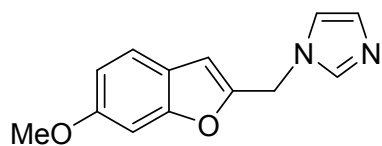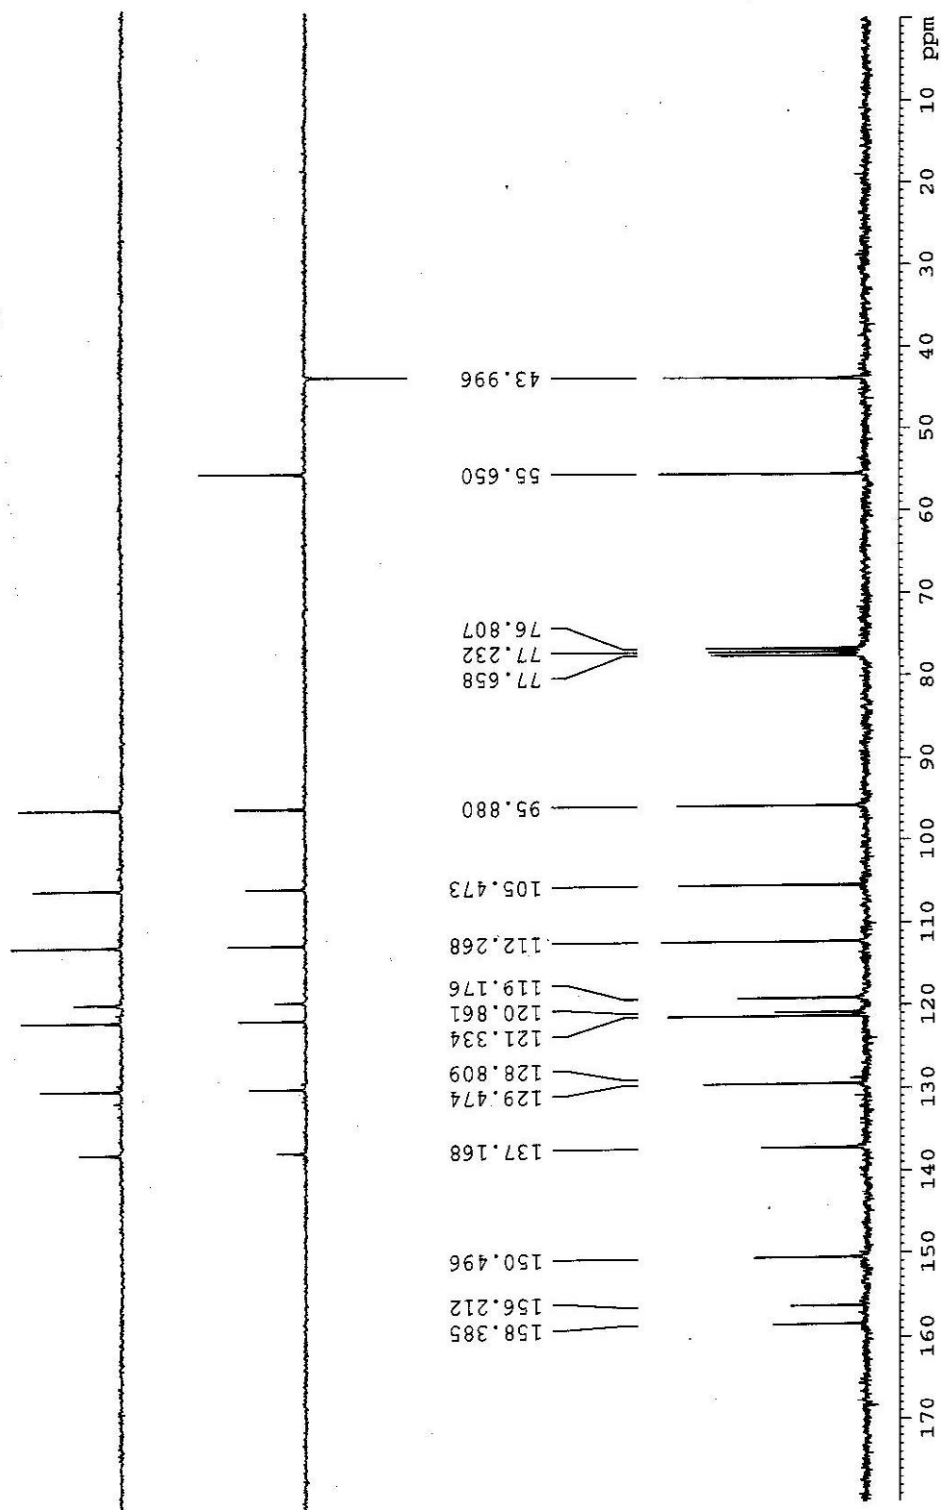

Compound 10  $^1\text{H}$  NMR (300 MHz) and  $^{13}\text{C}$  NMR (75 MHz)

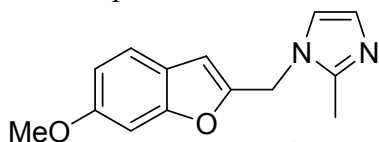

Current Data Parameters  
 NAME 5M1  
 EXPNO 227  
 PROCNO 1

F2 - Acquisition Parameters  
 Date\_ 20090622  
 Time 10.41  
 INSTRUM av300  
 PROBHD 5 mm QNP 1H/13  
 PULPROG zgpg30  
 TO 55536  
 SOLVENT CDCl3  
 NS 16  
 DS 4  
 SWH 4789.272 Hz  
 FIDRES 0.0773078 Hz  
 AQ 6.8420086 sec  
 RG 161.3  
 DM 104.400 usec  
 DE 6.00 usec  
 TE 300.5 K  
 D1 1.0000000 sec  
 MCREST 0.0000000 sec  
 MCMRK 0.0150000 sec

===== CHANNEL f1 =====  
 NUC1  $^1\text{H}$   
 P1 8.60 usec  
 PL1 -2.00 dB  
 SFO1 300.1321009 MHz

F2 - Processing parameters  
 SI 32768  
 SF 300.1300271 MHz  
 HDW 0  
 EN 0  
 SSB 0  
 B 0.30 Hz  
 GB 0  
 PC 1.00

ID NMR plot parameters  
 CX 21.00 cm  
 CY 12.50 cm  
 FIP 7.587 ppm  
 F1 2277.23 Hz  
 F2P 1.598 ppm  
 F2 479.71 Hz  
 PPMCM 0.25040 ppm/cm  
 HZCM 76.15296 Hz/cm

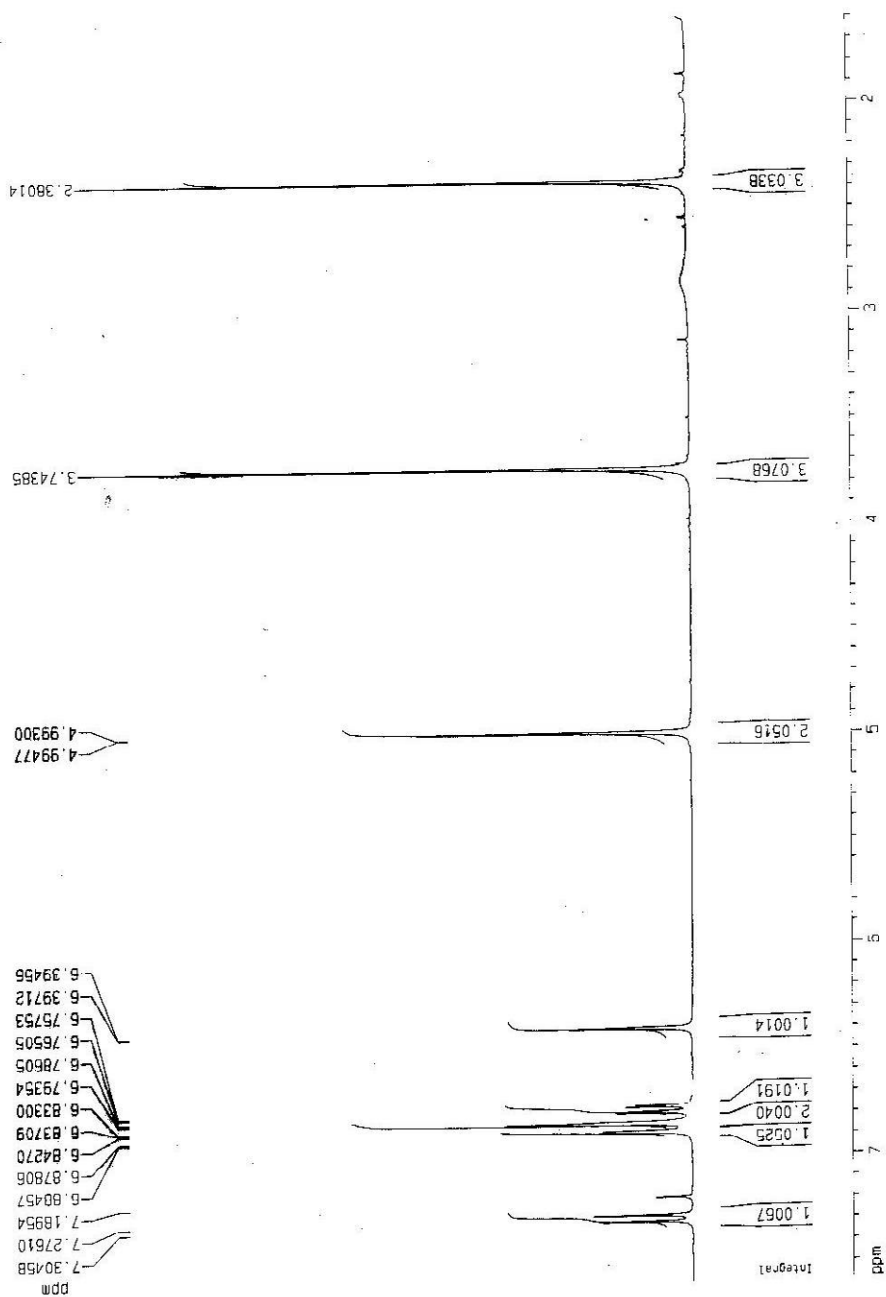

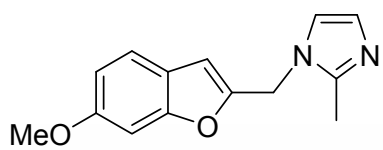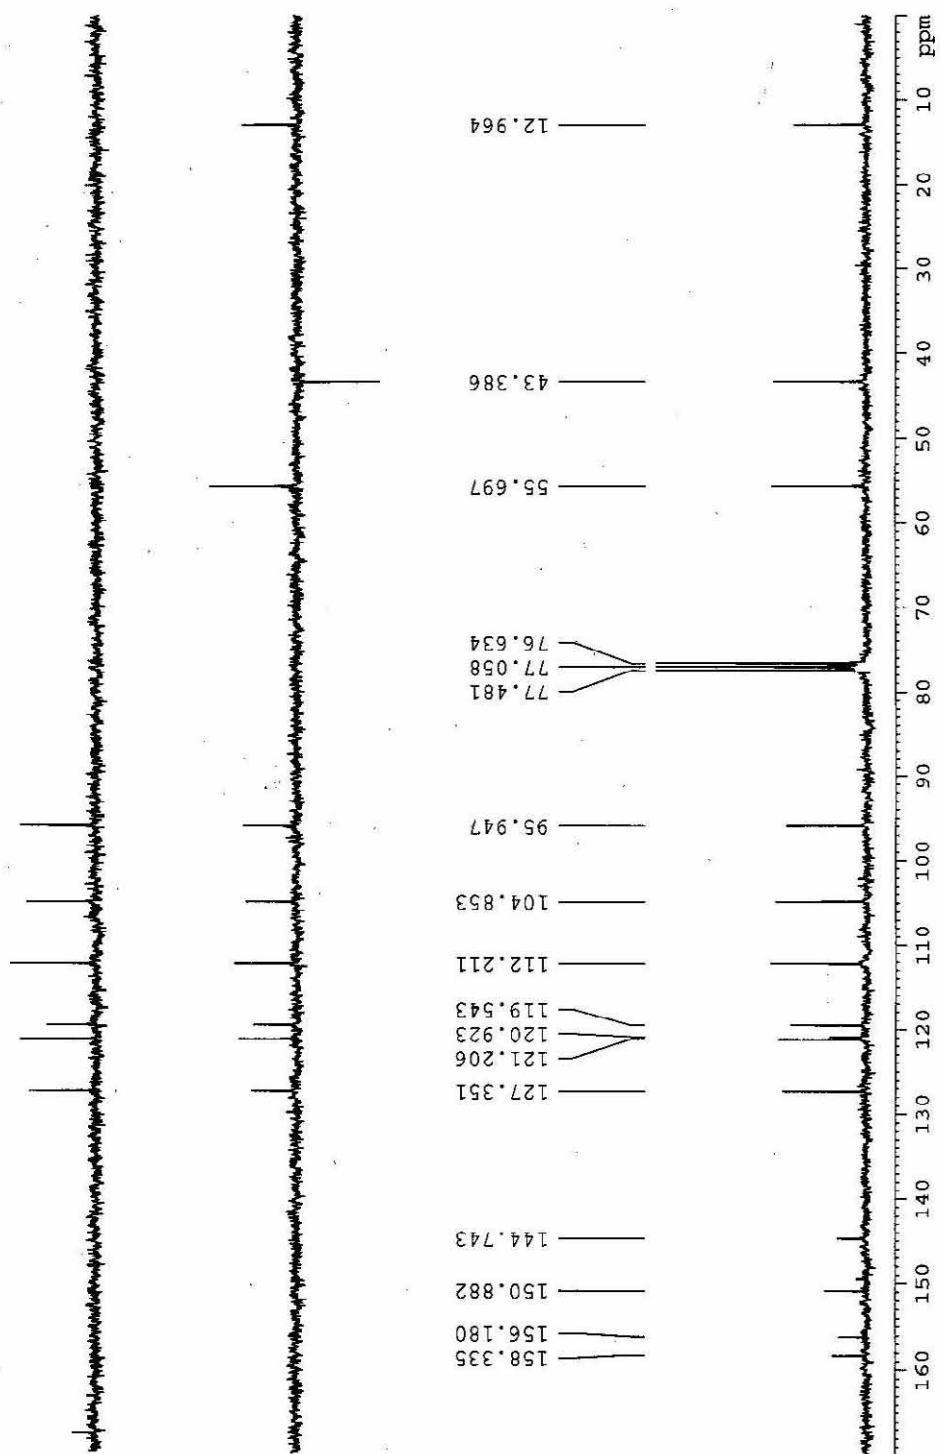

Compound 11  $^1\text{H}$  NMR (300 MHz) and  $^{13}\text{C}$  NMR (75 MHz)

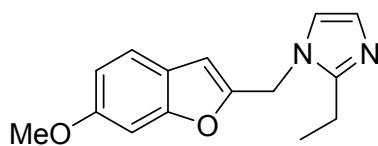

Current Data Parameters  
 NAME SWJ  
 EXPNO 221  
 PROCNO 1

F2 - Acquisition Parameters  
 Date\_ 20090622  
 Time\_ 10.13  
 INSTRUM 400  
 PROBHD 5 mm QNP 1H/13  
 PULPROG zgpg  
 TC 65536  
 SCLVNT CDCl3  
 NE 16

DE 1  
 SWH 4789.272 Hz  
 FIDRES 0.073078 Hz  
 AQ 6.8423086 sec  
 RG 114  
 DM 104.400 usec  
 DE 5.00 usec  
 TE 300.4 K  
 D1 1.00000000 sec  
 MCREST 0.00000000 sec  
 MCWFK 0.01500000 sec

===== CHANNEL f1 =====  
 NUC1 1H  
 P1 8.60 usec  
 PL1 -2.00 dB  
 SF01 300.1321009 MHz

F2 - Processing parameters  
 S 32758  
 SF 300.1300209 MHz  
 NDW 0  
 SSB 0  
 LB 0.30 Hz  
 GB 0  
 PC 1.00

1D NMR plot parameters  
 CX 23.00 cm  
 CY 12.50 cm  
 FIDP 7.695 ppm  
 F1 230659 Hz  
 F2 0.571 ppm  
 F2 171.33 Hz  
 PPMHM 0.30576 ppm/cm  
 FZCM 52.96794 Hz/cm

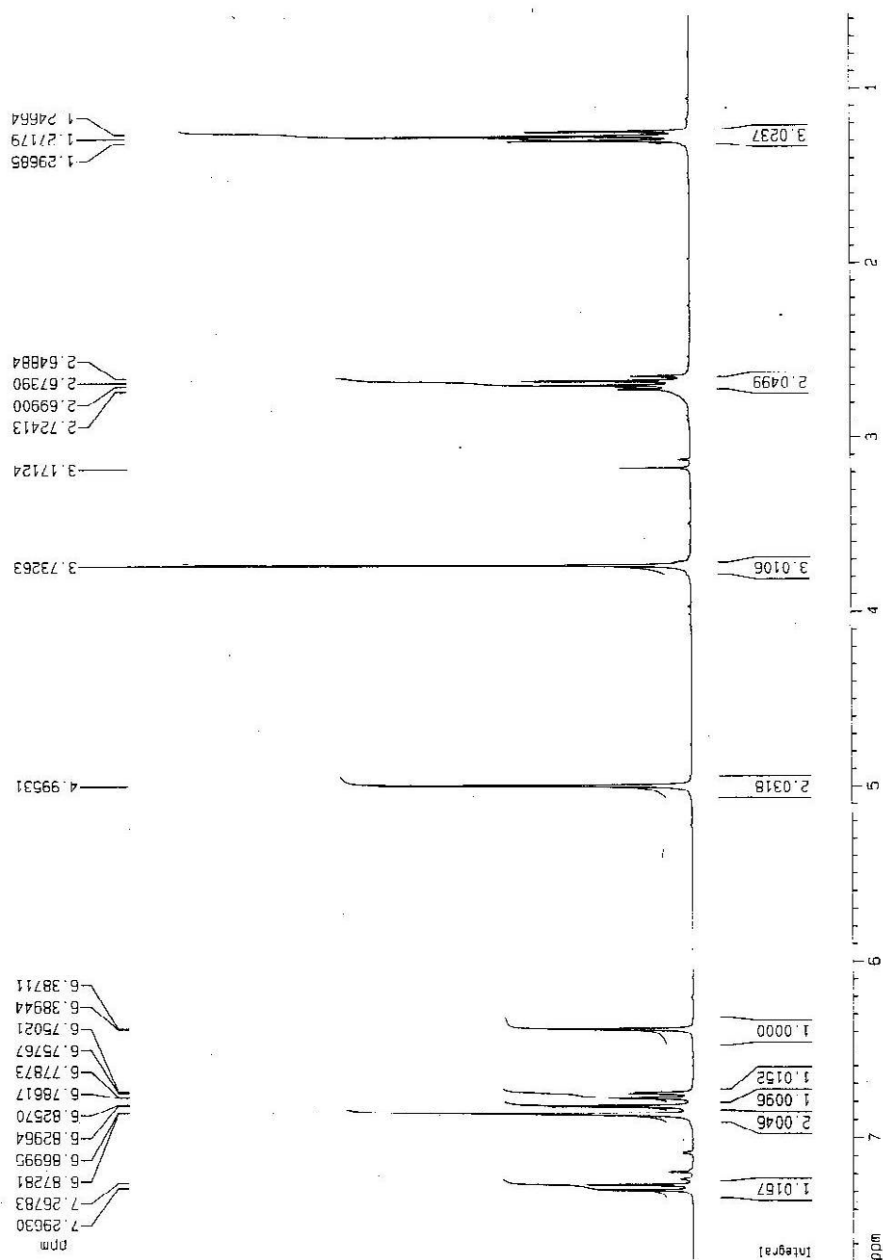

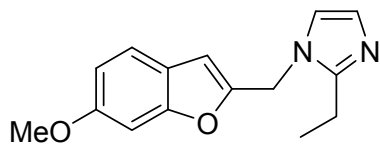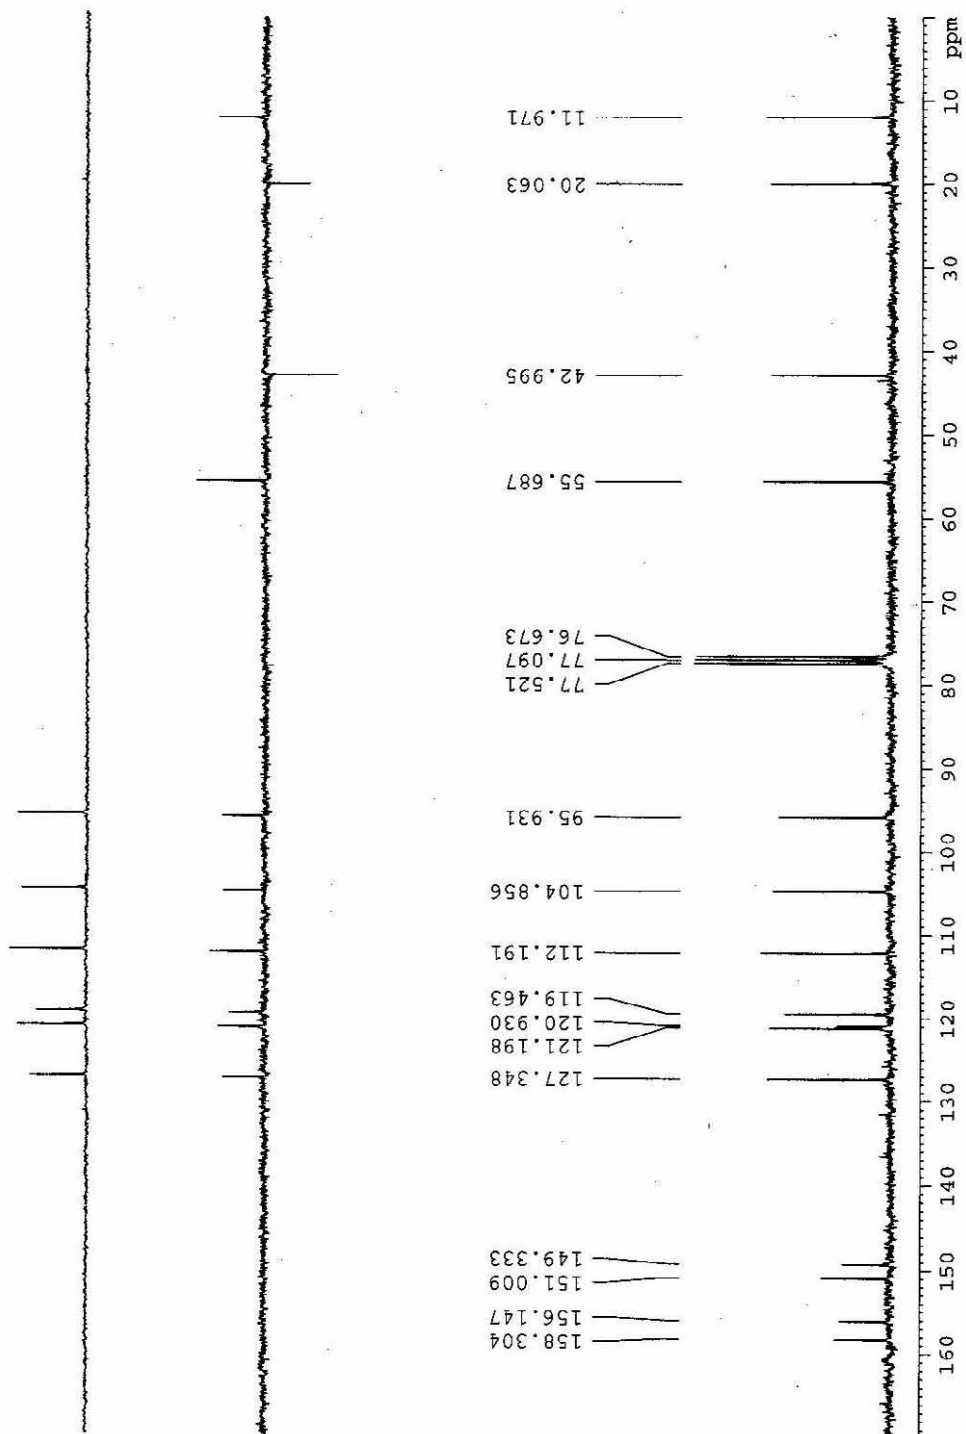

Compound 12  $^1\text{H}$  NMR (300 MHz) and  $^{13}\text{C}$  NMR (75 MHz)

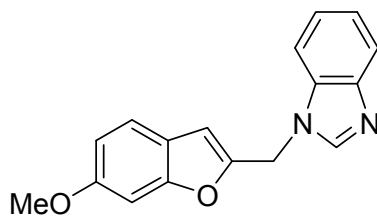

Current Data Parameters  
NAME av3  
EXPNO 165  
PROCNO 1

F2 - Acquisition Parameters  
Date\_ 20090611  
Time 11.01  
INSTRUM av300  
PROBHD 5 mm QNP 1H/13  
PULPROG zg30  
TD 65536  
SOLVENT CDCl3  
NS 16  
DS 1  
SWH 4769.272 Hz  
FIDRES 0.073078 Hz  
AQ 6.8420086 sec  
RG 406.4  
DM 104.400 USEC  
DE 6.00 USEC  
TE 297.1 K  
D1 1.00000000 sec  
ACREST 0.00000000 sec  
MCPRK 0.01500000 sec

\*\*\*\*\* CHANNEL f1 \*\*\*\*\*  
NUC1 1H  
P1 8.60 USEC  
PL1 -2.00 DB  
SFO1 300.1321009 MHz

F2 - Processing parameters  
SI 32768  
SF 300.1300278 MHz  
WDW EM  
SSB 0  
LB 0.30 Hz  
GB 0  
PC 1.00

ID NMR plot parameters  
CX 23.00 cm  
CY 12.50 cm  
F1P B.558 ppm  
F1 2580.50 Hz  
F2P 3.097 ppm  
F2 529.60 Hz  
PRM1 0.23315 ppm/cm  
HZCM 71.77825 Hz/cm

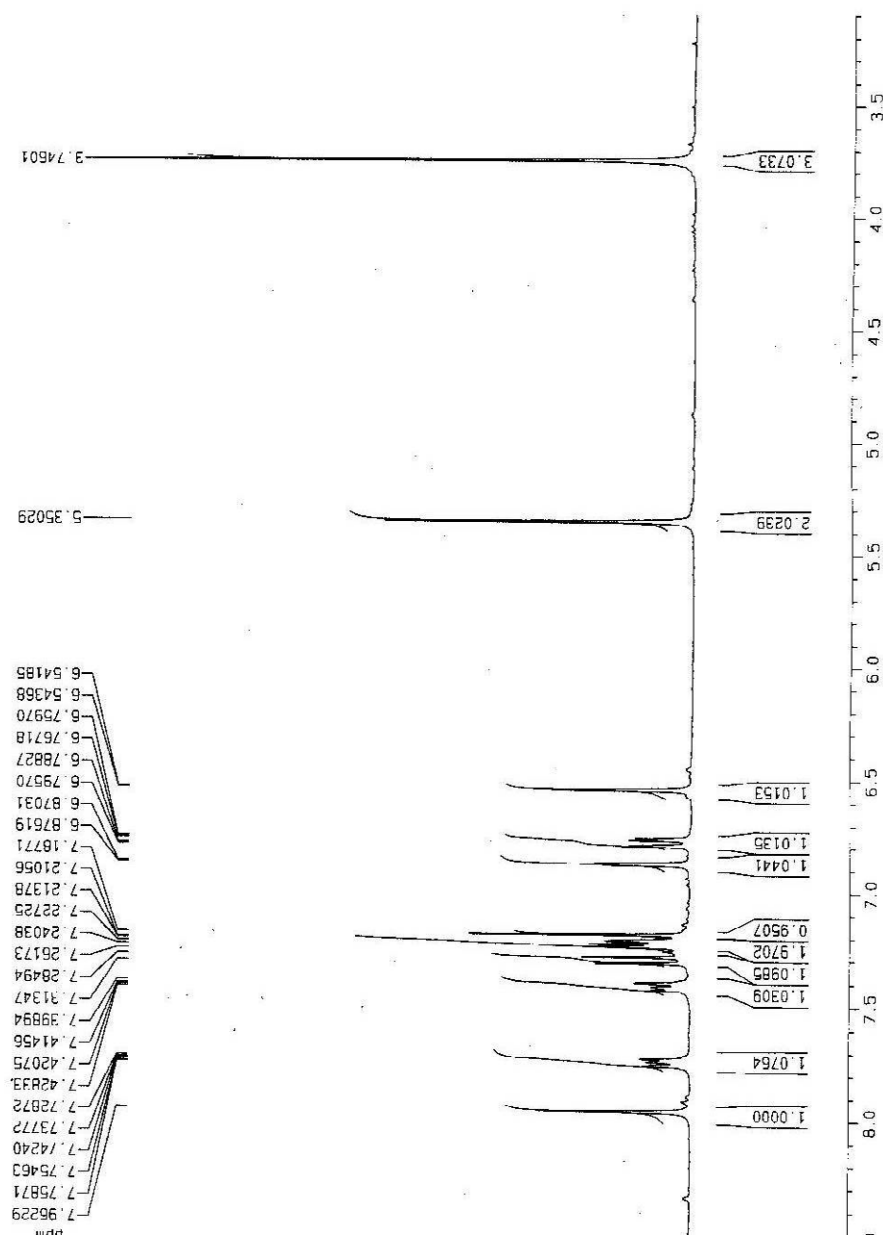

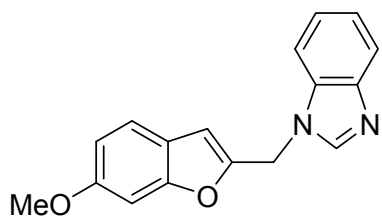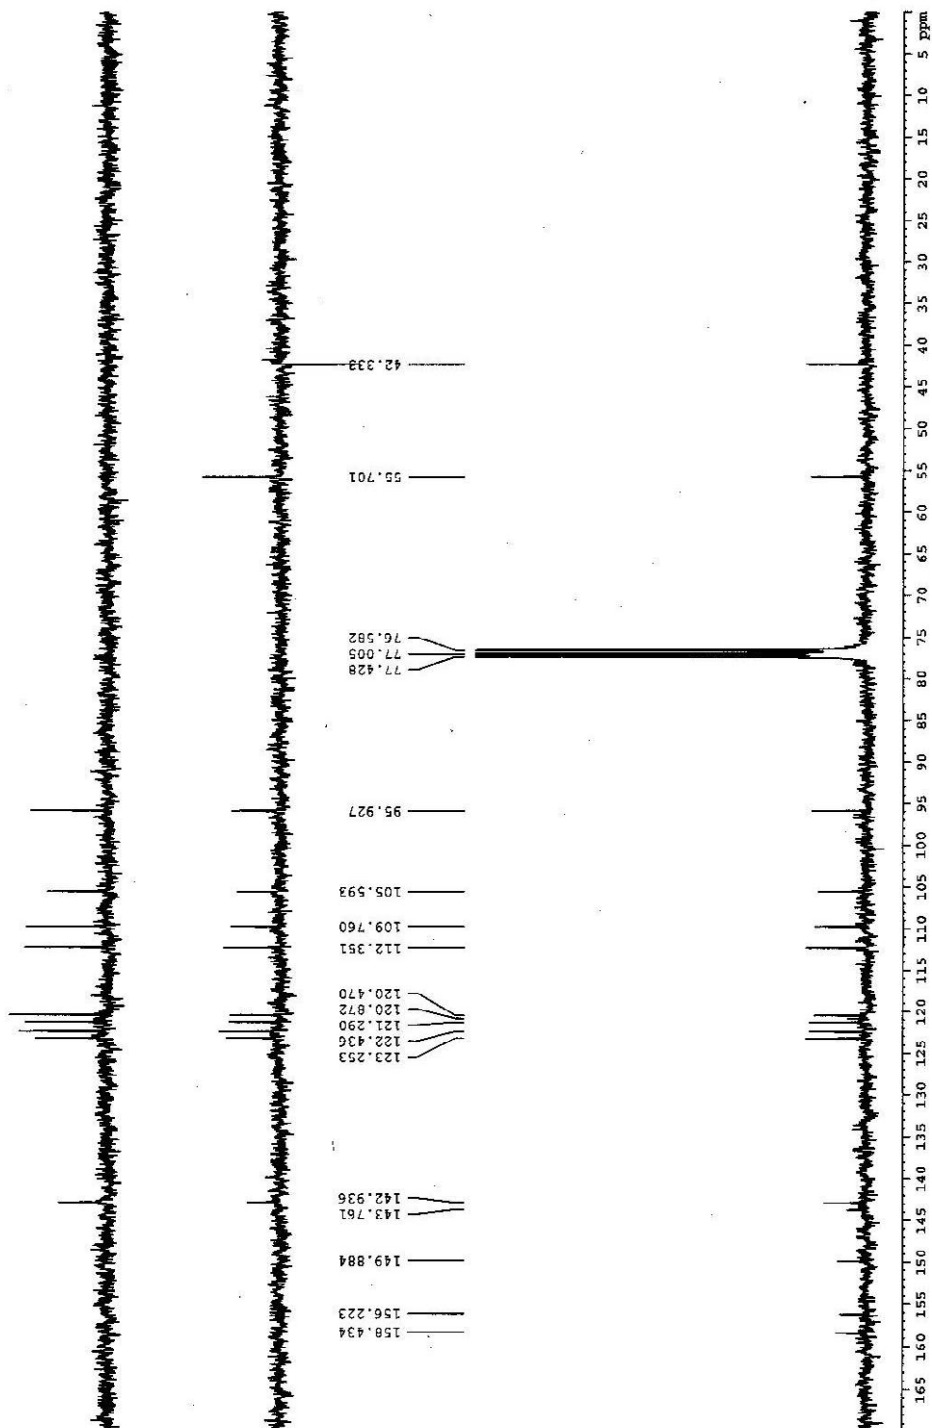

Compound 13  $^1\text{H}$  NMR (300 MHz) and  $^{13}\text{C}$  NMR (75 MHz)

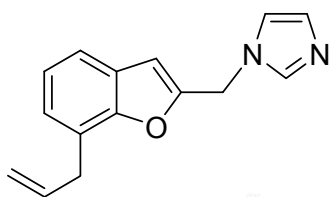

Current Data Parameters  
 NAME: SW1  
 EXPNO: 64  
 PROCNO: 1

F2 - Acquisition Parameters  
 Date\_: 20091209  
 Time: 12.26  
 INSTRUM: av300  
 PROBHD: 5 mm QNP 1H/13  
 PULPROG: zg30  
 TD: 65536  
 SOLVENT: CDCl3  
 NS: 16  
 DS: 1  
 SWH: 4789.272 Hz  
 FIDRES: 0.073078 Hz  
 AQ: 6.842086 Sec  
 RG: 256  
 OB: 104.400 usec  
 DE: 6.00 usec  
 TE: 295.5 K  
 D1: 1.0000000 Sec  
 MCBST: 0.6000000 Sec  
 PCPRG: 0.01500000 Sec

\*\*\*\*\* CHANNEL f1 \*\*\*\*\*  
 NUC1: 1H  
 P1: 8.60 usec  
 PL1: -2.00 dB  
 SFO: 300.1321009 MHz

F2 - Processing parameters  
 SI: 32768  
 SF: 300.1300282 MHz  
 WDW: EM  
 SSB: 0  
 LB: 0.30 Hz  
 GB: 0  
 PC: 1.00

1D NMR plot parameters  
 CX: 23.00 cm  
 CY: 12.50 cm  
 F1P: 7.960 ppm  
 F1: 2375.99 Hz  
 F2P: 3.135 ppm  
 F2: 940.77 Hz  
 PPM0: 0.20806 ppm/cm  
 L2L: 62.44404 Hz/cm

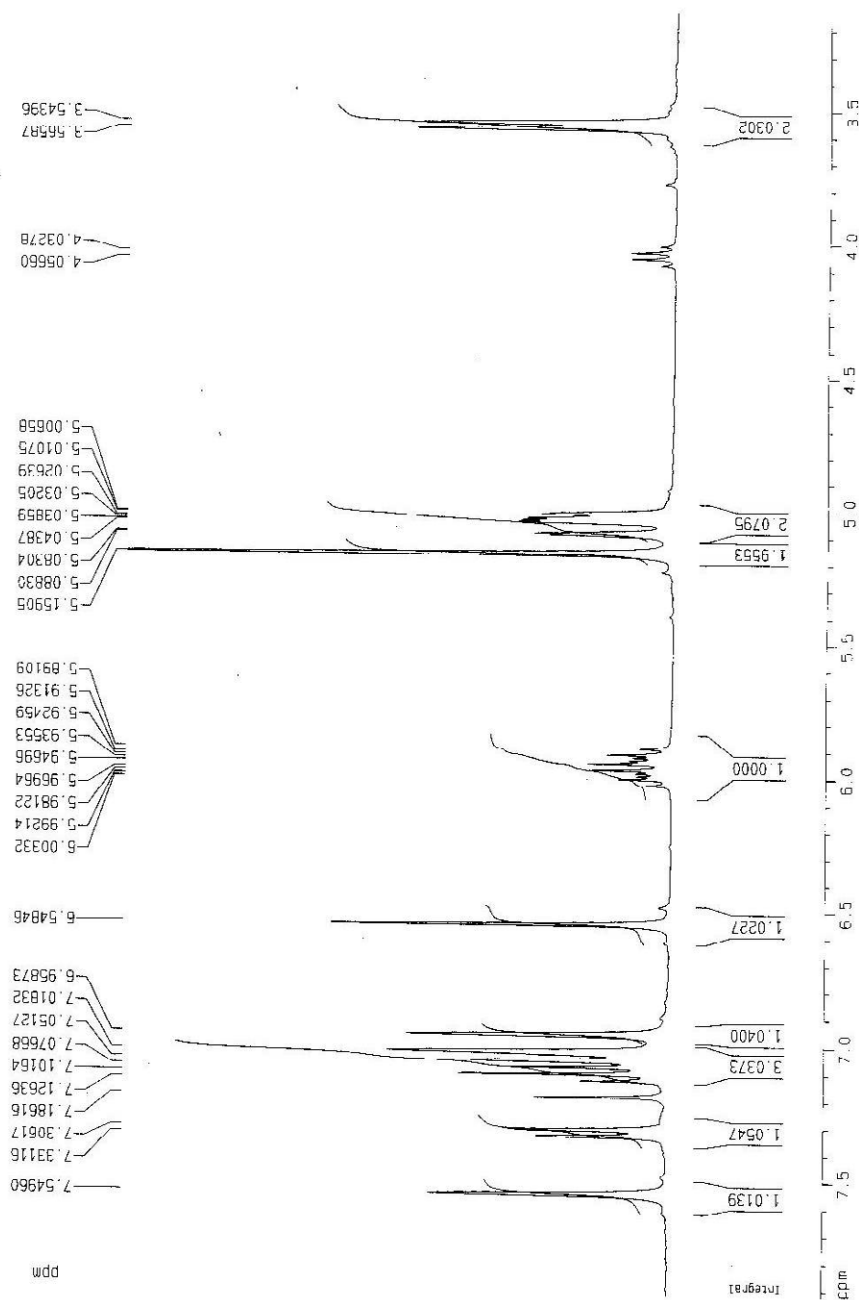



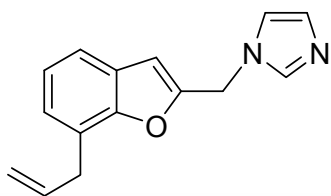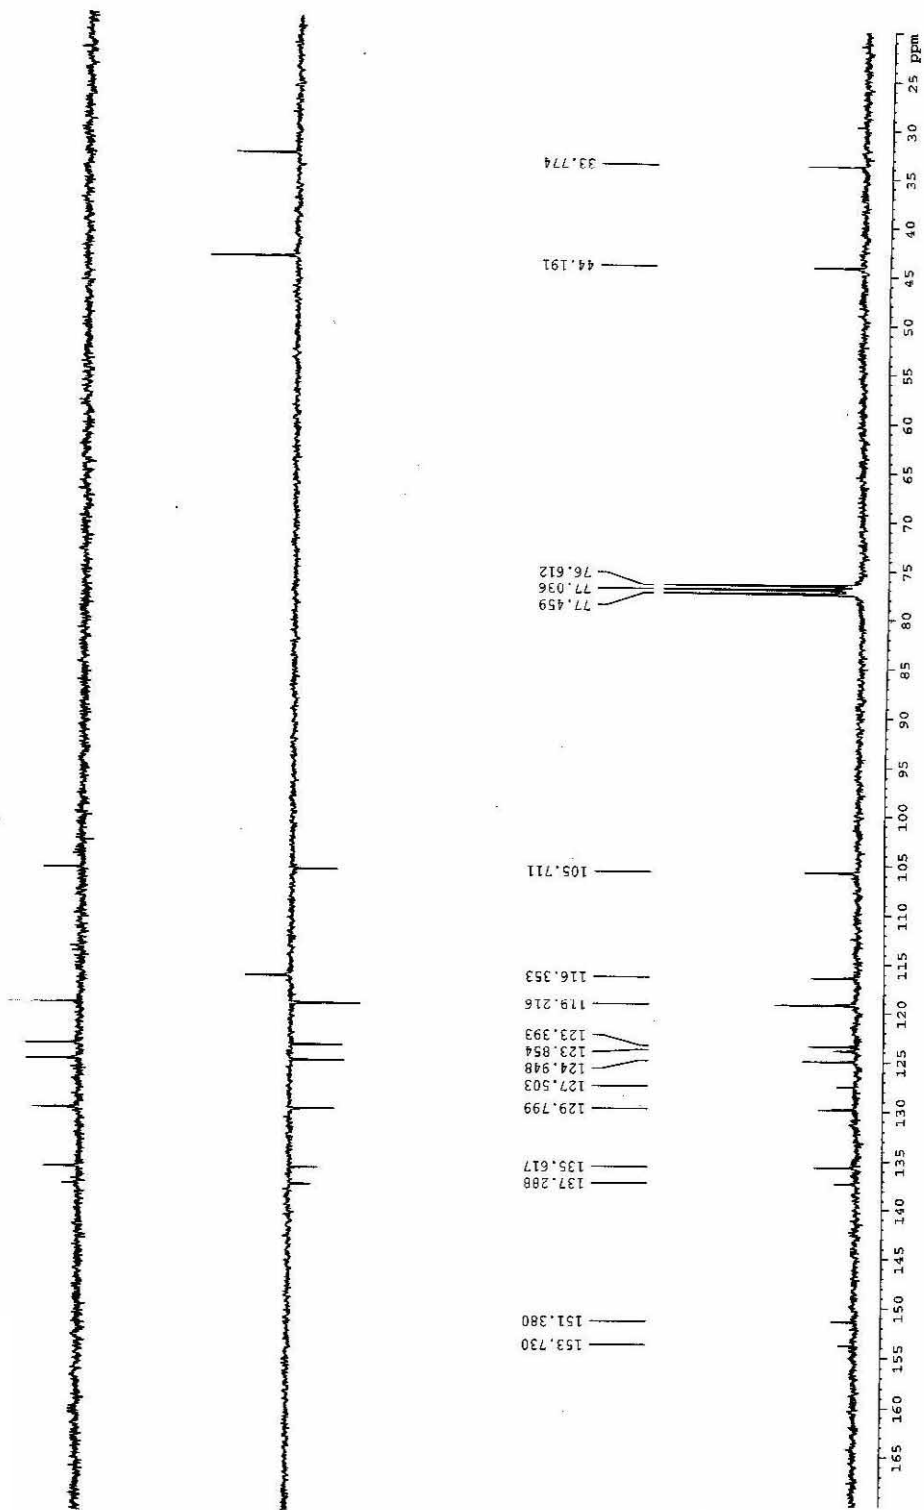

Compound 14  $^1\text{H}$  NMR (300 MHz) and  $^{13}\text{C}$  NMR (75 MHz)

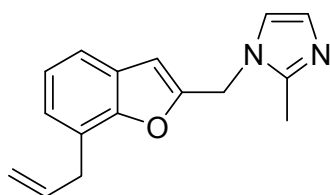

Current: Data Parameters  
 NAME: 7B  
 EXPNO: 1  
 PROCNO: 1  
 F2 - Acquisition Parameters  
 Date\_ : 20100115  
 Time : 23.08  
 INSTRUM : avco  
 PROBHD : 5 mm QNP 1H/13  
 PULPROG : zgpg30  
 TD : 65536  
 SOLVENT : CDCl3  
 NS : 16  
 DS : 1  
 SWH : 4789.272 Hz  
 FIDRES : 0.073078 Hz  
 AQ : 6.8420086 sec  
 RG : 101.5  
 DQ : 104.400 usec  
 DE : 6.400 usec  
 TE : 298.3 K  
 D1 : 0.0300000 sec  
 ACQRES : 0.0000000 sec  
 MCWPRG : 0.01500000 sec  
 ===== CHANNEL f1 =====  
 NUC1 : 1H  
 P1 : 8.60 usec  
 PL1 : -2.00 dB  
 SF01 : 300.1321009 MHz  
 F2 - Processing parameters  
 SI : 32768  
 SF : 300.1300505 MHz  
 WDW : EM  
 SSB : 0  
 LB : 0.30 Hz  
 GB : 0  
 PC : 1.00  
 1D NMR plot parameters  
 CX : 23.00 cm  
 CY : 12.50 cm  
 F1 : 7.852 ppm  
 F2 : 2355.62 Hz  
 ZP : 1.915 ppm  
 Z2 : 254.21 Hz  
 PRGM : 0.27690 ppm/cm  
 FZCM : 93.10482 Hz/cm

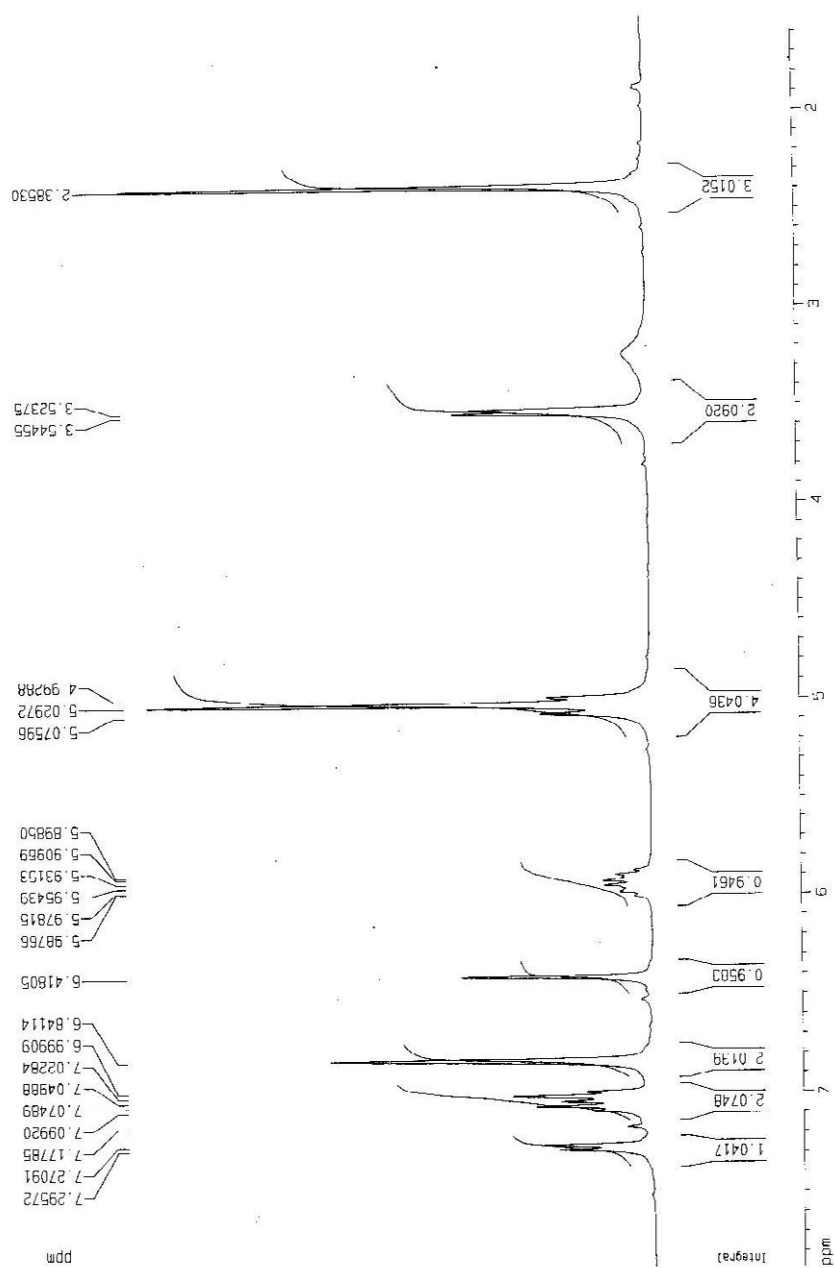

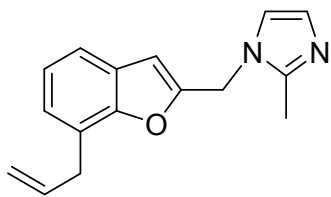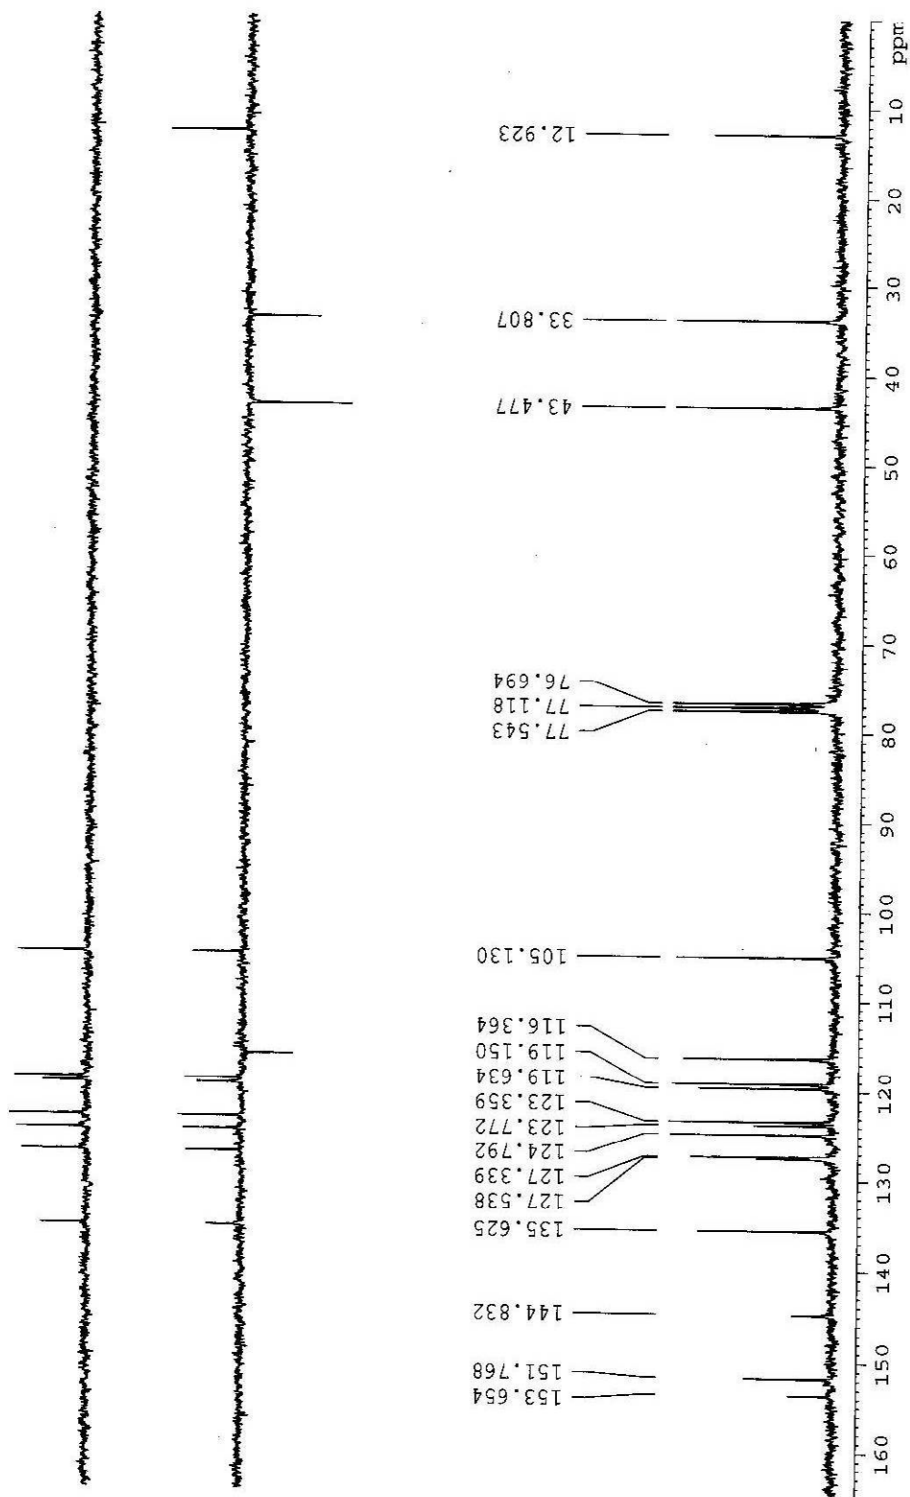

Compound 15  $^1\text{H}$  NMR (300 MHz) and  $^{13}\text{C}$  NMR (75 MHz)

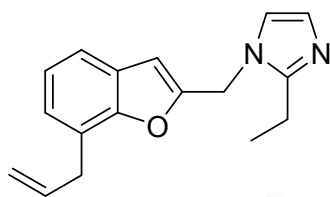

Current Data Parameters  
 NAME swj  
 EXPNO 75  
 PROCNO 1

F2 - Acquisition Parameters  
 Date\_ 20091230  
 Time 12.30  
 INSTRUM er300  
 PROBHD 5 mm QNP 1H/13  
 PULPROG zg30  
 TD 65536  
 SOLVENT CDC13  
 NS 16  
 DS 1  
 SMH 4789.272 Hz  
 FIDRES 0.073078 Hz  
 AQ 6.8420085 sec  
 RG 30.6  
 DM 104.400 usec  
 DE 5.00 usec  
 TE 295.3 K  
 O1 1.00000000 sec  
 ACQRES 0.00000000 sec  
 NUC1 13C  
 CHANNEL f1

===== CHANNEL f1 =====  
 NUC1 13C  
 P1 8.60 usec  
 PL1 -2.00 dB  
 SFO1 300.1321009 MHz

F2 - Processing parameters  
 S1 32768  
 SF 300.1300029 MHz  
 MDW EM  
 SSB 0  
 LB 0.30 Hz  
 GB 0  
 PC 1.00

1D NMR plot parameters  
 CX 23.00 cm  
 CY 12.50 cm  
 F1 8.158 ppm  
 F2P 2448.59 Hz  
 F2 2.155 ppm  
 F2P 647.22 Hz  
 PRGM 0.25065 ppm/cm  
 HCN 78.32045 Hz/cm

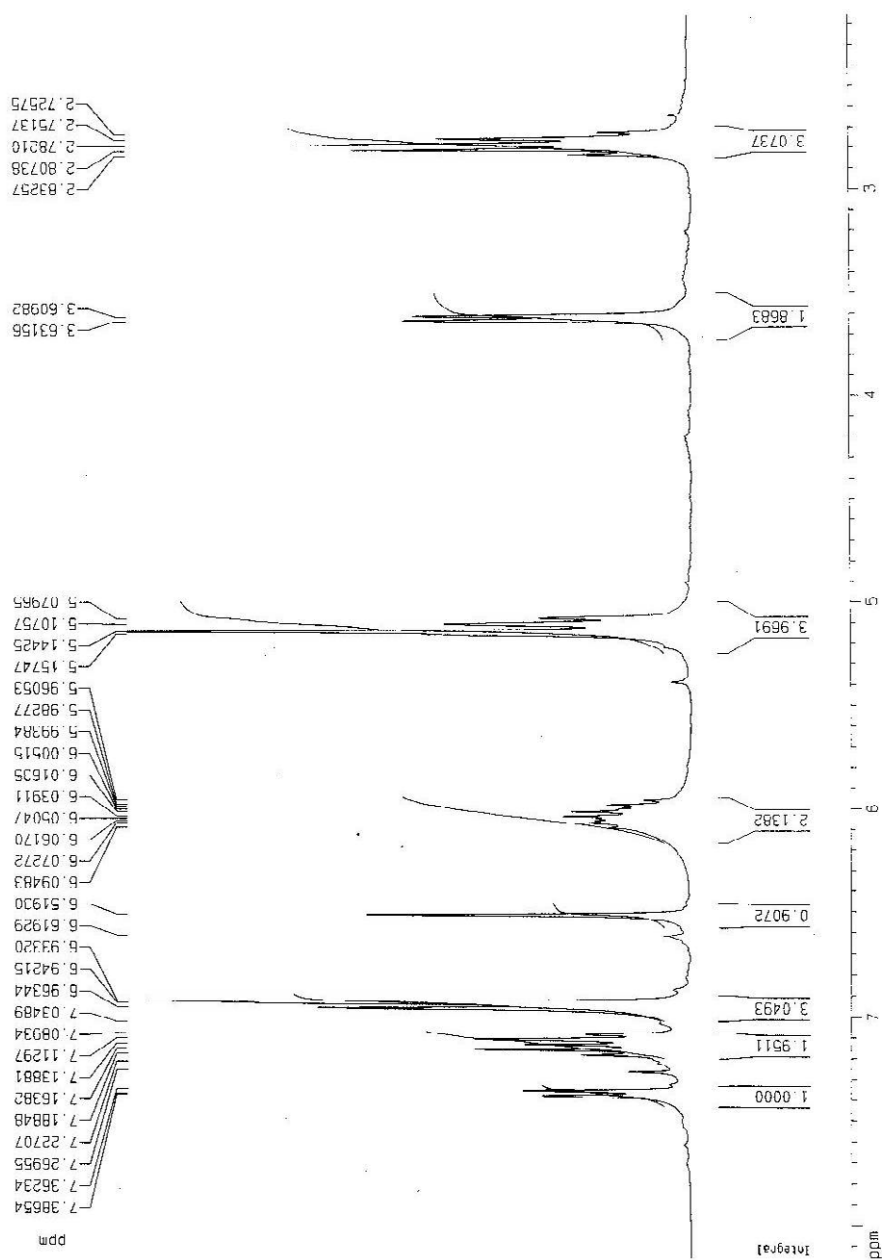

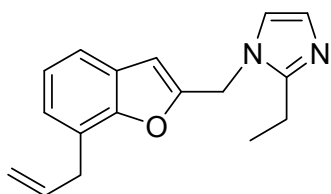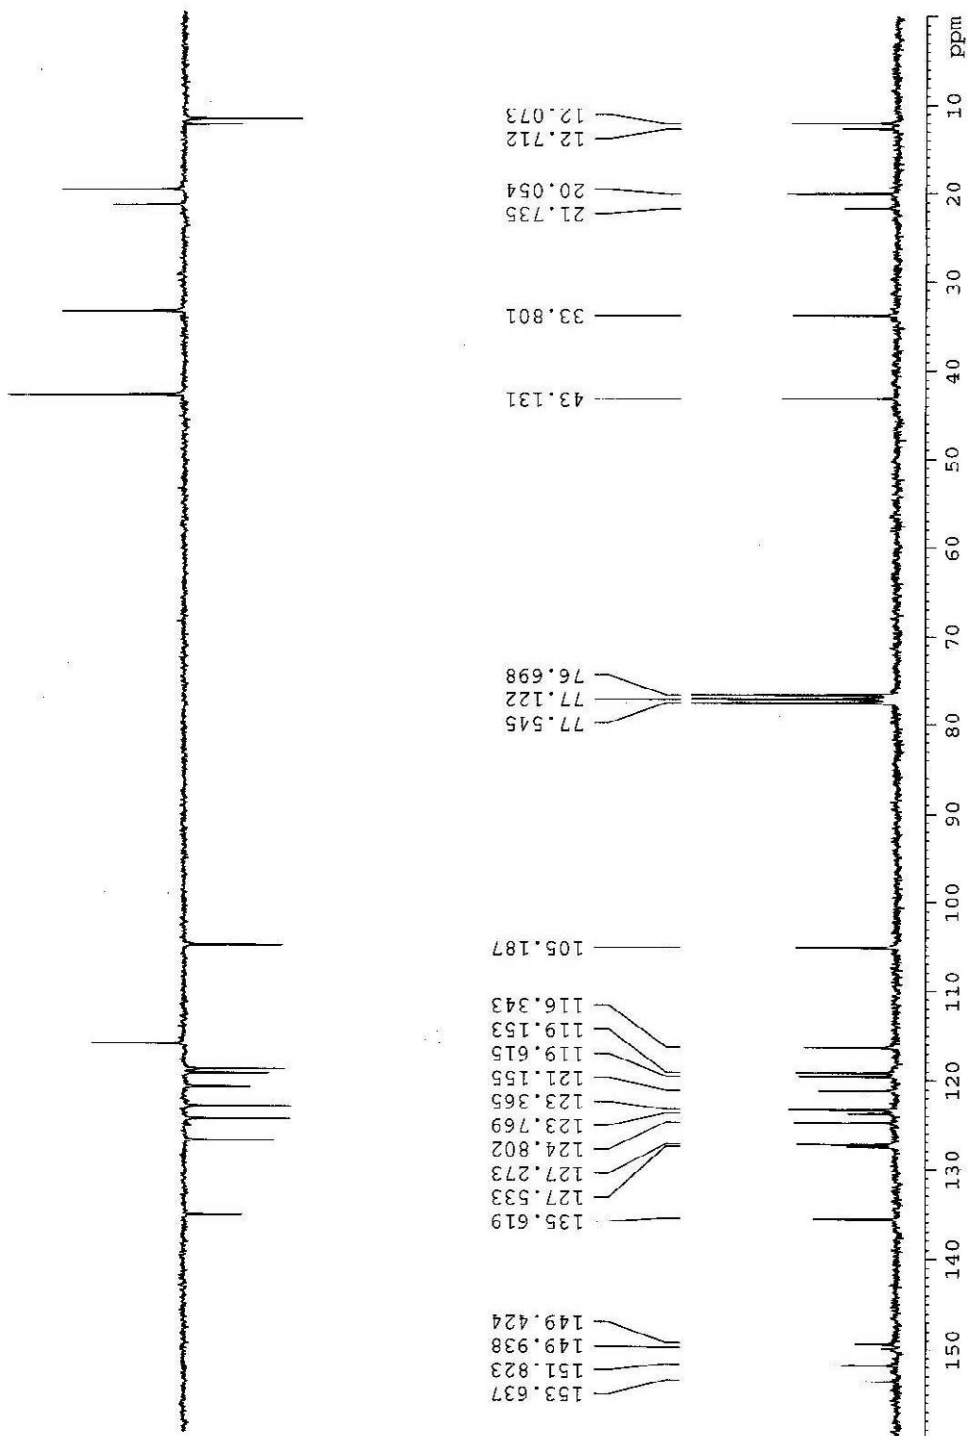

Compound 16  $^1\text{H}$  NMR (300 MHz) and  $^{13}\text{C}$  NMR (75 MHz)

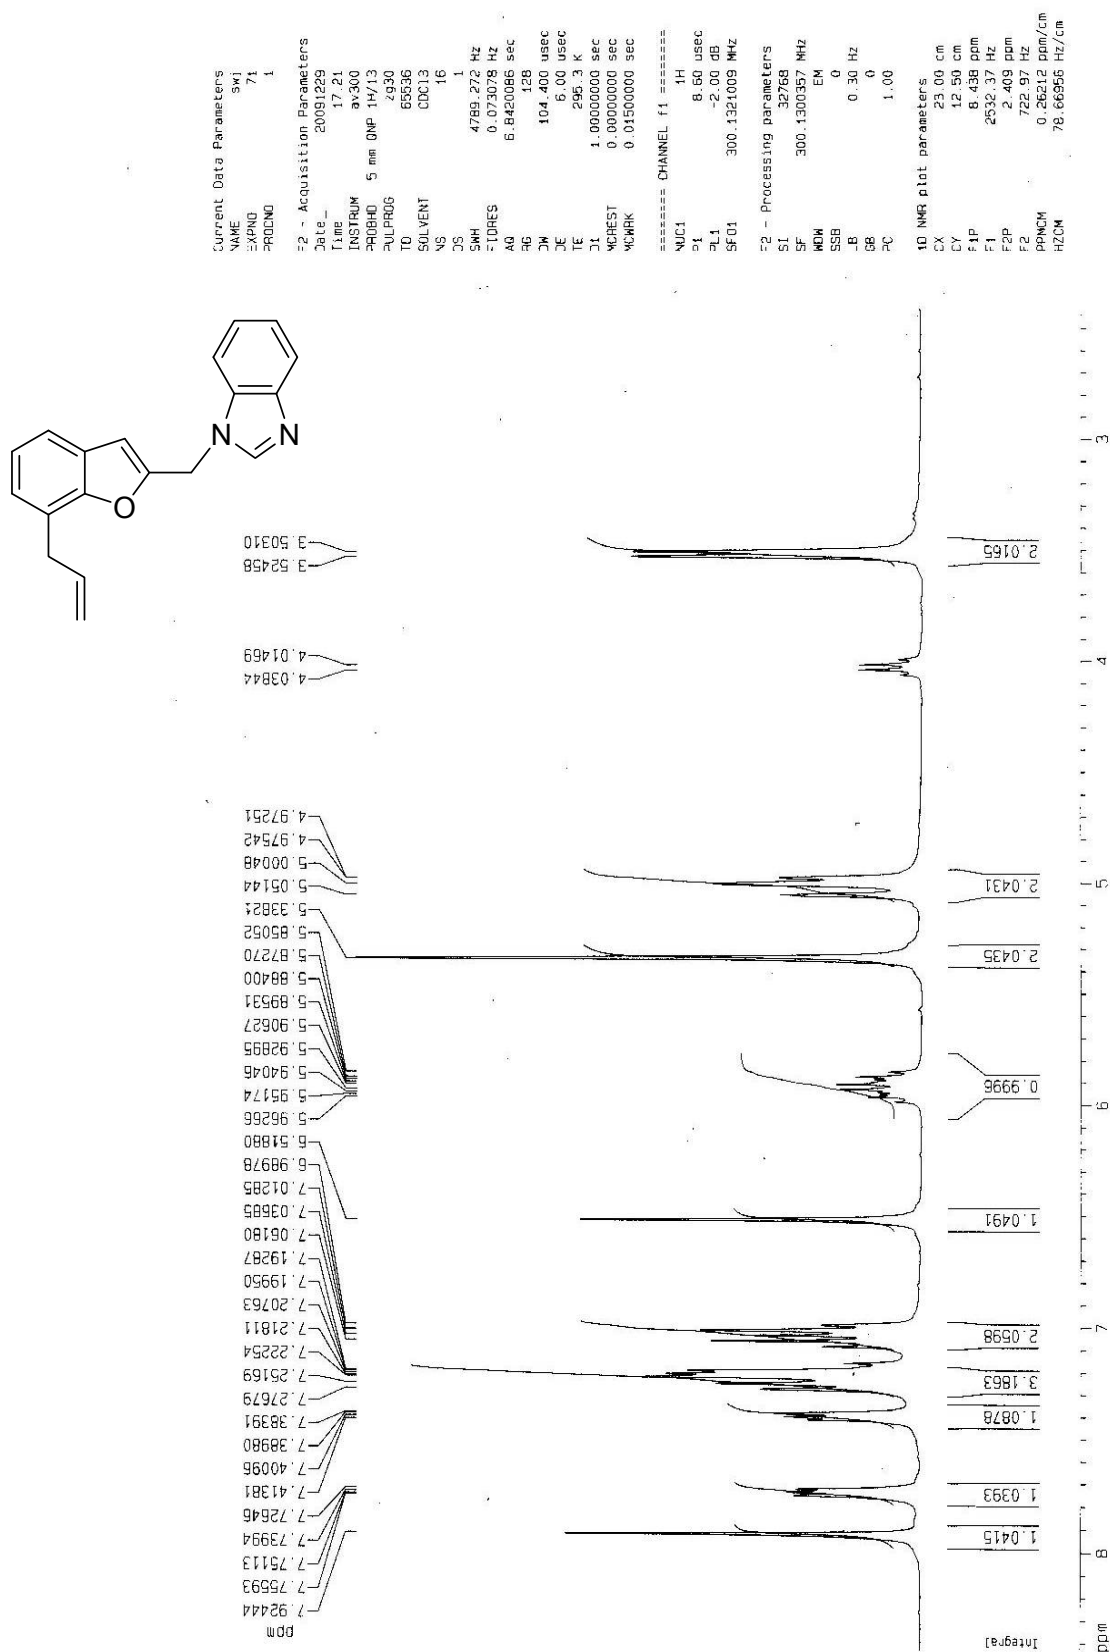

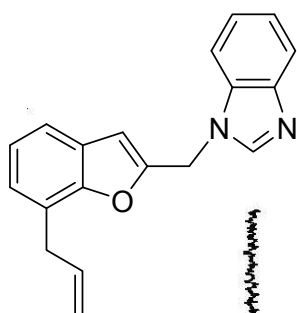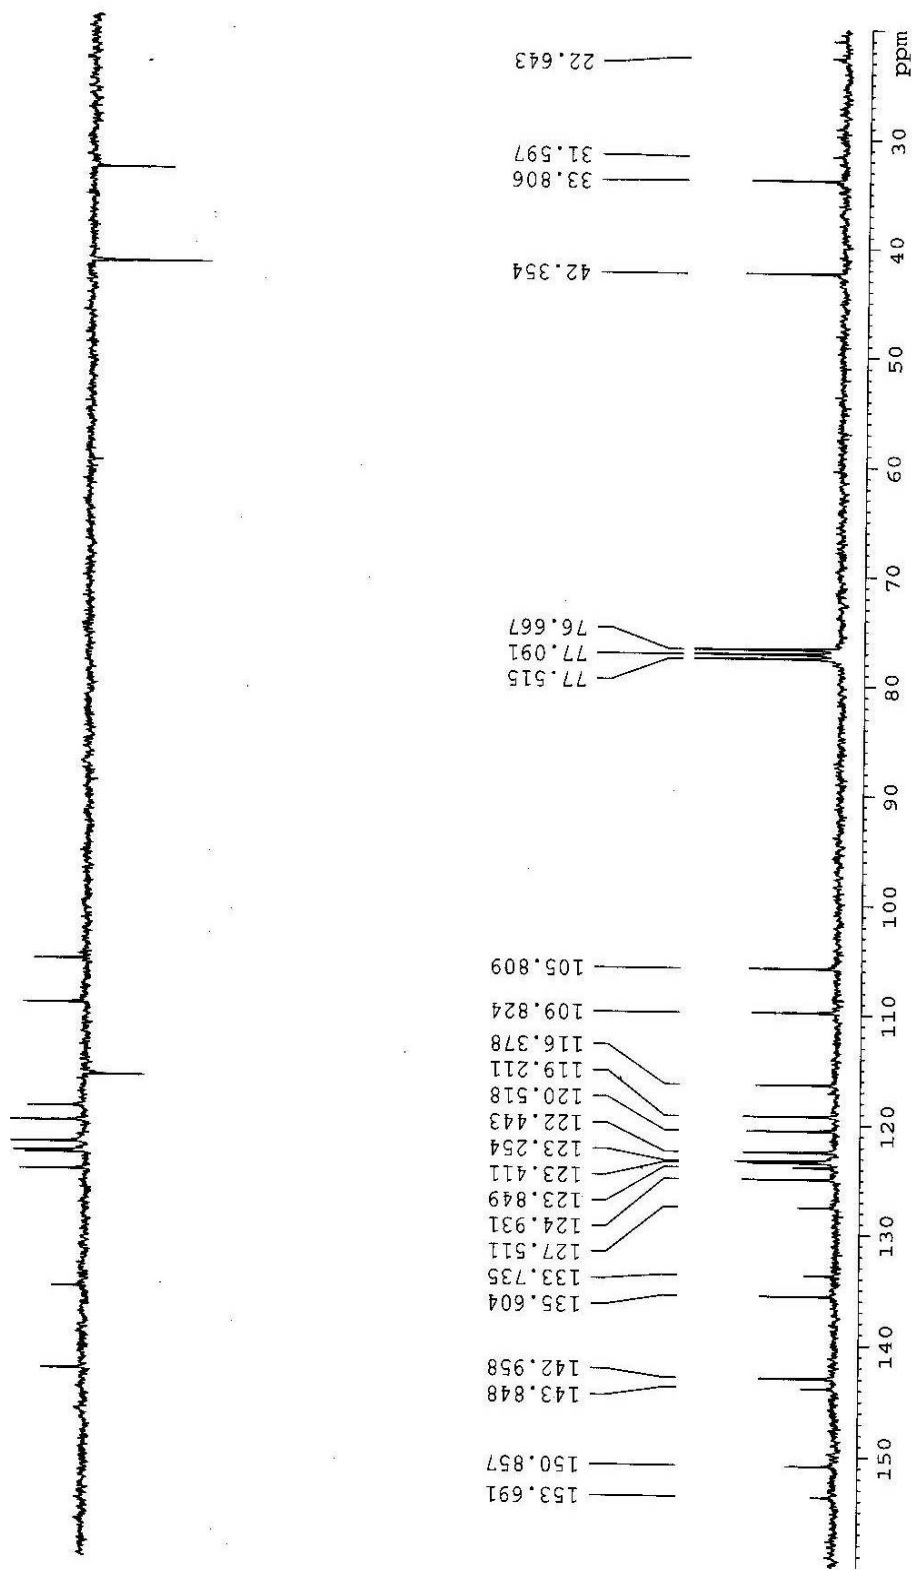

11

Compound 17  $^1\text{H}$  NMR (300 MHz) and  $^{13}\text{C}$  NMR (75 MHz)

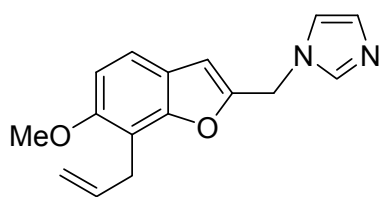

Current Data Parameters  
 NAME SWH  
 EXPNO 90  
 PROCNO 1

F2 - Acquisition Parameters  
 Date\_ 20100329  
 Time 9:37  
 INSTRUM ac300  
 PROBHD 5 mm QNP 1H/13  
 PULPROG zg30  
 TO 65536  
 SOLVENT CDCl3  
 NS 16  
 DS 1  
 SMH 4789.272 Hz  
 FIDRES 0.077078 Hz  
 AQ 6.8420065 sec  
 RG 50.0 B  
 DW 104.400 usec  
 DE 5.00 usec  
 TE 297.0 K  
 D1 1.0000000 sec  
 MCREST 0.0000000 sec  
 MCWPRK 0.0150000 sec

\*\*\*\*\* CHANNEL f1 \*\*\*\*\*  
 NUC1 1H  
 P1 8.60 usec  
 PL1 -2.00 dB  
 SF01 300.1321093 MHz

F2 - Processing parameters  
 SI 32768  
 SF 300.1295993 MHz  
 EQ  
 WDW EM  
 SSB 0  
 LB 0.30 Hz  
 GB 0  
 PC 1.00

10 NMR plot parameters  
 CY 23.00 cm  
 CX 12.50 cm  
 FJP 8.351 ppm  
 F1 2506.47 Hz  
 F2 2.627 ppm  
 F7B 58 Hz  
 PPMOH 0.24886 ppm/cm  
 HzOH 74.68092 Hz/cm

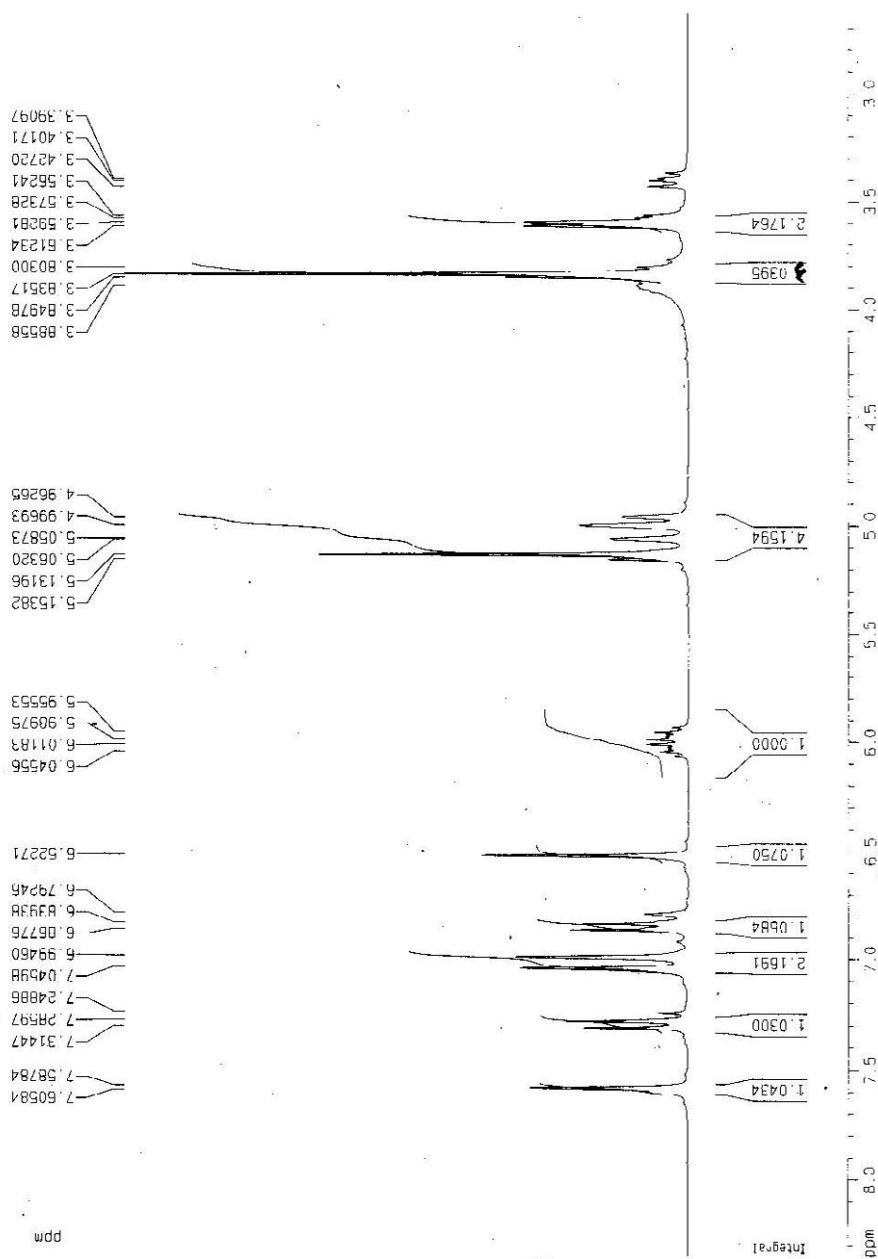



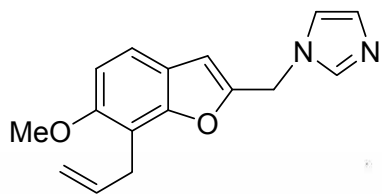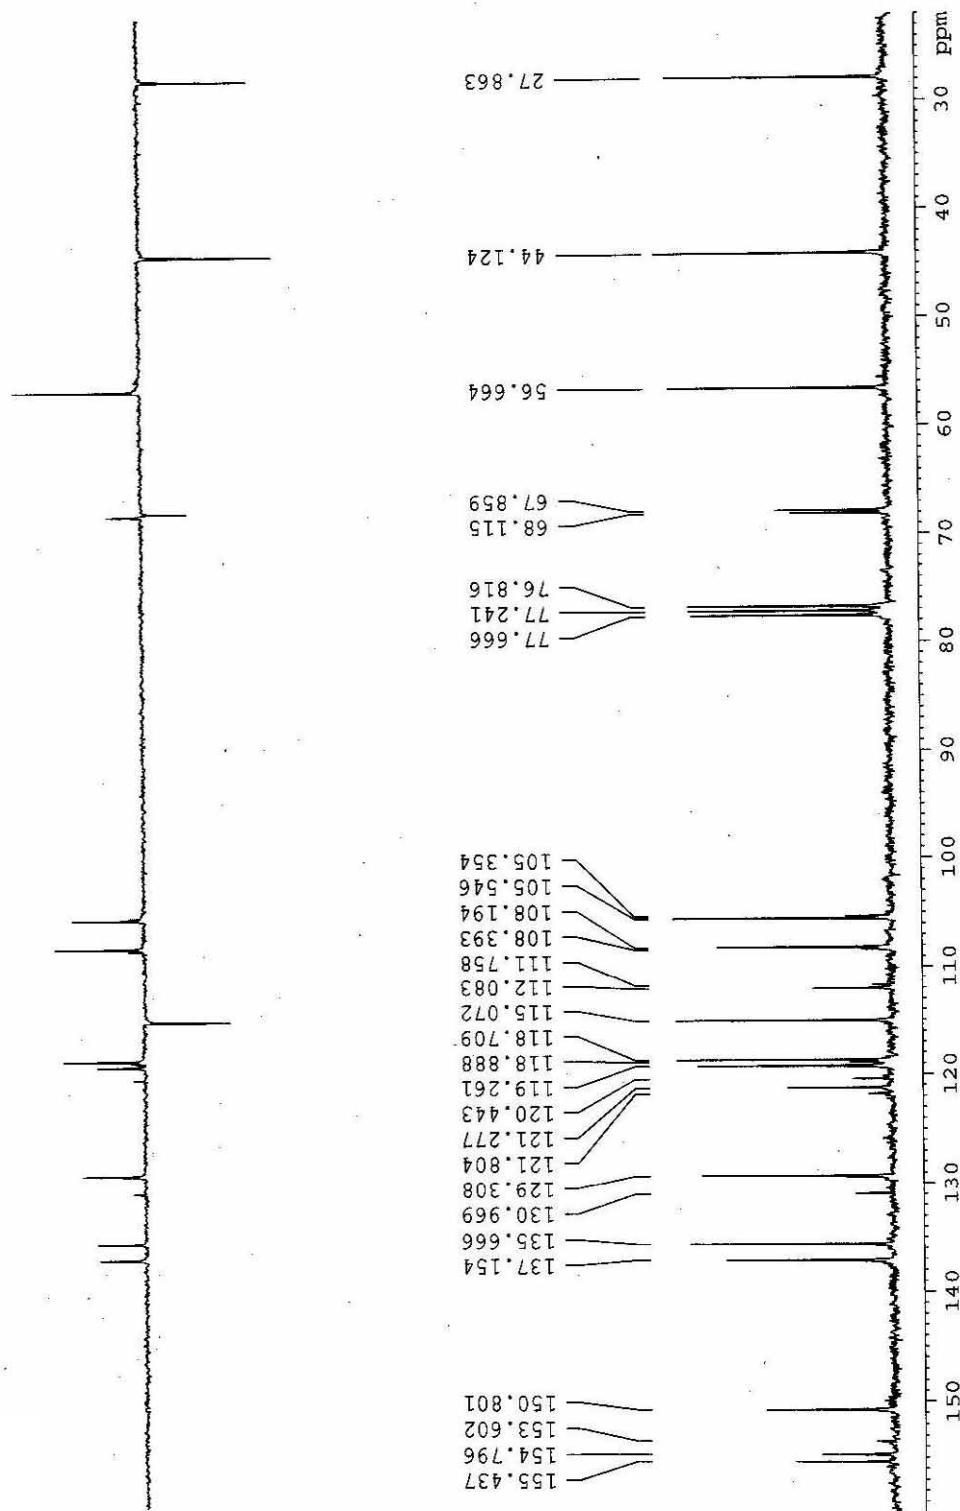

Compound 18  $^1\text{H}$  NMR (300 MHz) and  $^{13}\text{C}$  NMR (75 MHz)

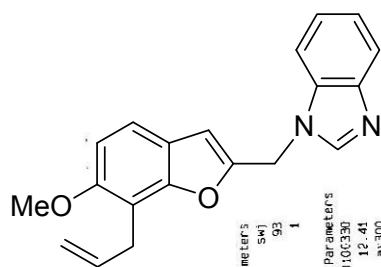

Current Data Parameters  
 NAME sw1  
 EXPNO 93  
 PROCNO 1  
 F2 - Acquisition Parameters  
 Date\_ 20100330  
 Time 12.41  
 INSTRUM av300  
 PRBHD 5 mm QNP 1H/13  
 PULPROG zg30  
 TO 69536  
 SOLVENT CDCl3  
 NS 16  
 DS 1  
 SWH 4789.272 Hz  
 FIDRES 0.077078 Hz  
 AQ 6.8423086 sec  
 RE 101.6  
 DE 104.400 usec  
 TE 296.3 K  
 D1 1.0000000 sec  
 MCREST 0.0000000 sec  
 MCNFK 0.0150000 sec  
 ===== CHANNEL f1 =====  
 NUC1 1H  
 P1 8.60 usec  
 PL1 -2.00 dB  
 SFO1 300.1321009 MHz  
 F2 - Processing parameters  
 SI 32768  
 SF 300.1360063 MHz  
 EN  
 OB 0  
 LB 0.30 Hz  
 GC 3  
 PC 1.00  
 10 NMR plot parameters  
 CX 23.00 cm  
 CY 12.50 cm  
 CZ 8.626 cm  
 F1 2589.01 Hz  
 F2 2.613 ppm  
 F3 784.36 Hz  
 GAMMA 0.26143 ppm/cm  
 MZM 78.46319 Hz/cm

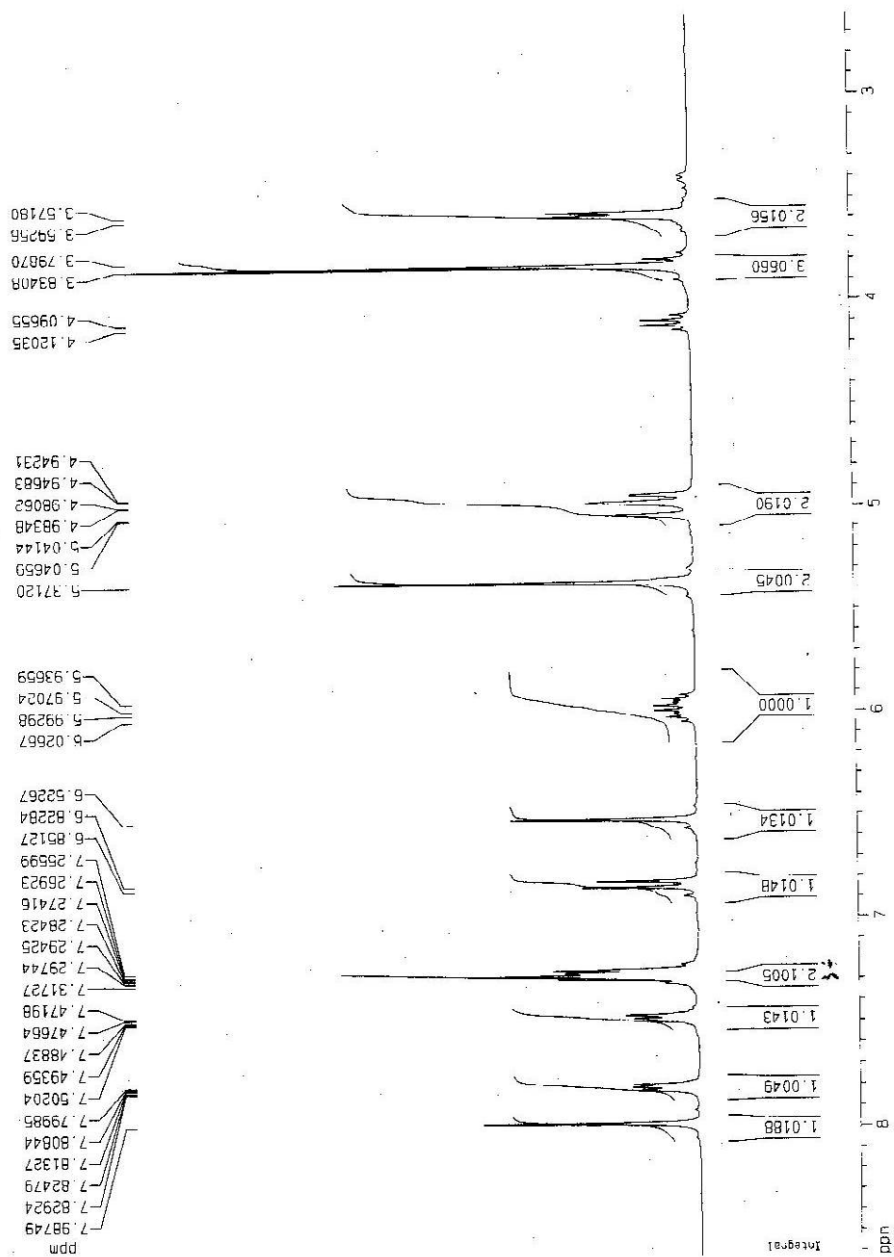

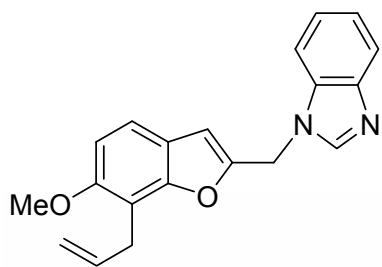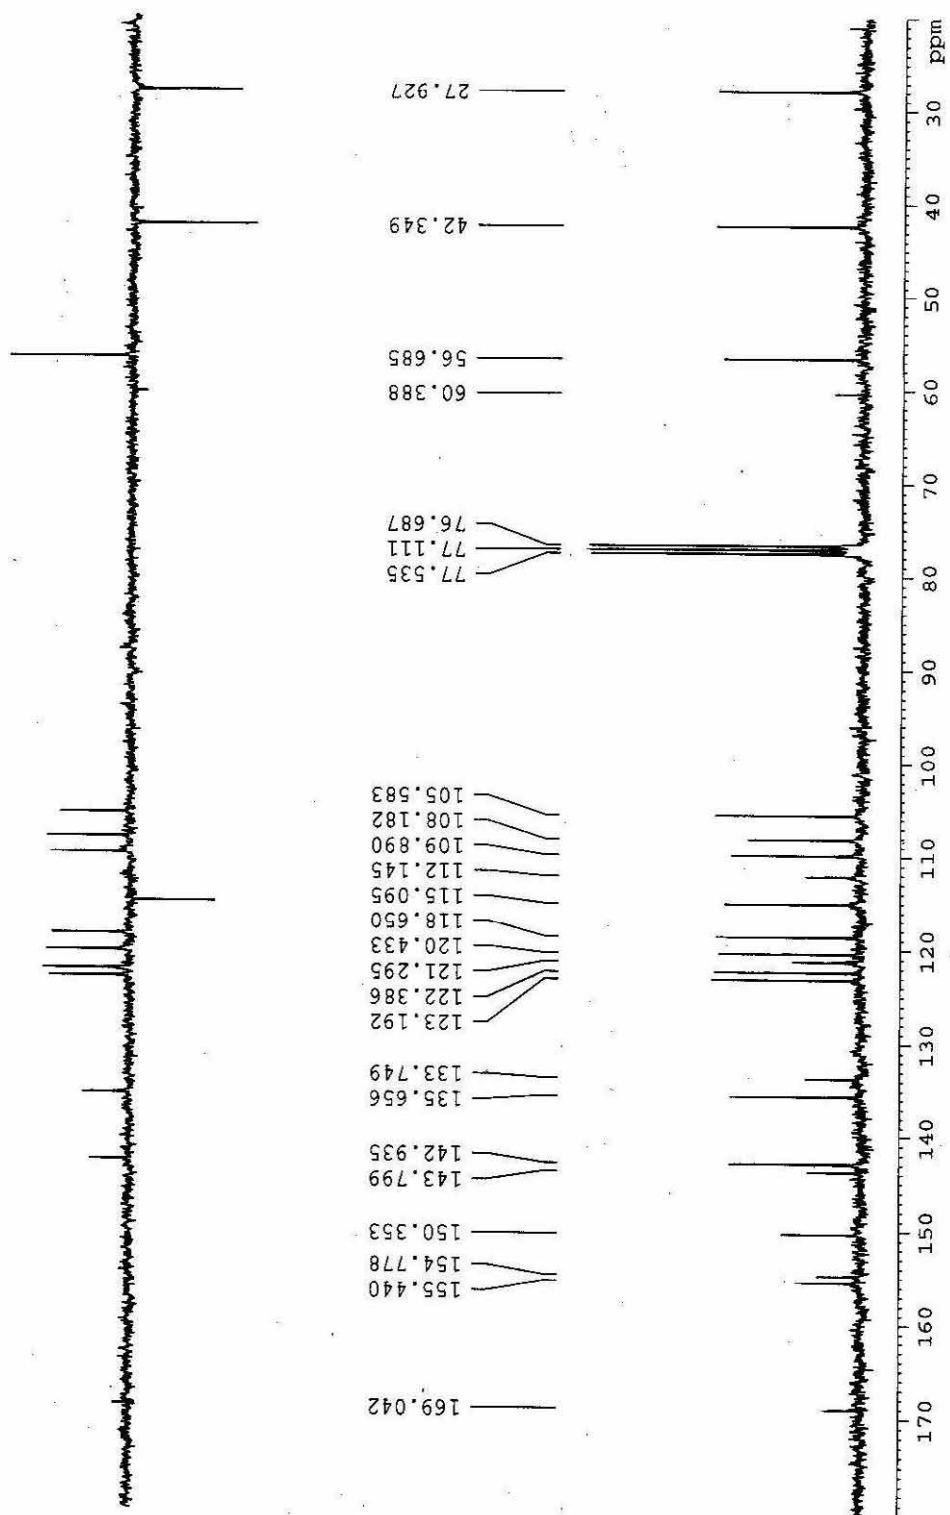

Compound 19  $^1\text{H}$  NMR (300 MHz) and  $^{13}\text{C}$  NMR (75 MHz)

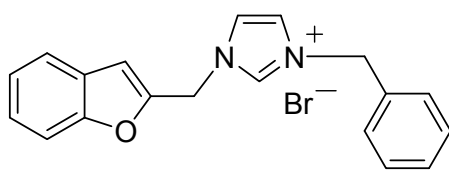

Current Data Parameters  
 NAME swi  
 EXPNO 236  
 PROCNO 1

F2 - Acquisition Parameters  
 Date\_ 20090823  
 Time 9.53  
 INSTRUM av300  
 PROBHD 5 mm QNP 1H/13  
 PULPROG zg30  
 TO 65535  
 SOLVENT MeOD  
 NS 16  
 DS 1  
 SWH 4789.272 Hz  
 FIDRES 0.073078 Hz  
 AQ 6.842086 sec  
 RG 50.5  
 DM 104.400 usec  
 DE 6.00 usec  
 TE 298.3 K  
 D1 1.00000000 sec  
 ACQRES 0.00000000 sec  
 MCWRR 0.01500000 sec

\*\*\*\*\* CHANNEL f1 \*\*\*\*\*  
 NUC1 1H  
 P1 8.60 usec  
 PL1 -2.00 dB  
 SFO1 300.1321009 MHz

F2 - Processing parameters  
 SI 32768  
 SF 300.1300000 MHz  
 MDW EM  
 SSB 0  
 LB 0.30 Hz  
 GB 0  
 PC 1.00

$^{13}\text{C}$  NMR p.p.m. parameters  
 CA 23.00 cm  
 CY 12.50 cm  
 F1P 10.053 ppm  
 F1 3017.31 Hz  
 F2P 3.674 ppm  
 F2 1102.69 Hz  
 PPMCH 0.2736 ppm/cm  
 HZCM 83.24425 Hz/cm

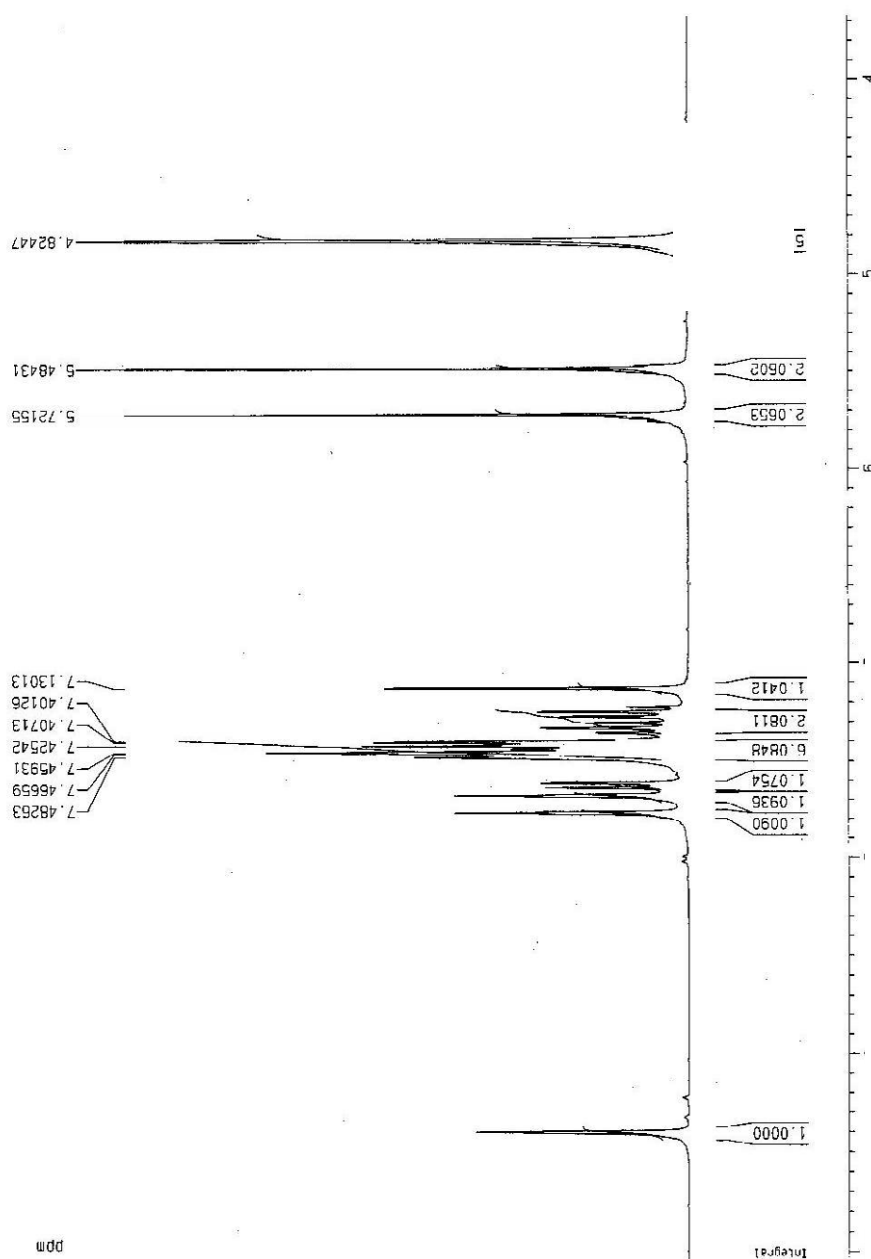

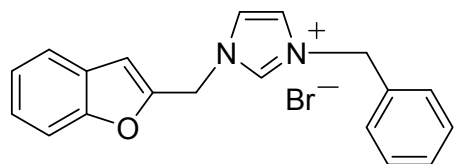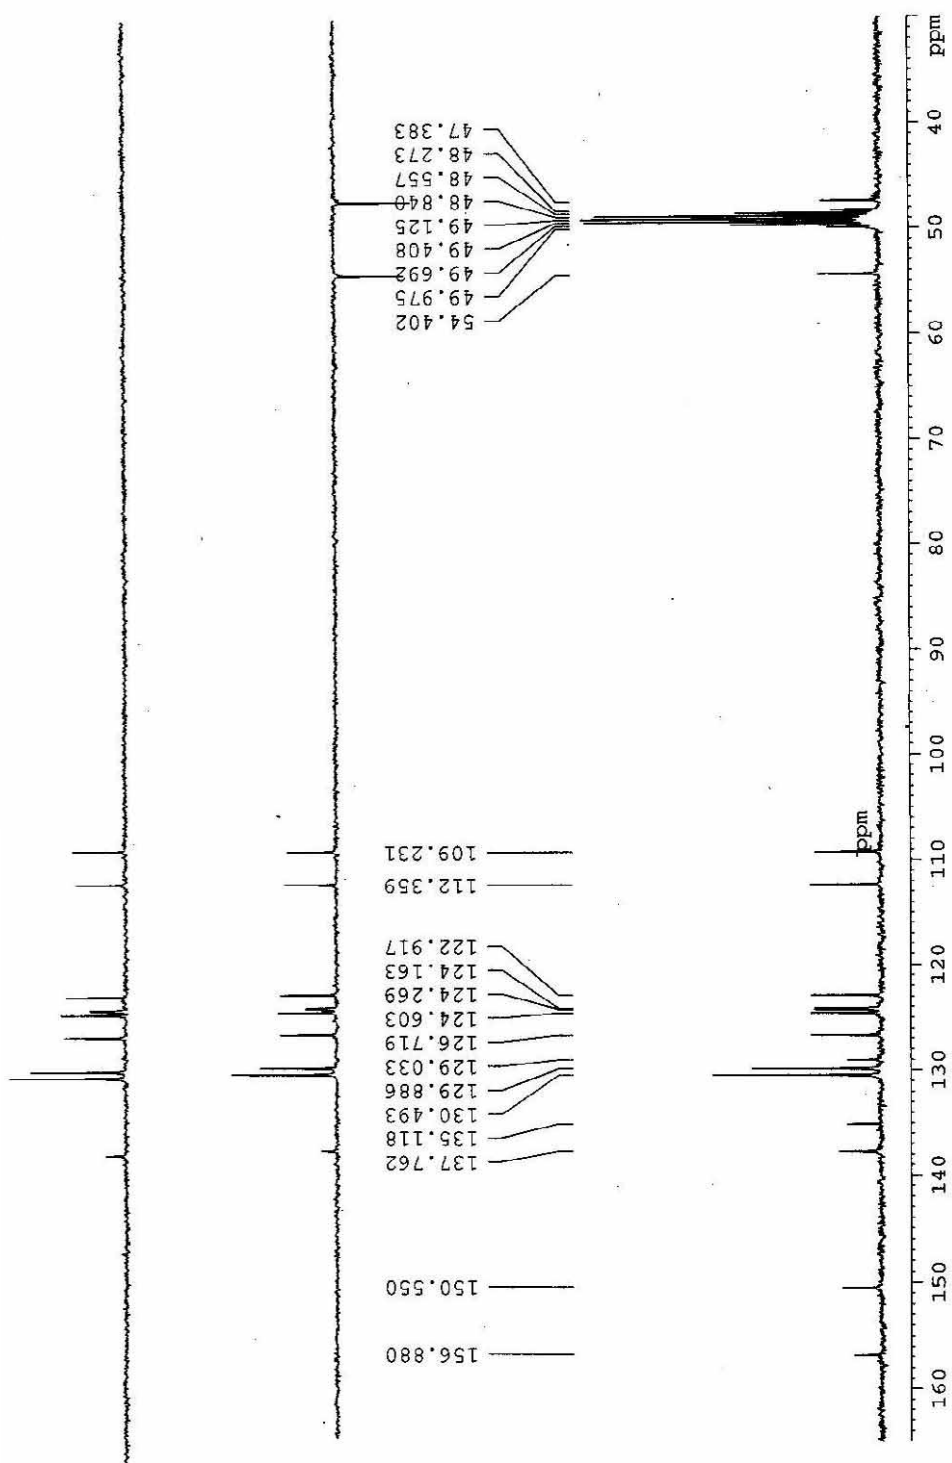

Compound 20 <sup>1</sup>H NMR (300 MHz) and <sup>13</sup>C NMR (75 MHz)

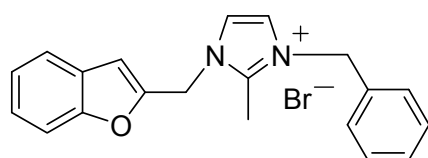

```

Current Data Parameters
NAME          SW1
EXPNO        223
PROCNO       1

F2 - Acquisition Parameters
Date_        20090622
Time         12.34
INSTRUM      zg300
PROBHD       5 mm QNP 1H/13
PULPROG      zg30
SOLVENT      MeOD
NS           9
DS           1
SWH          4785.272 Hz
FIDRES       0.073078 Hz
AQ           61.6420086 sec
RG           80.6
DM           104.400 usec
DE           6.00 usec
TE           300.7 K
O1           1.00000000 sec
ADPREST      0.00000000 sec
MCPRK        0.01500000 sec

===== CHANNEL f1 =====
NUC1          1H
P1            8.60 usec
PL1          -2.00 dB
SFO1         300.1321009 MHz

F2 - Processing parameters
SI           32768
SF          300.1299660 MHz
WDW          EM
SSB          0
LB           0.30 Hz
GB           0
PC           1.00

1D NMR plot parameters
CX          23.00 cm
CY          12.50 cm
FIDP        7.2023 cm
F1          2167.79 Hz
F2          0.288 ppm
F3          85.50 Hz
P1MCM       0.30165 ppm/cm
MCMZ        90.53445 Hz/cm
    
```

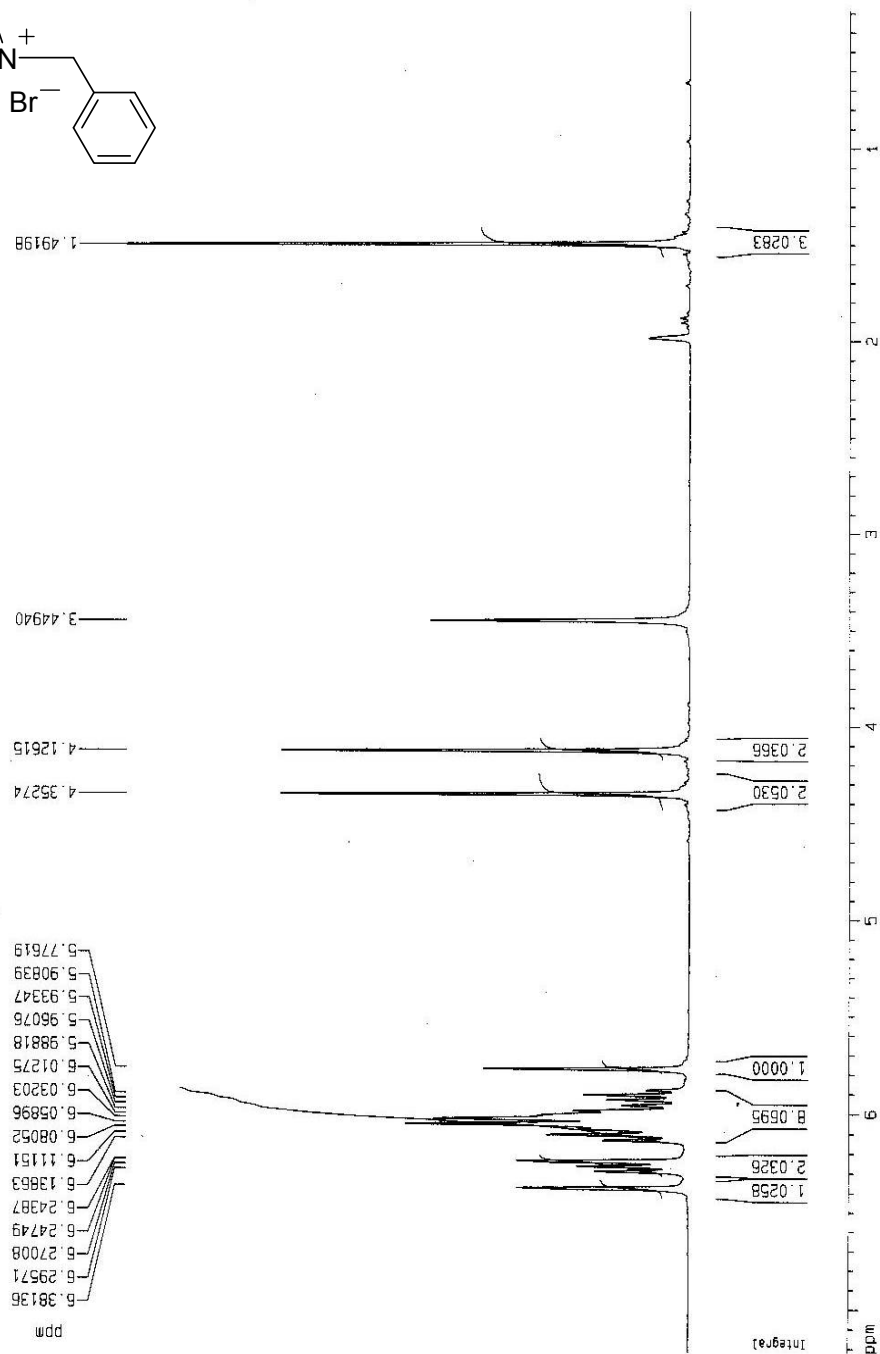

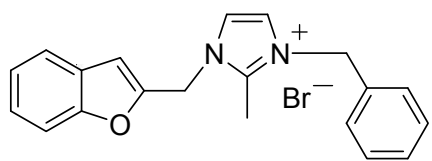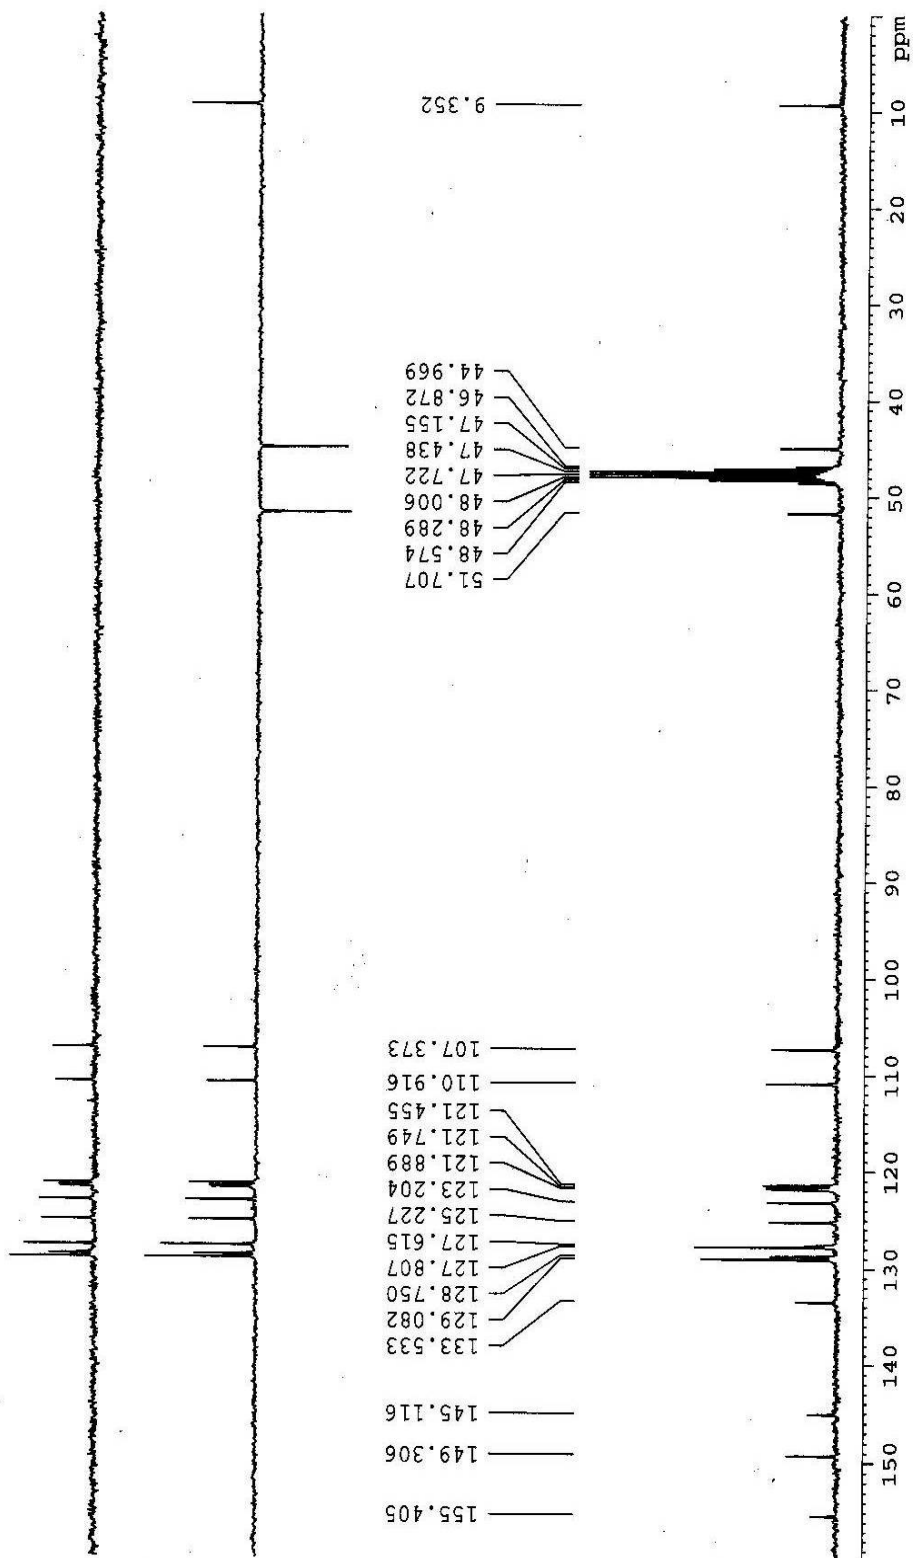

Compound 21  $^1\text{H}$  NMR (300 MHz) and  $^{13}\text{C}$  NMR (75 MHz)

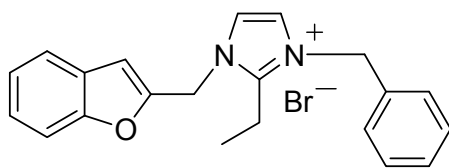

Current Data Parameters  
 NAME: 541  
 EXPNO: 199  
 PROCNO: 1

F2 - Acquisition Parameters  
 Date\_: 20090516  
 Time: 11.14  
 INSTRUM: av300  
 PROBHD: 5 mm QNP 1H/13  
 PULPROG: zg30  
 TD: 65536  
 SOLVENT: MeOD  
 NS: 16  
 DS: 1  
 SWH: 4789.272 Hz  
 FIDRES: 0.073078 Hz  
 AQ: 6.342008 sec  
 RG: 256  
 DM: 104.400 usec  
 DE: 6.00 usec  
 TE: 298.2 K  
 D1: 1.0000000 sec  
 MCREST: 0.0000000 sec  
 MCWPRG: 0.01500000 sec

===== CHANNEL f1 =====  
 NUC1: 1H  
 P1: 8.60 usec  
 PL1: -2.00 dB  
 SFO: 300.1351009 MHz

F2 - Processing parameters  
 SI: 32758  
 SF: 300.1300352 MHz  
 WDW: EM  
 SSB: 0  
 LB: 0.30 Hz  
 GB: 0  
 PC: 1.00

1D NMR plot parameters  
 CX: 23.00 cm  
 CY: 12.50 cm  
 F1P: 8.388 ppm  
 F1: 2517.48 Hz  
 F2P: 0.009 ppm  
 F2: 2.84 Hz  
 PPMCM: 0.36428 ppm/cm  
 HZCM: 109.33219 Hz/cm

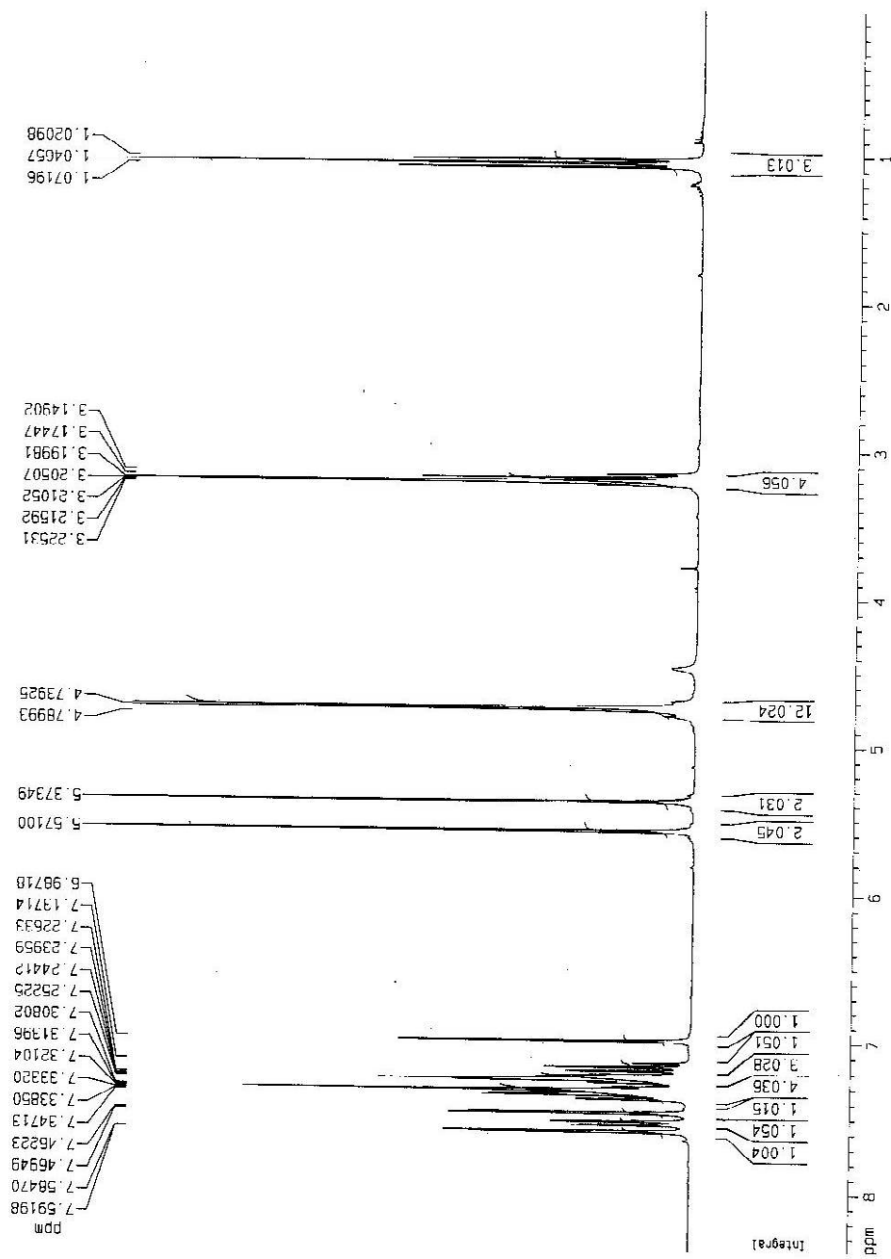



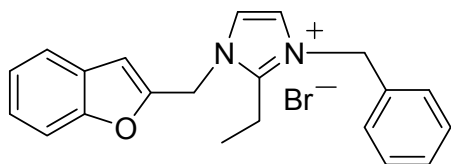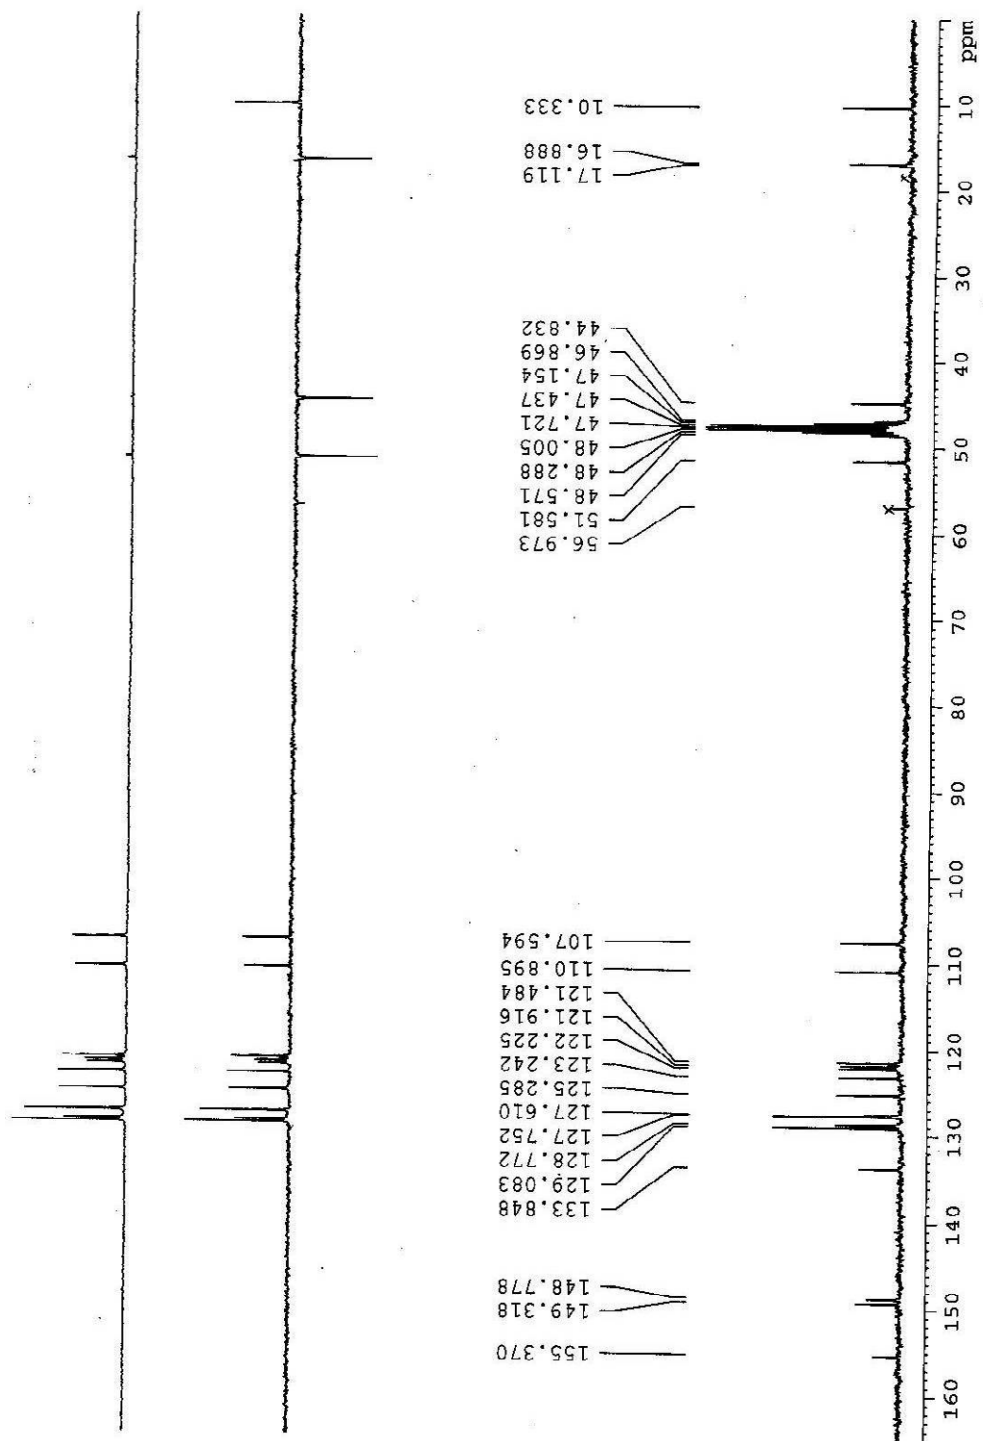

Compound 22  $^1\text{H}$  NMR (300 MHz) and  $^{13}\text{C}$  NMR (75 MHz)

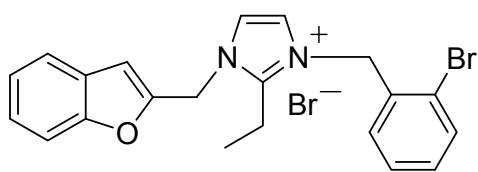

Current Data Parameters  
 NAME sw1  
 EXPNO 206  
 PROCNO 1

Date\_ 20090617  
 Time\_ 12.42  
 INSTRUM av300  
 PROBHD 5 mm QNP 1H/13  
 PULPROG zgpg30  
 TC 68536  
 SOLVENT MeOD  
 NS 16  
 DS 1  
 SH 4789.272 Hz  
 FIDRES 0.073078 Hz  
 AQ 6.8425066 sec  
 RG 50.8  
 DM 104.400 usec  
 DE 6.00 usec  
 TE 299.2 K  
 D1 1.00000000 sec  
 MCREST 0.00000000 sec  
 MCWFK 0.01500000 sec

\*\*\*\*\* CHANNEL f1 \*\*\*\*\*  
 NUC1  $^1\text{H}$   
 P1 8.60 usec  
 PL1 -2.00 dB  
 SFO1 300.1321009 MHz

F2 - Processing parameters  
 SI 300.1300000 MHz  
 SF 52768  
 WDW EM  
 SSB 0  
 LB 0.30 Hz  
 GB 0  
 PC 1.00

ID NMR plot parameters  
 CX 23.00 cm  
 CY 2.50 cm  
 FIP 8.17C ppm  
 F1 2452.05 Hz  
 F2P 0.663 ppm  
 F2 198.89 Hz  
 PPMCM 0.32640 ppm/cm  
 HZCM 97.96349 Hz/cm

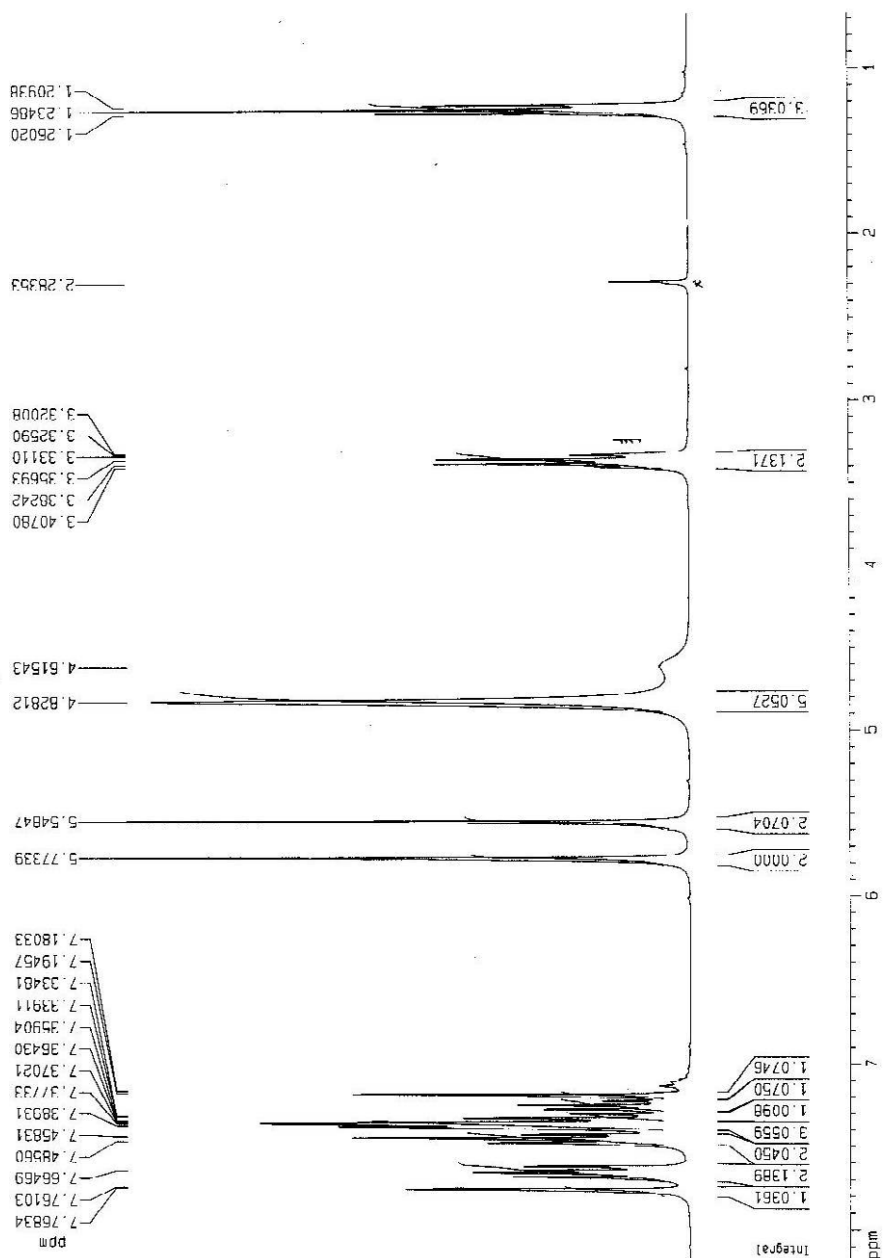

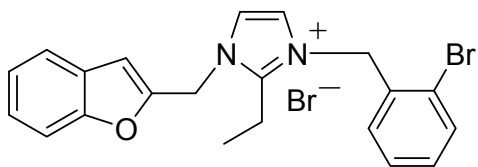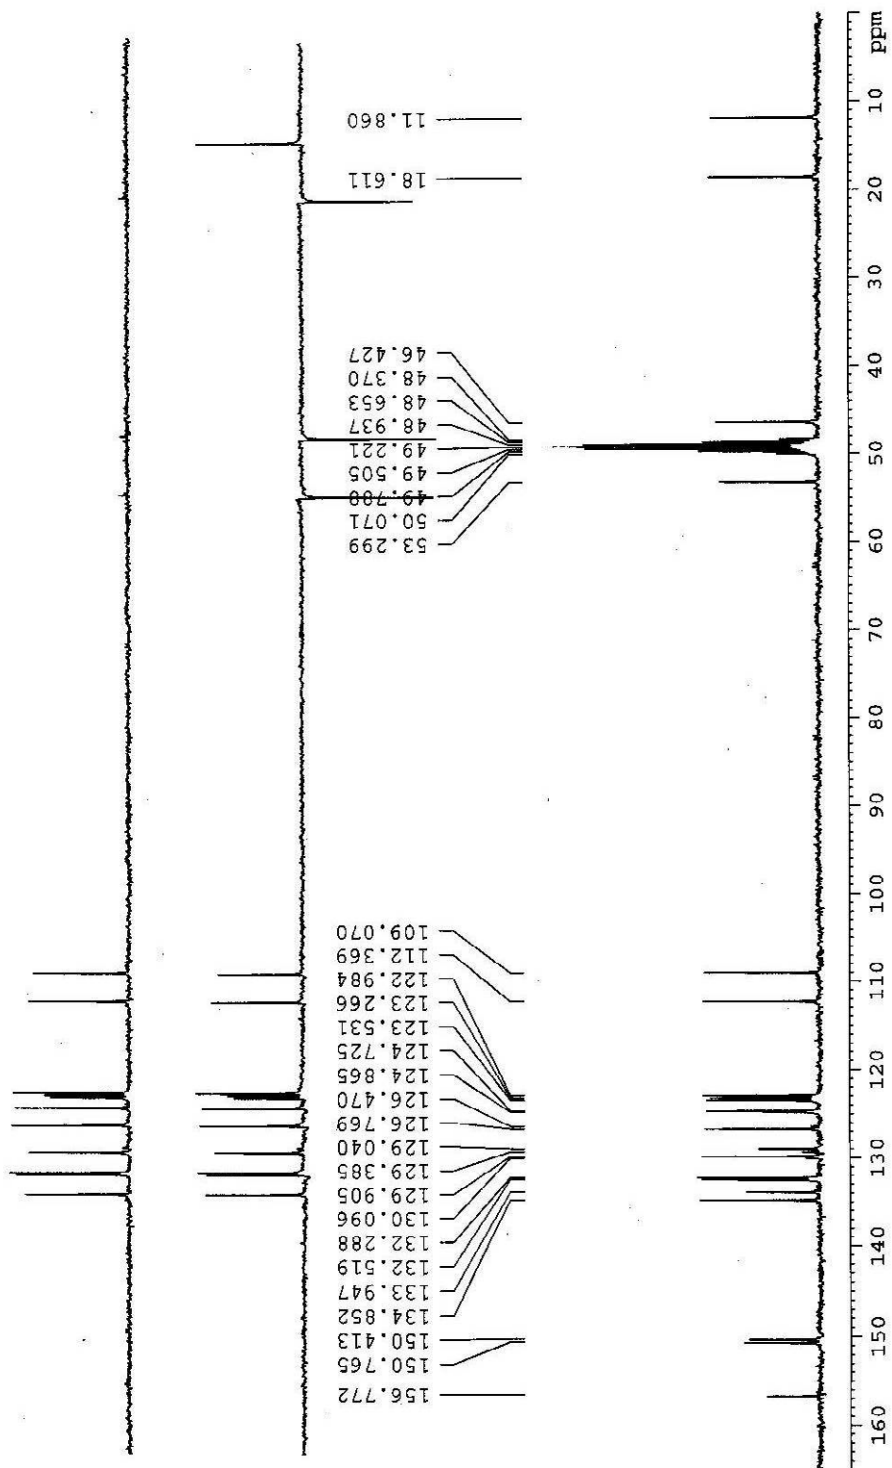

20

Compound 23  $^1\text{H}$  NMR (300 MHz) and  $^{13}\text{C}$  NMR (75 MHz)

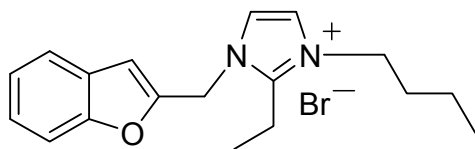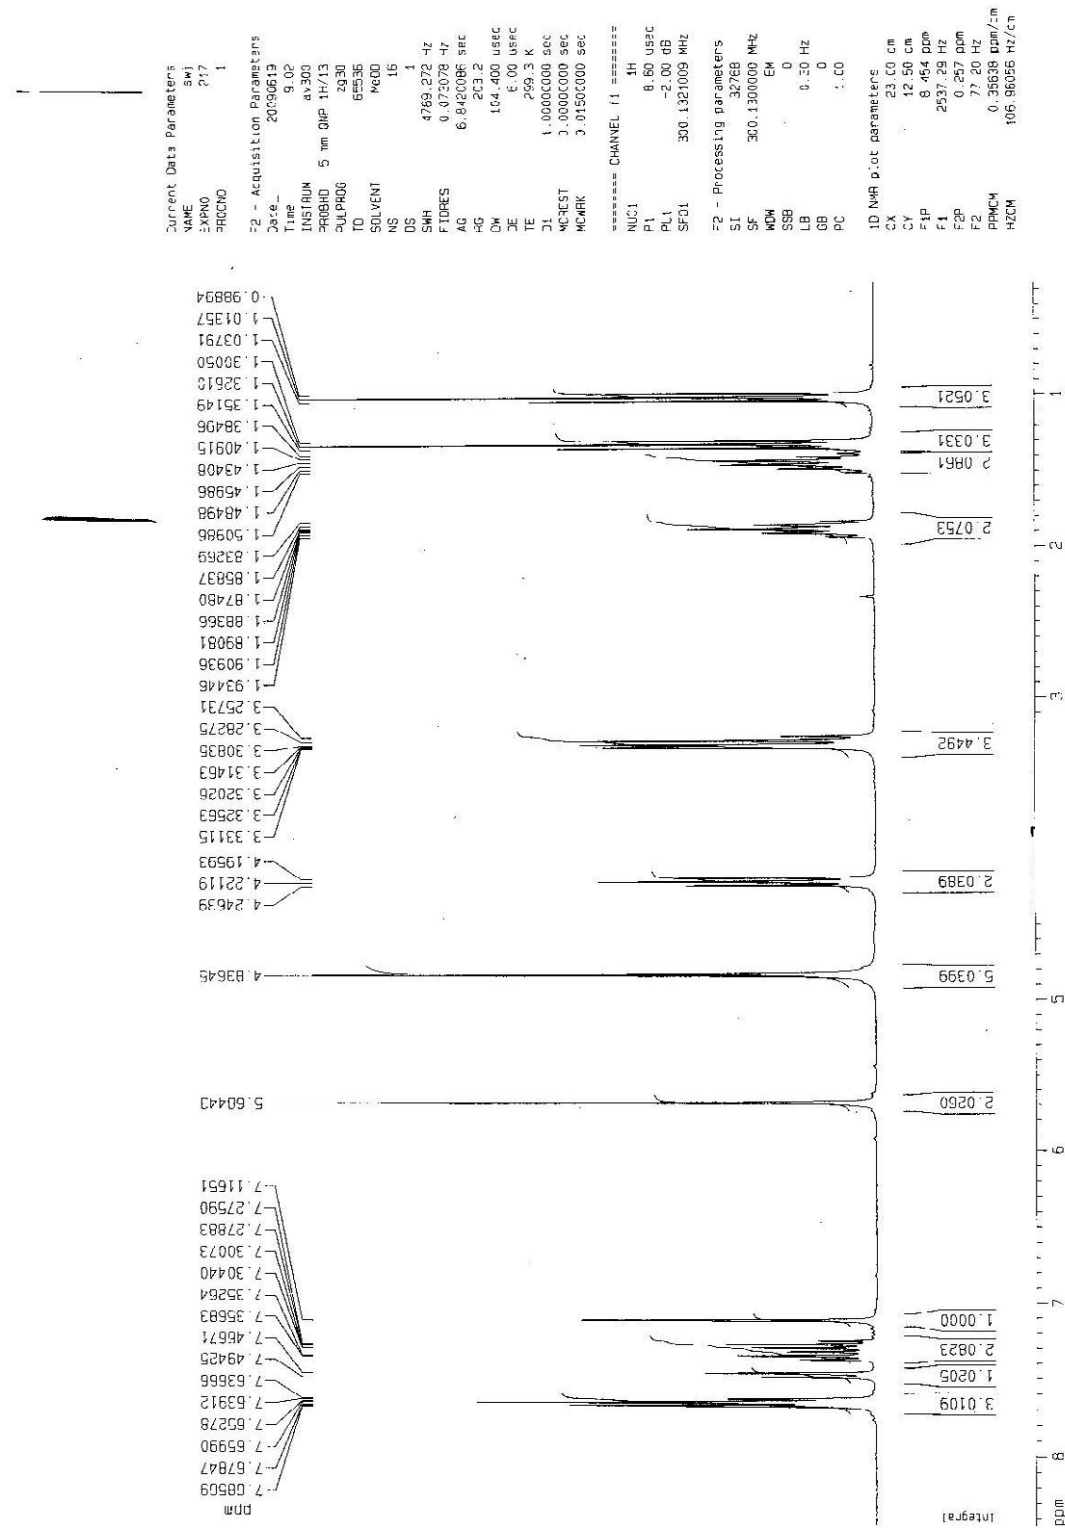

Current Data Parameters  
 NAME sw1  
 EXPNO 217  
 PROCNO 1

F2 - Acquisition Parameters  
 Date\_ 20090615  
 Time 9.02  
 INSTRUM av300  
 PROBHD 5 mm QNP 1H/13  
 PULPROG zg30  
 TO 65536  
 SOLVENT MeOD  
 NS 16  
 DS 1  
 SWH 4769.272 Hz  
 FIDRES 0.072078 Hz  
 AQ 6.8420086 sec  
 RG 233.2  
 DM 164.400 usec  
 DE 6.00 usec  
 TE 299.3 K  
 D1 1.0000000 sec  
 MC1EST 3.0000000 sec  
 MC1MRK 3.0150000 sec

===== CHANNEL f1 =====  
 NUC1  $^1\text{H}$   
 P1 8.60 usec  
 PL1 -2.00 dB  
 SF01 300.1321009 MHz

F2 - Processing parameters  
 S1 32788  
 SF 300.1300000 MHz  
 MDM EM  
 SSB 0  
 LB 0.30 Hz  
 GB 0  
 PC 1.00

1D NMR plot parameters  
 CX 23.00 cm  
 CY 12.50 cm  
 ZP 8.454 DDM  
 F1 2537.29 Hz  
 F2 0.257 ppm  
 FZ 77.20 Hz  
 PPMCM 0.35638 ppm/cm  
 HZCM 106.96056 Hz/cm

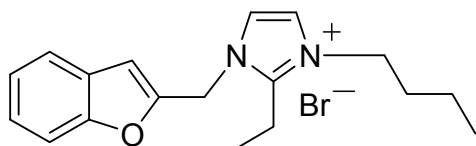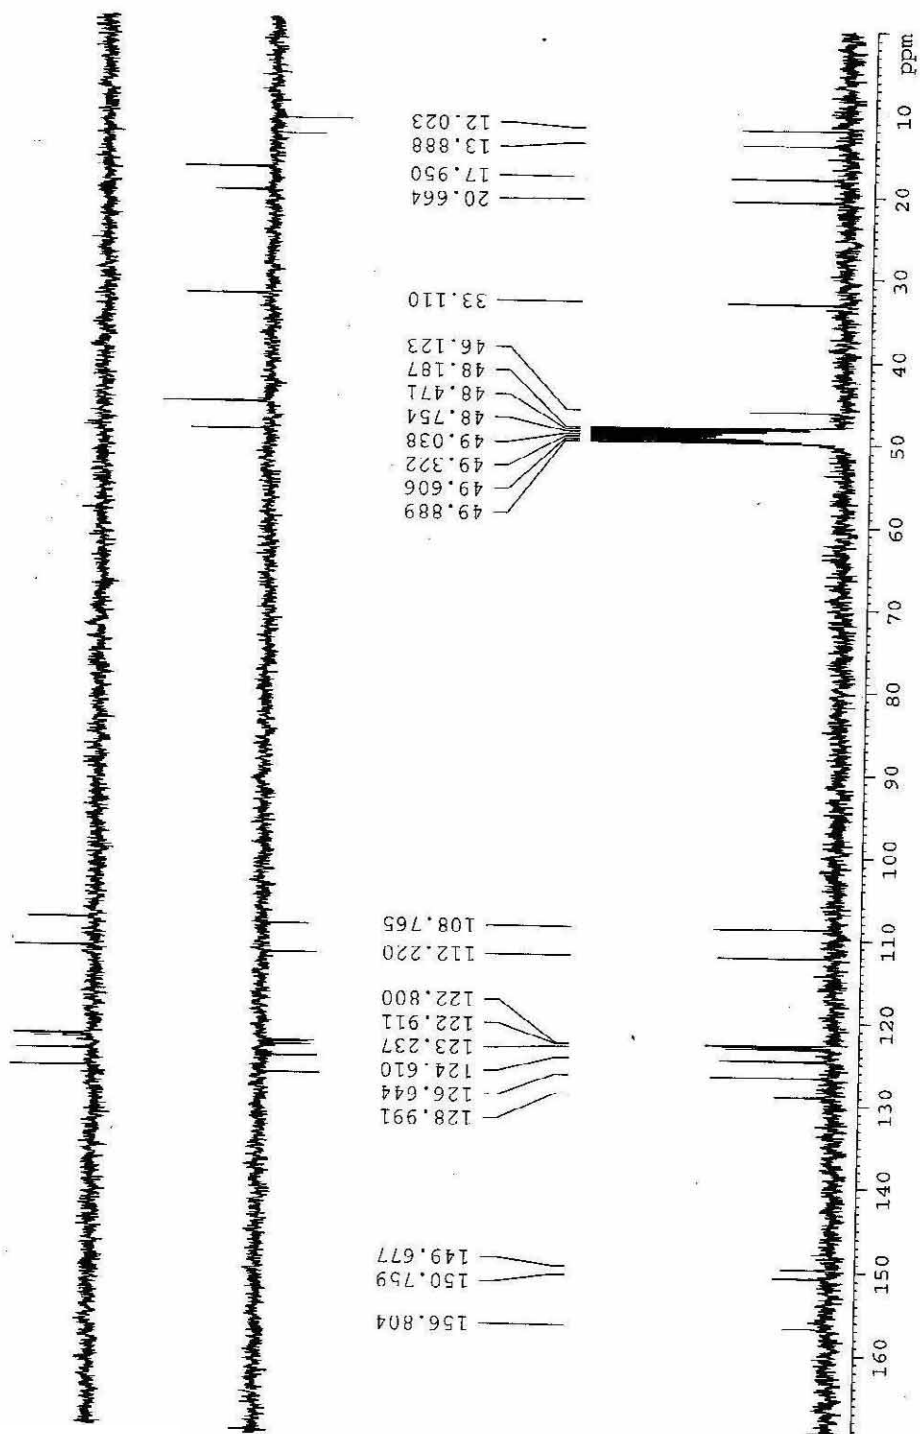

Supplement: c2ra20376f.pdf [file c2ra20376f.pdf]
